# Supplementary material for: Boston Birth Cohort profile: rationale and study design
Source: PubMed Central journal article supplement (PMC9844822; doi:10.1097/pn9.0000000000000011), 2022-08-18
Supplement: NIHMS1818381-supplement-_2.pdf [file NIHMS1818381-supplement-_2.pdf]

# Baseline

Family ID

\_\_\_\_\_

Visit ID (Baseline)

\_\_\_\_\_  
(INO)

Interview Date

\_\_\_\_\_

Interviewer's Name

\_\_\_\_\_  
(First and last name)

Location of Interview

\_\_\_\_\_

Child's home zipcode

¿Qué es su código poste?

\_\_\_\_\_

## SCREENING: FOR INTERVIEWS

### Eligibility

Are you this child's biological mother?

- Yes  
 No  
(IF NO STOP)

¿Usted es la madre biológica de..., verdad?

Are you this child's legal guardian?

- Yes  
 No  
(IF NO STOP)

¿Tiene usted custodia legal de...?

Mother's Name Matches Query

- Yes  
 No

Child's Name Matches Query

- Yes  
 No

## IF NO STOP

### Section I. Family Pedigree

Can I ask you a few questions about your child's biological father's medical history?

- Yes  
 No

¿Puedo preguntar sobre el historial médico del padre?

Father's Birth Month

¿Cuál es su fecha de nacimiento?

\_\_\_\_\_  
(Month)

---

Father's Birth Year

¿Cuál es su fecha de nacimiento?

\_\_\_\_\_  
(Year)

---

Father's Medical History

Usted sabe si el padre de ...tiene algunas enfermedades como  
Alergias alimentarias  
Eccema  
Asma  
Alergias estacionales  
Alergias a medicinas  
Otros  
Reflujo de ácido

- Food Allergy
  - Eczema
  - Asthma
  - Hay Fever
  - Drug Allergy
  - Other Allergies
  - EE
  - GERD
- 

Do you have any other children with her/his father?  
(Full Sibling)

- Yes
- No

¿Tiene ud. otros hijos con el padre de (index kid)?

---

Full Sibling 1. Gender

- Male
  - Female
- 

Full Sibling 1 Birth Month

¿Cuál es la fecha de nacimiento de el/ella?

\_\_\_\_\_  
(Month)

---

Full Sibling 1 Birth Year

¿Cuál es la fecha de nacimiento de el/ella?

\_\_\_\_\_  
(Year)

---

Full Sibling 1 Medical History

Alergias alimentarias  
Eccema  
Asma  
Alergias estacionales  
Alergias a medicinas  
Otros  
Reflujo de ácido

- Food Allergy
  - Eczema
  - Asthma
  - Hay Fever
  - Drug Allergy
  - Other Allergies
  - EE
  - GERD
- 

Full Sibling 2 Gender

- Male
  - Female
- 

Full Sibling 2 Birth Month

\_\_\_\_\_  
(Month)

---

Full Sibling 2 Birth Year

\_\_\_\_\_  
(year)

---

---

Full Sibling 2 Medical History

- Food Allergy
- Eczema
- Asthma
- Hay Fever
- Drug Allergy
- Other Allergies
- EE
- GERD

---

Full Sibling 3 Gender

- Male
- Female

---

Full Sibling 3 Birth Month

\_\_\_\_\_

(Month)

---

Full Sibling 3 Birth Year

\_\_\_\_\_

(Year)

---

Full Sibling 3 Medical History

- Food Allergy
- Eczema
- Asthma
- Hay Fever
- Drug Allergy
- Other Allergies
- EE
- GERD

---

Full Sibling 4 Gender

- Male
- Female

---

Full Sibling 4 Birth Month

\_\_\_\_\_

(Month)

---

Full Sibling 4 Birth Year

\_\_\_\_\_

(Year)

---

Full Sibling 4 Medical History

- Food Allergy
- Eczema
- Asthma
- Hay Fever
- Drug Allergy
- Other Allergies
- EE
- GERD

---

Full Sibling 5 Gender

- Male
- Female

---

Full Sibling 5 Birth Month

\_\_\_\_\_

(Month)

Full Sibling 5 Birth Year

(Year)

Full Sibling 5 Medical History

- Food Allergy
- Eczema
- Asthma
- Hay Fever
- Drug Allergy
- Other Allergies
- EE
- GERD

**1. Since birth and/or up until your child reached one year old, has your child ever had any of the following illnesses? (DURING THE FIRST YEAR OF LIFE ONLY)**

**¿Desde ha nacido o durante el primer año de... tenía algunas enfermedades como:?**

|                                                                              | Yes                   | No                    | Unsure                |
|------------------------------------------------------------------------------|-----------------------|-----------------------|-----------------------|
| Common Cold / Gripe                                                          | <input type="radio"/> | <input type="radio"/> | <input type="radio"/> |
| Ear Infection / Infección de oreja                                           | <input type="radio"/> | <input type="radio"/> | <input type="radio"/> |
| Pneumonia / Pulmonía                                                         | <input type="radio"/> | <input type="radio"/> | <input type="radio"/> |
| Skin Infection / Infección de piel                                           | <input type="radio"/> | <input type="radio"/> | <input type="radio"/> |
| Urinary Tract Infection / Infección urinaria                                 | <input type="radio"/> | <input type="radio"/> | <input type="radio"/> |
| Gastric/intestinal infection / Infección intestinal                          | <input type="radio"/> | <input type="radio"/> | <input type="radio"/> |
| Conjunctivitis / Conjuntivitis                                               | <input type="radio"/> | <input type="radio"/> | <input type="radio"/> |
| Parasite Infection / Infección de parásito                                   | <input type="radio"/> | <input type="radio"/> | <input type="radio"/> |
| Bone Infection (osteomyelitis) / Infección de hueso                          | <input type="radio"/> | <input type="radio"/> | <input type="radio"/> |
| Meningitis / Meningitis                                                      | <input type="radio"/> | <input type="radio"/> | <input type="radio"/> |
| Bacteremia/Sepsis (Blood Infection) / Infección de sangre                    | <input type="radio"/> | <input type="radio"/> | <input type="radio"/> |
| RSV/Bronchiolitis / Bronquiolitis                                            | <input type="radio"/> | <input type="radio"/> | <input type="radio"/> |
| If yes, hospitalized                                                         | <input type="radio"/> | <input type="radio"/> | <input type="radio"/> |
| Sinus Infection / Infección de seno                                          | <input type="radio"/> | <input type="radio"/> | <input type="radio"/> |
| Bronchitis / Bronquitis                                                      | <input type="radio"/> | <input type="radio"/> | <input type="radio"/> |
| Has your child been diagnosed with any other illnesses within the last year? | <input type="radio"/> | <input type="radio"/> | <input type="radio"/> |

Other illness specify

\_\_\_\_\_

Other illness specify

\_\_\_\_\_

If yes, how many times?  
Cold \_\_\_\_\_

If yes, how many times?  
Ear Infection \_\_\_\_\_

If yes, how many times?  
Pneumonia \_\_\_\_\_

If yes, how many times?  
Skin Infection \_\_\_\_\_

If yes, how many times?  
Urinary Tract Infection \_\_\_\_\_

If yes, how many times?  
Gastric/Intestinal Infection \_\_\_\_\_

If yes, how many times?  
Conjunctivitis \_\_\_\_\_

2. During the first year of life (or since birth IF THE CHILD IS UNDER 1 YEAR OLD), has your child taken any antibiotics? Antibiotics are medicine that your doctor prescribes for illnesses caused by infections. Examples of some names of commonly prescribed antibiotics are amoxicillin and penicillin?

- Yes
- No

Desde...ha nacido en el último año ¿tomo alguno antibiótico?

If yes, how many times was your child prescribed an antibiotic medicine since birth (IF UNDER 1 YEAR OLD) or in the first year of life? \_\_\_\_\_ (times)

¿Cuántas veces fue ... recetado un antibiótico?

3. During the first year of life (or since birth if the child is under 1 years old), has your child ever lived in a farming environment?

- Yes
- No

¿Ha vivido en una granja?

4. Were pets present in the home during your child's first year of life (or since birth if child is under 1 year old)?

- Yes
- No

Desde... ha nacido o en el último año, ha tenido Ud. algunas mascotas o animales en la casa?

|              | Yes                   | No                    |
|--------------|-----------------------|-----------------------|
| Cats / Gatos | <input type="radio"/> | <input type="radio"/> |
| Dogs / Pero  | <input type="radio"/> | <input type="radio"/> |

- Fish / Pez
- Birds / Pajaro
- Reptiles / Reptiles
- Rabbit / Conejos
- Guinea Pig / conejillo de Indias
- Others

If others, specify

\_\_\_\_\_

Number of cats present during child's first year?

\_\_\_\_\_

Number of dogs present during child's first year?

\_\_\_\_\_

Number of fish present during child's first year?

\_\_\_\_\_

Number of birds present in child's first year of life?

\_\_\_\_\_

5. How long has your child lived in your current home?  
Years

\_\_\_\_\_

(Years)

¿Cuántos años ha vivido ... en su casa actual?

5. How long has your child lived in your current home?  
Months

\_\_\_\_\_

(Months)

¿Cuántos años ha vivido ... en su casa actual?

6. Before the age of 5, did someone help in caring for your child for even part of the day? (nanny, daycare, preschool, relative)

- Yes
- No

Antes de la edad de cinco, ¿Alguien diferente del padres de... cuidaba de...? (Como una niñera guardería, preescolar, otra pariente)

If yes, child's age in years when childcare 1 began  
Years

\_\_\_\_\_

(Years)

¿Desde qué edad?

Child's age in months when childcare 1 began  
Months

\_\_\_\_\_

(months)

¿Desde qué edad?

Child's age in days when childcare 1 began  
Days

\_\_\_\_\_

(days)

¿Desde qué edad?

---

Child's age in years when childcare 1 ended  
Years

\_\_\_\_\_ (Years)

¿A qué edad?

---

Child's age in months that childcare 1 ended

¿A qué edad?

\_\_\_\_\_ (Months)

---

Child's age in days when childcare 1 ended  
days

¿A qué edad?

\_\_\_\_\_ (days)

---

# of days/week @ Childcare 1

¿Cuánto días por semana?

\_\_\_\_\_ (days/week)

---

# of other children @ Childcare 1

¿Cuantos otros niños? (en su clase o en el cuidado de niñera/otro pariente)

\_\_\_\_\_ (# of other children)

---

If yes, what age in years when childcare 2 began  
Years

\_\_\_\_\_ (Years)

---

Child's age in months when childcare 2 began  
Months

\_\_\_\_\_ (months)

---

Child's age in days when childcare 2 began  
Days

\_\_\_\_\_ (days)

---

Child's age in years when childcare 2 ended  
Years

\_\_\_\_\_ (Years)

---

Child's age in months that childcare 2 ended  
Months

\_\_\_\_\_ (Months)

---

Child's age in days when childcare 2 ended  
days

\_\_\_\_\_ (days)

---

# of days/week @ Childcare 2

\_\_\_\_\_ (days/week)

---

# of other children @ Childcare 2

\_\_\_\_\_ (# of other children)

7. Before your child reached the age of 5, did/do you take care of other children in your home (at least twice a week)?

- Yes
- No

Antes de la edad de cinco, ¿Ud. cuida de otros niños en su casa?

# of days/week

\_\_\_\_\_  
(# of days/week)

# of other children

\_\_\_\_\_  
(# of other children)

8. Did you breast feed or formula feed your child?

- Formula Only
- Breast Only
- Both

¿Daba el pecho? ¿O alimentaba con formula? ¿Ambos?

9. If breast fed, how long did you exclusively breast feed for (no formula)?

Months

\_\_\_\_\_  
(Months)

¿Cuánto tiempo le dio pecho exclusivamente? (No formula)

9. If breast fed, how long did you exclusively breast feed for (no formula)?

Weeks

\_\_\_\_\_  
(weeks)

¿Cuánto tiempo le dio pecho exclusivamente? (No formula)

9. If breast fed, how long did you exclusively breast feed for (no formula)?

Days

\_\_\_\_\_  
(Days)

¿Cuánto tiempo le dio pecho exclusivamente? (No formula)

**10. At what age did you introduce the following formula/milk to your child?**

**¿A qué edad le dio... formula por la primera vez?**

10. At what age did you introduce the following formula/milk to your child?  
Cow's milk formula (Enfamil, Similac)?

- never
- not yet
- unsure

Cow's milk formula introduced at:  
Years

\_\_\_\_\_  
(Years)

Cow's milk formula introduced at:  
Months

\_\_\_\_\_  
(Months)



Cow's milk formula introduced at:  
Days

\_\_\_\_\_  
(Days)

10. At what age did you introduce the following  
formula/milk to your child?  
Whey hydrolyzed formula (Goodstart)?

- never
- not yet
- unsure

¿A qué edad le dio... formula por la primera vez?

Whey hydrolyzed formula introduced at:  
Years

\_\_\_\_\_  
(Years)

Whey hydrolyzed formula introduced at:  
Months

\_\_\_\_\_  
(Months)

Whey hydrolyzed formula introduced at:  
Days

\_\_\_\_\_  
(Days)

10. At what age did you introduce the following  
formula/milk to your child?  
Casein Hydrolysate formula?

- never
- not yet
- unsure

Casein Hydrolysate formula introduced at:  
Years

\_\_\_\_\_  
(Years)

Casein Hydrolysate formula introduced at:  
Months

\_\_\_\_\_  
(Months)

Casein Hydrolysate formula introduced at:  
Days

\_\_\_\_\_  
(Days)

10. At what age did you introduce the following  
formula/milk to your child?  
Elemental formula (Neocate, Elecare, EO28)?

- never
- not yet
- unsure

Elemental formula introduced at:  
Years

\_\_\_\_\_  
(Years)

Elemental formula introduced at:  
Months

\_\_\_\_\_  
(Months)

Elemental formula introduced at:  
Days

\_\_\_\_\_  
(Days)

10. At what age did you introduce the following  
formula/milk to your child?  
Whole cow's milk?

- never
- not yet
- unsure

Whole cow's milk introduced at:  
Years

\_\_\_\_\_  
(Years)

Whole cow's milk introduced at:  
Months

\_\_\_\_\_  
(Months)

Whole cow's milk introduced at:  
Days

\_\_\_\_\_  
(Days)

10. At what age did you introduce the following  
formula/milk to your child?  
Soy formula (Isomil, Prosobee, Alsoy)?

- never  
 not yet  
 unsure

Soy formula introduced at:  
Years

\_\_\_\_\_  
(Years)

Soy formula introduced at:  
Months

\_\_\_\_\_  
(Months)

Soy formula introduced at:  
Days

\_\_\_\_\_  
(Days)

10. At what age did you introduce the following  
formula/milk to your child?  
Soy milk?

- never  
 not yet  
 unsure

Soy milk introduced at:  
Years

\_\_\_\_\_  
(years)

Soy milk introduced at:  
Months

\_\_\_\_\_  
(Months)

Soy milk formula introduced at:  
Days

\_\_\_\_\_  
(Days)

**11. In a typical week during your pregnancy with this child, on average, how often did you (THE MOTHER) eat the following foods (Only ask those : if cases, ID< 2141, if control ID< 4248)**

**¿Mientras estaba embarazada de..., con que frecuencia Ud. come estas comidas?**

None      < 1 day      1-2 days      3-5 days      6-7 days      Unsure

|                                                                                                                |                       |                       |                       |                       |                       |                       |
|----------------------------------------------------------------------------------------------------------------|-----------------------|-----------------------|-----------------------|-----------------------|-----------------------|-----------------------|
| Peanut (Including peanut butter) / Maní (o cacahuete)                                                          | <input type="radio"/> | <input type="radio"/> | <input type="radio"/> | <input type="radio"/> | <input type="radio"/> | <input type="radio"/> |
| Tree Nuts (ie almond, cashew, filbert/hazel, walnut, brazil, macadamia, pecan, pine, pistachio) / Otros nueces | <input type="radio"/> | <input type="radio"/> | <input type="radio"/> | <input type="radio"/> | <input type="radio"/> | <input type="radio"/> |
| Shellfish (ie shrimp, crab, lobster, clam, oyster, mussels) / Mariscos                                         | <input type="radio"/> | <input type="radio"/> | <input type="radio"/> | <input type="radio"/> | <input type="radio"/> | <input type="radio"/> |
| Wheat (ie pasta, bread, cereal) / Trigo (pan/cereal/pasta)                                                     | <input type="radio"/> | <input type="radio"/> | <input type="radio"/> | <input type="radio"/> | <input type="radio"/> | <input type="radio"/> |
| Soy/Tofu / Soya/Tofu                                                                                           | <input type="radio"/> | <input type="radio"/> | <input type="radio"/> | <input type="radio"/> | <input type="radio"/> | <input type="radio"/> |
| Seeds (ie sesame, sunflower, pumpkin) / Semillas                                                               | <input type="radio"/> | <input type="radio"/> | <input type="radio"/> | <input type="radio"/> | <input type="radio"/> | <input type="radio"/> |
| Orange veggies (carrots, squash, etc) / Verdura naranjas                                                       | <input type="radio"/> | <input type="radio"/> | <input type="radio"/> | <input type="radio"/> | <input type="radio"/> | <input type="radio"/> |

12. In a typical week during the period of breast feeding, how often did you (THE MOTHER) eat the following foods?

Not applicable

**12. In a typical week during the period of breast feeding, how often did you (THE MOTHER) eat the following foods?**

**¿Normalmente, mientras estaba amamantado, con qué frecuencia come las siguientes comidas? ¿Cuántas días por semana?**

|                                                                                                                | None                  | < 1 days              | 1-2 days              | 3-5 days              | 6-7 days              | Unsure                |
|----------------------------------------------------------------------------------------------------------------|-----------------------|-----------------------|-----------------------|-----------------------|-----------------------|-----------------------|
| Cow's milk/Dairy Products/Cheese / Productos Lácteos                                                           | <input type="radio"/> | <input type="radio"/> | <input type="radio"/> | <input type="radio"/> | <input type="radio"/> | <input type="radio"/> |
| Egg Whites / Huevos                                                                                            | <input type="radio"/> | <input type="radio"/> | <input type="radio"/> | <input type="radio"/> | <input type="radio"/> | <input type="radio"/> |
| Peanut (including peanut butter) / Maní (incluyendo crema/mantequilla de maní)                                 | <input type="radio"/> | <input type="radio"/> | <input type="radio"/> | <input type="radio"/> | <input type="radio"/> | <input type="radio"/> |
| Tree Nuts (ie almond, cashew, filbert/hazel, walnut, brazil, macadamia, pecan, pine, pistachio) / Otros nueces | <input type="radio"/> | <input type="radio"/> | <input type="radio"/> | <input type="radio"/> | <input type="radio"/> | <input type="radio"/> |
| Fish (ie salmon, tuna, catfish, cod, flounder, halibut, trout, bass) / Pescado                                 | <input type="radio"/> | <input type="radio"/> | <input type="radio"/> | <input type="radio"/> | <input type="radio"/> | <input type="radio"/> |
| Shellfish (shrimp, crab, lobster, clam, oyster, mussels) / Mariscos                                            | <input type="radio"/> | <input type="radio"/> | <input type="radio"/> | <input type="radio"/> | <input type="radio"/> | <input type="radio"/> |

|                                                              |                       |                       |                       |                       |                       |                       |
|--------------------------------------------------------------|-----------------------|-----------------------|-----------------------|-----------------------|-----------------------|-----------------------|
| Wheat (ie pasta, bread, cereal) /<br>Productos de Trigo      | <input type="radio"/> | <input type="radio"/> | <input type="radio"/> | <input type="radio"/> | <input type="radio"/> | <input type="radio"/> |
| Soy/Tofu / Soja/Tofu                                         | <input type="radio"/> | <input type="radio"/> | <input type="radio"/> | <input type="radio"/> | <input type="radio"/> | <input type="radio"/> |
| Seeds (ie sesame, sunflower,<br>pumpkin) / Semillas          | <input type="radio"/> | <input type="radio"/> | <input type="radio"/> | <input type="radio"/> | <input type="radio"/> | <input type="radio"/> |
| Green vegetables / Verduras<br>Verdes                        | <input type="radio"/> | <input type="radio"/> | <input type="radio"/> | <input type="radio"/> | <input type="radio"/> | <input type="radio"/> |
| Orange veggies (carrots, squash,<br>etc) / Verduras Naranjas | <input type="radio"/> | <input type="radio"/> | <input type="radio"/> | <input type="radio"/> | <input type="radio"/> | <input type="radio"/> |
| Fruits / Frutas                                              | <input type="radio"/> | <input type="radio"/> | <input type="radio"/> | <input type="radio"/> | <input type="radio"/> | <input type="radio"/> |
| Meats / Carnes                                               | <input type="radio"/> | <input type="radio"/> | <input type="radio"/> | <input type="radio"/> | <input type="radio"/> | <input type="radio"/> |
| Beans / Frijoles                                             | <input type="radio"/> | <input type="radio"/> | <input type="radio"/> | <input type="radio"/> | <input type="radio"/> | <input type="radio"/> |
| Rice / Arroz                                                 | <input type="radio"/> | <input type="radio"/> | <input type="radio"/> | <input type="radio"/> | <input type="radio"/> | <input type="radio"/> |
| Orange Juice / Jugo de naranja                               | <input type="radio"/> | <input type="radio"/> | <input type="radio"/> | <input type="radio"/> | <input type="radio"/> | <input type="radio"/> |

13. During breast feeding did you take medications for gastrointestinal upset?

- No  
 Yes  
 Unsure  
 Not Applicable

¿Cuándo estaba dando el pecho, tomaba alguna medicina para dolor de estómago?

If YES, which one of the following medications did you take?

- Antacids (Mylanta, Roloids, TUMS, Pepto-Bismol)  
 H2 Blockers (Pepcid AC, Zantac)  
 Proton Pump inhibitors (Aciphex, Prilosec, Preveacid, Nexium)  
 Prokinetic agents (Urecholine, Regland, Erythromycin)  
 Unsure  
 Other

If Others, specify:

\_\_\_\_\_  
(Other GI medications taken during breast feeding)

14. During pregnancy did you take medications for gastrointestinal upset?

- No  
 Yes  
 Unsure

¿Tomaba Ud. alguna medicina para el dolor de estómago cuando estaba embarazada...?

If YES, which one of the following medications did you take?

- Antacids (Mylanta, Roloids, TUMS, Pepto-Bismol)  
 H2 Blockers (Pepcid AC, Zantac)  
 Proton Pump inhibitors (Aciphex, Prilosec, Preveacid, Nexium)  
 Prokinetic agents (Urecholine, Regland, Erythromycin)  
 Unsure  
 Other

If Others, specify:

\_\_\_\_\_

15. In a typical week while you were breast feeding, what brands of skin oil or lotions did you (THE MOTHER) apply to the breast area?

- None  
 Yes, I remember  
 Yes, but I don't remember  
 Unsure  
 Not Applicable

¿Cuándo Ud. daba el pecho a ..., usaba crema o loción en el pecho? ¿Qué tipo o marca?

They are:  
Lotion 1

\_\_\_\_\_  
(Lotion 1 applied to breast area while breast feeding)

They are:  
Lotion 2

\_\_\_\_\_  
(Lotion 2 applied to breast area while breast feeding)

They are:  
Lotion 3

\_\_\_\_\_  
(Lotion 3 applied to breast area while breast feeding)

They are:  
Lotion 4

\_\_\_\_\_  
(Lotion 4 applied to breast area while breast feeding)

16. At what age did you first introduce solid food to your child?

- Not yet  
 Never  
 Unsure

¿Qué edad tenía cuando comió comidas solidas por la primera vez?

16. At what age did you first introduce solid food to your child?  
Years

\_\_\_\_\_  
(Child's age in years at solid food introduction)

16. At what age did you first introduce solid food to your child?  
Months

\_\_\_\_\_  
(Child's age in months at solid food introduction)

### 17. At what age did you first introduce the following foods to your child?

**Ahora, le diré una lista de comidas, y Ud. me dirá que edad tenía... cuando le día estas siguientes comida por la primera vez?**

17. At what age did you first introduce the following foods to your child?

- never  
 not yet  
 unsure

Jar Vegetables (baby food)

Verduras para bebes

17. At what age did you first introduce the following foods to your child?

Jar vegetables (baby food)

Years

\_\_\_\_\_  
(Child's age in years at introduction of jar vegetables)

17. At what age did you first introduce the following foods to your child?

Jar Vegetables (baby food)  
Months

\_\_\_\_\_  
(Child's age in months at introduction of jar vegetables)

17. At what age did you first introduce the following foods to your child?

Green Vegetables

- never  
 not yet  
 unsure

Verduras verdes

17. At what age did you first introduce the following foods to your child?

Green vegetables  
Years

\_\_\_\_\_  
(Child's age in years at introduction of green vegetables)

17. At what age did you first introduce the following foods to your child?

Green vegetables  
Months

\_\_\_\_\_  
(Child's age in months at introduction of green vegetables)

17. At what age did you first introduce the following foods to your child?

Orange Vegetables

- never  
 not yet  
 unsure

Verduras naranjas

17. At what age did you first introduce the following foods to your child?

Orange vegetables  
Years

\_\_\_\_\_  
(Child's age in years at introduction of orange vegetables)

17. At what age did you first introduce the following foods to your child?

Orange vegetables  
Months

\_\_\_\_\_  
(Child's age in months at introduction of orange vegetables)

17. At what age did you first introduce the following foods to your child?

Jar Fruits

- never  
 not yet  
 unsure

Frutas para bebes

17. At what age did you first introduce the following foods to your child?

Jar Fruits  
Years

\_\_\_\_\_  
(Child's age in years at introduction of jar fruits)

17. At what age did you first introduce the following foods to your child?

Jar Fruits  
Months

\_\_\_\_\_  
(Child's age in months at introduction of jar fruits)

17. At what age did you first introduce the following foods to your child?

Fresh Fruits

- never  
 not yet  
 unsure

Frutas solida

17. At what age did you first introduce the following foods to your child?

Fresh Fruits  
Years

\_\_\_\_\_  
(Child's age in years at introduction of fresh fruits)

17. At what age did you first introduce the following foods to your child?

Fresh Fruits  
Months

\_\_\_\_\_  
(Child's age in months at introduction of fresh fruits)

17. At what age did you first introduce the following foods to your child?

Rice Cereal

- never  
 not yet  
 unsure

Cereal de arroz

17. At what age did you first introduce the following foods to your child?

Rice Cereal  
Years

\_\_\_\_\_  
(Child's age in years at introduction of rice cereal)

17. At what age did you first introduce the following foods to your child?

Rice Cereal  
Months

\_\_\_\_\_  
(Child's age in months at introduction of rice cereal)

17. At what age did you first introduce the following foods to your child?

Cow's Milk/Dairy Products/Cheese

- never  
 not yet  
 unsure

Productos lácteos

17. At what age did you first introduce the following foods to your child?

Cow's Milk/Dairy Products/Cheese  
Years

\_\_\_\_\_  
(Child's age in years at introduction of Cow's Milk/Dairy Products/Cheese)

17. At what age did you first introduce the following foods to your child?

Cow's Milk/Dairy Products/Cheese  
Months

\_\_\_\_\_  
(Child's age in months at introduction of Cow's Milk/Dairy Products/Cheese)

17. At what age did you first introduce the following foods to your child?

Egg

- never  
 not yet  
 unsure

Huevos

17. At what age did you first introduce the following foods to your child?

Egg  
Years

\_\_\_\_\_  
(Child's age in years at introduction of egg)

17. At what age did you first introduce the following foods to your child?

Egg  
Months

\_\_\_\_\_  
(Child's age in months at introduction of egg)

17. At what age did you first introduce the following foods to your child?  
Meat

- never  
 not yet  
 unsure

Carne

17. At what age did you first introduce the following foods to your child?  
meat  
Years

\_\_\_\_\_  
(Child's age in years at introduction of meat)

17. At what age did you first introduce the following foods to your child?  
Meat  
Months

\_\_\_\_\_  
(Child's age in months at introduction of meat)

17. At what age did you first introduce the following foods to your child?  
Fruit Juice

- never  
 not yet  
 unsure

Jugo de fruta

17. At what age did you first introduce the following foods to your child?  
Fruit Juice  
Years

\_\_\_\_\_  
(Child's age in years at introduction of fruit juice)

17. At what age did you first introduce the following foods to your child?  
Fruit Juice  
Months

\_\_\_\_\_  
(Child's age in months at introduction of fruit juice)

17. At what age did you first introduce the following foods to your child?  
Peanut (incl. peanut butter)

- never  
 not yet  
 unsure

Maní (incluyendo mantequilla de maní)

17. At what age did you first introduce the following foods to your child?  
Peanut (incl. peanut butter)  
Years

\_\_\_\_\_  
(Child's age in years at introduction of Peanut (incl. peanut butter))

17. At what age did you first introduce the following foods to your child?  
Peanut (incl. peanut butter)  
Months

\_\_\_\_\_  
(Child's age in months at introduction of Peanut (incl. peanut butter))

17. At what age did you first introduce the following foods to your child?  
Tree Nuts (ie almond, cashew, filbert/hazel, macadamia, pecan, pine, pistachio)

- never  
 not yet  
 unsure

Nueces



17. At what age did you first introduce the following foods to your child?

Tree Nuts (ie almond, cashew, filbert/hazel, macadamia, pecan, pine, pistachio)

Years

\_\_\_\_\_  
(Child's age in years at introduction of tree nuts)

17. At what age did you first introduce the following foods to your child?

Tree Nuts (ie almond, cashew, filbert/hazel, macadamia, pecan, pine, pistachio)

Months

\_\_\_\_\_  
(Child's age in months at introduction of tree nuts)

17. At what age did you first introduce the following foods to your child?

Fish

Pez

- never  
 not yet  
 unsure

17. At what age did you first introduce the following foods to your child?

Fish

Years

\_\_\_\_\_  
(Child's age in years at introduction of fish)

17. At what age did you first introduce the following foods to your child?

Fish

Months

\_\_\_\_\_  
(Child's age in months at introduction of fish)

17. At what age did you first introduce the following foods to your child?

Shellfish

Mariscos

- never  
 not yet  
 unsure

17. At what age did you first introduce the following foods to your child?

Shell Fish

Years

\_\_\_\_\_  
(Child's age in years at introduction of shell fish)

17. At what age did you first introduce the following foods to your child?

Shellfish

Months

\_\_\_\_\_  
(Child's age in months at introduction of shellfish)

17. At what age did you first introduce the following foods to your child?

Wheat (ie pasta, bread, cereal)

Trigo

- never  
 not yet  
 unsure

17. At what age did you first introduce the following foods to your child?

Wheat (ie pasta, bread, cereal)

Years

\_\_\_\_\_  
(Child's age in years at introduction of wheat)

17. At what age did you first introduce the following foods to your child?

Wheat (ie pasta, bread, cereal)

Months

\_\_\_\_\_  
(Child's age in months at introduction of wheat)

17. At what age did you first introduce the following foods to your child?

Soy/Tofu

- never  
 not yet  
 unsure

Soja/Tofu

17. At what age did you first introduce the following foods to your child?

Soy/Tofu

Years

\_\_\_\_\_ (Child's age in years at introduction of soy)

17. At what age did you first introduce the following foods to your child?

Soy/Tofu

Months

\_\_\_\_\_ (Child's age in months at introduction of soy)

17. At what age did you first introduce the following foods to your child?

Seeds (ie sesame, sunflower, pumpkin)

- never  
 not yet  
 unsure

Semillas

17. At what age did you first introduce the following foods to your child?

Seeds (ie sesame, sunflower, pumpkin)

Years

\_\_\_\_\_ (Child's age in years at introduction of seeds)

17. At what age did you first introduce the following foods to your child?

Seeds (ie sesame, sunflower, pumpkin)

Months

\_\_\_\_\_ (Child's age in months at introduction of seeds)

18. During the first year of life or since birth if the child is less than 1 year old, what brands of skin oil or lotion (NOT SOAP) did you use on your child's skin?

Desde...ha nacido hasta su primer año, que tipo de crema o loción usaba Ud. Por su piel su ...?

- None  
 Yes, I remember  
 Yes, but I don't remember  
 Unsure

18. They are  
Skin Oil/Lotion #1

\_\_\_\_\_

18. They are  
Skin Oil/Lotion #2

\_\_\_\_\_

18. They are  
Skin Oil/Lotion #3

\_\_\_\_\_

18. They are  
Skin Oil/Lotion #4

\_\_\_\_\_

19. At present, does your child take any nutritional supplements or vitamins?

- Yes  
 No

¿Toma... algunas vitaminas o suplementos?

**19. If YES, on average how many days per week does your child take a nutritional supplement or vitamin?**

**¿Cuántas días por semana toma la vitamina?**

|                                                                                 | None                  | 1-2 days              | 3-4 days              | 5-6 days              | Everyday              | Unsure                |
|---------------------------------------------------------------------------------|-----------------------|-----------------------|-----------------------|-----------------------|-----------------------|-----------------------|
| Multivitamin/polyvisol /<br>Multivitamínica                                     | <input type="radio"/> | <input type="radio"/> | <input type="radio"/> | <input type="radio"/> | <input type="radio"/> | <input type="radio"/> |
| Multivitamin with iron (polyvisol<br>with iron) / Multivitamínica con<br>hierro | <input type="radio"/> | <input type="radio"/> | <input type="radio"/> | <input type="radio"/> | <input type="radio"/> | <input type="radio"/> |
| Trivisol                                                                        | <input type="radio"/> | <input type="radio"/> | <input type="radio"/> | <input type="radio"/> | <input type="radio"/> | <input type="radio"/> |
| Calcium / Calcio                                                                | <input type="radio"/> | <input type="radio"/> | <input type="radio"/> | <input type="radio"/> | <input type="radio"/> | <input type="radio"/> |
| Pediasure/Ensure                                                                | <input type="radio"/> | <input type="radio"/> | <input type="radio"/> | <input type="radio"/> | <input type="radio"/> | <input type="radio"/> |
| Other                                                                           | <input type="radio"/> | <input type="radio"/> | <input type="radio"/> | <input type="radio"/> | <input type="radio"/> | <input type="radio"/> |

Other specify:

**20a. At present, how often does your child eat the following foods per week?**

**Ahora, le diré una lista de comidas, y Ud. me dirá cuántas días por semana...los come?**

|                                                                                                                         | None                  | < 1 day               | 1-2 days              | 3-5 days              | 6-7 days              | Unsure                |
|-------------------------------------------------------------------------------------------------------------------------|-----------------------|-----------------------|-----------------------|-----------------------|-----------------------|-----------------------|
| Cow's milk/Dairy<br>Products/Cheese / Productos<br>Lácteos                                                              | <input type="radio"/> | <input type="radio"/> | <input type="radio"/> | <input type="radio"/> | <input type="radio"/> | <input type="radio"/> |
| Egg Whites / Huevos                                                                                                     | <input type="radio"/> | <input type="radio"/> | <input type="radio"/> | <input type="radio"/> | <input type="radio"/> | <input type="radio"/> |
| Peanut (Including peanut butter)<br>/ Maní (incluyendo<br>crema/mantequilla de maní)                                    | <input type="radio"/> | <input type="radio"/> | <input type="radio"/> | <input type="radio"/> | <input type="radio"/> | <input type="radio"/> |
| Tree Nuts (ie almond, cashew,<br>filbert/hazel, walnut, brazil,<br>macadamia, pecan, pine,<br>pistachio) / Otros nueces | <input type="radio"/> | <input type="radio"/> | <input type="radio"/> | <input type="radio"/> | <input type="radio"/> | <input type="radio"/> |
| Fish (ie salmon, tuna, catfish,<br>cod, flounder, halibut, trout,<br>bass) /Pescado                                     | <input type="radio"/> | <input type="radio"/> | <input type="radio"/> | <input type="radio"/> | <input type="radio"/> | <input type="radio"/> |
| Shellfish (ie shrimp, crab,<br>lobster, clam, oyster, mussels) /<br>Mariscos                                            | <input type="radio"/> | <input type="radio"/> | <input type="radio"/> | <input type="radio"/> | <input type="radio"/> | <input type="radio"/> |
| Wheat (ie pasta, bread, cereal) /<br>Productos de Trigo                                                                 | <input type="radio"/> | <input type="radio"/> | <input type="radio"/> | <input type="radio"/> | <input type="radio"/> | <input type="radio"/> |
| Soy/Tofu / Soja/Tofu                                                                                                    | <input type="radio"/> | <input type="radio"/> | <input type="radio"/> | <input type="radio"/> | <input type="radio"/> | <input type="radio"/> |

|                                                           |                       |                       |                       |                       |                       |                       |
|-----------------------------------------------------------|-----------------------|-----------------------|-----------------------|-----------------------|-----------------------|-----------------------|
| Seeds (ie sesame, sunflower, pumpkin) / Semillas          | <input type="radio"/> | <input type="radio"/> | <input type="radio"/> | <input type="radio"/> | <input type="radio"/> | <input type="radio"/> |
| Green vegetables /Verduras Verdes                         | <input type="radio"/> | <input type="radio"/> | <input type="radio"/> | <input type="radio"/> | <input type="radio"/> | <input type="radio"/> |
| Orange veggies (carrots, squash, etc) / Verduras Naranjas | <input type="radio"/> | <input type="radio"/> | <input type="radio"/> | <input type="radio"/> | <input type="radio"/> | <input type="radio"/> |
| Fruits / Frutas                                           | <input type="radio"/> | <input type="radio"/> | <input type="radio"/> | <input type="radio"/> | <input type="radio"/> | <input type="radio"/> |
| Meats / Carnes                                            | <input type="radio"/> | <input type="radio"/> | <input type="radio"/> | <input type="radio"/> | <input type="radio"/> | <input type="radio"/> |
| Beans / Frijoles                                          | <input type="radio"/> | <input type="radio"/> | <input type="radio"/> | <input type="radio"/> | <input type="radio"/> | <input type="radio"/> |
| Rice / Arroz                                              | <input type="radio"/> | <input type="radio"/> | <input type="radio"/> | <input type="radio"/> | <input type="radio"/> | <input type="radio"/> |
| Calcium-fortified Juice / Jugo de naranja con calcio      | <input type="radio"/> | <input type="radio"/> | <input type="radio"/> | <input type="radio"/> | <input type="radio"/> | <input type="radio"/> |

20b. At present, how often does your child eat breakfast per week?

¿Come...el desayuno todos los días?

- None  
 < 1 day  
 1-2 days  
 3-5 days  
 6-7 days  
 Unsure

21. Does your child have Eczema?

¿Ha tenido eccema?

- No  
 Yes, he/she has it now  
 Yes, only when she/he was a baby, but outgrew  
 Unsure

By what age did your child outgrow his/her Eczema?  
Years

\_\_\_\_\_ (child's age in YEARS when eczema was outgrown)

By what age did your child outgrow his/her Eczema?  
Months

\_\_\_\_\_ (child's age in MONTHS when eczema was outgrown)

If YES, was your child's eczema diagnosed by a doctor?

¿Fue diagnosticado por un doctor?

- No  
 Yes  
 Unsure

How old was your child when first diagnosed by a doctor?

¿Cuándo?

- Yes, I remember  
 Unsure

Age IN YEARS when eczema first diagnosed by a doctor

\_\_\_\_\_ (age in years)

Age IN MONTHS when eczema first diagnosed by a doctor

\_\_\_\_\_ (age in months)

22. Have you ever used a steroid cream (like hydrocortisone cream or triamcinolone cream, including creams, lotions, and ointments containing steroids) on your child's skin?

- No  
 Yes  
 Unsure

¿Ha usado...una crema que tiene esteroides (como hidrocortisona) en su piel?

23. Does your child have asthma?

- No  
 Yes, he/she has it now  
 Yes, only when she/he was a baby, but outgrew  
 Unsure

¿Ha tenido ... asma?

By what age did your child outgrow his/her asthma?  
Years

\_\_\_\_\_ (child's age in YEARS when asthma was outgrown)

By what age did your child outgrow his/her asthma?  
Months

\_\_\_\_\_ (child's age in MONTHS when asthma was outgrown)

If YES, was your child's asthma diagnosed by a doctor?

- No  
 Yes  
 Unsure

¿Fue diagnosticado por un doctor?

How old was your child when first diagnosed by a doctor?

- Yes, I remember  
 Unsure

¿Cuándo?

How old was your child when first diagnosed by a doctor?  
Years

\_\_\_\_\_ (child's age in YEARS when asthma was first diagnosed)

How old was your child when first diagnosed by a doctor?  
Months

\_\_\_\_\_ (child's age in MONTHS when asthma was first diagnosed)

24. Has your child ever used an inhaler or a nebulizer?

- Yes  
 No  
 Unsure

¿Ha usado.. un inhalador o nebulizador?

25. Does your child have hay fever or seasonal allergies?

- No  
 Yes, he/she has it now  
 Yes, only when she/he was a baby, but outgrew  
 Unsure

¿Tiene alergias estacionales?

By what age did your child outgrow his/her hay fever or seasonal allergies?  
Years

\_\_\_\_\_ (child's age in YEARS when hayfever or seasonal allergies was outgrown)

By what age did your child outgrow his/her hay fever or seasonal allergies?

Months

(child's age in MONTHS when hayfever or seasonal allergies was outgrown)

If YES, was your child's hay fever ever diagnosed by a doctor?

- Yes  
 No  
 Unsure

¿Fue diagnosticado por un doctor?

How old was your child when first diagnosed by a doctor?

- Yes, I remember  
 Unsure

¿Cuándo?

How old was your child when first diagnosed by a doctor?

Years

(child's age in YEARS when hayfever or seasonal allergies was first diagnosed)

How old was your child when first diagnosed by a doctor?

Months

(child's age in MONTHS when hayfever or seasonal allergies was first diagnosed)

Which season does your child have seasonal allergies? (select all that apply)

Primavera  
 Verano  
 Otoño  
 Invierno  
 Todo el año

- Spring  
 Summer  
 Autumn  
 Winter  
 Year round  
 Unsure

26. Does your child have pet allergies?

¿Tiene ... alergias a algunas animales?

- No  
 Yes, he/she has it now  
 Yes, only when she/he was a baby, but outgrew  
 Unsure

At what age did your child outgrow his/her pet allergies?

Years

(child's age in YEARS when pet allergies were outgrown)

At what age did your child outgrow his/her pet allergies?

Months

(child's age in MONTHS when pet allergies were outgrown)

If YES, what type of pet allergy? (select all that apply)

- Cat  
 Dog  
 Other  
 Unsure

If OTHER, specify:

(name of other type of pet that child is allergic to)

If YES, was your child's pet allergy diagnosed by a doctor?

- No  
 Yes  
 Unsure

¿Fue diagnosticado por un doctor?

How old was your child when first diagnosed by a doctor?

- Yes, I remember  
 Unsure

¿Cuándo?

How old was your child when first diagnosed by a doctor?

Years (child's age in YEARS when pet allergies were first diagnosed)

How old was your child when first diagnosed by a doctor?

Months (child's age in MONTHS when pet allergies were first diagnosed)

27. Has your child ever used anti-allergy medication? (ie Benadryl, Zyrtec, Claritin, Atarax, Dimetapp)

- Yes  
 No  
 Unsure

¿Ha usado...medicina anti alergia?

28. Does your child have any drug allergies?

- Yes  
 No  
 Unsure

¿Ha tiene alergia a medicina o drogas?

If yes, specify the drug (use "," to separate):

\_\_\_\_\_

If YES, was your child's drug allergy diagnosed by a doctor?

- Yes  
 No  
 Unsure

¿Fue diagnosticado por un doctor?

How old was your child when first diagnosed by a doctor?

- Yes, I remember  
 Unsure

¿Cuándo?

How old was your child when first diagnosed by a doctor?

Years (child's age in YEARS when drug allergy was first diagnosed)

How old was your child when first diagnosed by a doctor?

Months (child's age in MONTHS when drug allergy was first diagnosed)

29. Is your child G6PD deficient?

- Yes  
 No  
 Unsure

¿Tiene...una deficiencia de G6PD?

30. Is your child allergic to insect stings?  Yes  
 No  
 Don't know/Child has never been stung

¿Ha sido...picado por una abeja o una avispa?  
 ¿Tuvo una reacción alérgica?

If yes, 1) what type of insect?  Bee  
 Wasp  
 Yellow Jacket

¿Cuál tipo de insecto?

If yes, 2) Is it a severe allergy (that is, difficulty breathing, need epi pen or to go to the hospital)?  Yes  
 No  
 Unsure

¿Es una alergia muy grave?

31. Has your child ever used medications for gastrointestinal upset?  Yes  
 No  
 Unsure

¿Ha usado...alguna medicina por el dolor de estómago?

If YES, which of the following medications did he/she take?

Antacids (Mylants, Roloids, TUMS, Pepto-Bismol)  
 H2 Blockers  
 Proton Pump inhibitors (Aciphex, Prilosec, Preveacid, Nexium)  
 Prokinetic agents (Urecholine, Reglin, Erythromycin)  
 Unsure  
 Other

If Others, specify:

\_\_\_\_\_

32. Is your child allergic to any food(s) at present?  Yes  
 No

¿Está...actualmente alérgico(a) a algunas comidas?

33. Has your child ever been allergic to any foods in the past that they have since outgrown?  Yes  
 No

¿Ha tenido...alguna alergia en el pasado?

Allergy to Dairy products / Cheese / Milk Current, Outgrown, Never?  Never  
 Current  
 Outgrown

If Current/Outgrown, how old was your child when you first noticed his/her food allergy (to Dairy products/Cheese/Milk)?  
 Years \_\_\_\_\_ (child's age in years when parent first noticed milk FA)

¿Cuándo notó por primera vez la alergia?

If Current/Outgrown, how old was your child when you first noticed his/her food allergy (to Dairy products/Cheese/Milk)?  
 Months \_\_\_\_\_ (child's age in months when parent first noticed milk FA)

¿Cuándo notó por primera vez la alergia?



---

If Outgrown, at what age?  
Years

\_\_\_\_\_ (child's age in years when he/she outgrew milk FA)

¿Cuándo superó la alergia?

---

If Outgrown, at what age?  
Months

\_\_\_\_\_ (child's age in months when he/she outgrew milk FA)

¿Cuándo superó la alergia?

---

Allergy to Egg  
Current, Outgrown, Never?

- Never  
 Current  
 Outgrown
- 

If Current/Outgrown, how old was your child when you  
first noticed his/her food allergy (to Egg)?  
Years

\_\_\_\_\_ (child's age in years when parent first noticed egg  
FA)

If Current/Outgrown, how old was your child when you  
first noticed his/her food allergy (to Egg)?  
Months

\_\_\_\_\_ (child's age in months when parent first noticed  
egg FA)

---

If Outgrown, at what age?  
Years

\_\_\_\_\_ (child's age in years when he/she outgrew egg FA)

---

If Outgrown, at what age?  
Months

\_\_\_\_\_ (child's age in months when he/she outgrew egg FA)

---

Allergy to Peanuts  
Current, Outgrown, Never?

- Never  
 Current  
 Outgrown
- 

If Current/Outgrown, how old was your child when you  
first noticed his/her food allergy (to Peanuts)?  
Years

\_\_\_\_\_ (child's age in years when parent first noticed  
peanut FA)

If Current/Outgrown, how old was your child when you  
first noticed his/her food allergy (to Peanuts)?  
Months

\_\_\_\_\_ (child's age in months when parent first noticed  
peanut FA)

---

If Outgrown, at what age?  
Years

\_\_\_\_\_ (child's age in years when he/she outgrew peanut  
FA)

---

If Outgrown, at what age?  
Months

\_\_\_\_\_ (child's age in months when he/she outgrew peanut  
FA)

---

Allergy to Tree Nuts  
Current, Outgrown, Never?

- Never  
 Current  
 Outgrown

If Current/Outgrown, how old was your child when you first noticed his/her food allergy (to Tree Nuts)?  
Years

\_\_\_\_\_  
(child's age in years when parent first noticed tree nut FA)

If Current/Outgrown, how old was your child when you first noticed his/her food allergy (to Tree Nuts)?  
Months

\_\_\_\_\_  
(child's age in months when parent first noticed tree nut FA)

If CURRENT, please choose the specific type (select all that apply):

- Almond  
 Cashew  
 Filbert/hazel  
 Walnut  
 Brazil  
 Macadamia  
 Pecan  
 Pine  
 Pistachio  
 Other

If OUTGROWN, at what age?  
Years

\_\_\_\_\_  
(child's age in years when he/she outgrew treenut FA)

If OUTGROWN, at what age?  
Months

\_\_\_\_\_  
(child's age in months when he/she outgrew treenut FA)

If OUTGROWN, please choose the specific type (select all that apply):

- Almond  
 Cashew  
 Filbert/hazel  
 Walnut  
 Brazil  
 Macadamia  
 Pecan  
 Pine  
 Pistachio  
 Other

Allergy to Fish  
Current, Outgrown, Never?

- Never  
 Current  
 Outgrown

If Current/Outgrown, how old was your child when you first noticed his/her food allergy (to Fish)?  
Years

\_\_\_\_\_  
(child's age in years when parent first noticed fish FA)

If Current/Outgrown, how old was your child when you first noticed his/her food allergy (to Fish)?  
Months

\_\_\_\_\_  
(child's age in months when parent first noticed fish FA)

If CURRENT, please choose the specific type (select all that apply)

- Salmon  
 Tuna  
 Catfish  
 Cod  
 Flounder  
 Halibut  
 Trout  
 Bass

If CURRENT, other type of fish child is allergic to?

\_\_\_\_\_

If OUTGROWN, at what age?  
Years

\_\_\_\_\_ (child's age in years when he/she outgrew fish FA)

If OUTGROWN, at what age?  
Months

\_\_\_\_\_ (child's age in months when he/she outgrew fish FA)

If OUTGROWN, please choose the specific type (select all that apply)

- Salmon  
 Tuna  
 Catfish  
 Cod  
 Flounder  
 Halibut  
 Trout  
 Bass

If OUTGROWN, other type of fish that child was allergic to?

\_\_\_\_\_

Allergy to Shellfish  
Current, Outgrown, Never?

- Never  
 Current  
 Outgrown

If Current/Outgrown, how old was your child when you first noticed his/her food allergy (to Shellfish)?  
Years

\_\_\_\_\_ (child's age in years when parent first noticed shellfish FA)

If Current/Outgrown, how old was your child when you first noticed his/her food allergy (to Shellfish)?  
Months

\_\_\_\_\_ (child's age in months when parent first noticed shellfish FA)

If CURRENT, please choose the specific type (select all that apply)

- Shrimp  
 Crab  
 Lobster  
 Clam  
 Oyster  
 Mussels

If OUTGROWN, at what age?  
Years

\_\_\_\_\_ (child's age in years when he/she outgrew shellfish FA)

---

If OUTGROWN, at what age?

Months

\_\_\_\_\_ (child's age in months when he/she outgrew shellfish FA)

---

If OUTGROWN, please choose the specific type (select all that apply)

- Shrimp  
 Crab  
 Lobster  
 Clam  
 Oyster  
 Mussels
- 

Allergy to Wheat

Current, Outgrown, Never?

- Never  
 Current  
 Outgrown
- 

If Current/Outgrown, how old was your child when you first noticed his/her food allergy (to Wheat)?

Years

\_\_\_\_\_ (child's age in years when parent first noticed wheat FA)

---

If Current/Outgrown, how old was your child when you first noticed his/her food allergy (to Wheat)?

Months

\_\_\_\_\_ (child's age in months when parent first noticed wheat FA)

---

If OUTGROWN, at what age?

Years

\_\_\_\_\_ (child's age in years when he/she outgrew wheat FA)

---

If OUTGROWN, at what age?

Months

\_\_\_\_\_ (child's age in months when he/she outgrew wheat FA)

---

Allergy to Soy/Tofu

Current, Outgrown, Never?

- Never  
 Current  
 Outgrown
- 

If Current/Outgrown, how old was your child when you first noticed his/her food allergy (to Soy/Tofu)?

Years

\_\_\_\_\_ (child's age in years when parent first noticed soy/tofu FA)

---

If Current/Outgrown, how old was your child when you first noticed his/her food allergy (to Soy/Tofu)?

Months

\_\_\_\_\_ (child's age in months when parent first noticed soy/tofu FA)

---

If OUTGROWN, at what age?

Years

\_\_\_\_\_ (child's age in years when he/she outgrew soy FA)

---

If OUTGROWN, at what age?

Months

\_\_\_\_\_ (child's age in months when he/she outgrew soy FA)

---

Allergy to Seeds  
Current, Outgrown, Never?

Never  
 Current  
 Outgrown

If Current/Outgrown, how old was your child when you first noticed his/her food allergy (to Seeds)?  
Years

\_\_\_\_\_  
(child's age in years when parent first noticed seed FA)

If Current/Outgrown, how old was your child when you first noticed his/her food allergy (to Seeds)?  
Months

\_\_\_\_\_  
(child's age in months when parent first noticed seed FA)

If CURRENT, please choose the specific type (select all that apply)

Sesame  
 Sunflower  
 Pumpkin

If CURRENT, name of other type of seed that child is allergic to?

\_\_\_\_\_

If OUTGROWN, at what age?  
Years

\_\_\_\_\_  
(child's age in years when he/she outgrew seed FA)

If OUTGROWN, at what age?  
Months

\_\_\_\_\_  
(child's age in months when he/she outgrew seed FA)

If OUTGROWN, please choose the specific type (select all that apply):

Sesame  
 Sunflower  
 Pumpkin

If OUTGROWN, other type of seed child is allergic to?

\_\_\_\_\_

Specify Other Food Allergy #1:

\_\_\_\_\_  
(name of other food #1 child is allergic to)

Other Food Allergy #1  
Current or Outgrown?

Current  
 Outgrown

Other Food Allergy #1  
How old was your child when you first noticed his/her food allergy?  
Years

\_\_\_\_\_  
(child's age in years when parent first noticed food #1 FA)

Other Food Allergy #1  
How old was your child when you first noticed his/her food allergy?  
Months

\_\_\_\_\_  
(child's age in months when parent first noticed food #1 FA)

Other Food Allergy #1  
If OUTGROWN, at what age?  
Years

\_\_\_\_\_  
(child's age in years when he/she outgrew food #1 FA)

---

Other Food Allergy #1  
If OUTGROWN, at what age?  
Months

\_\_\_\_\_  
(child's age in months when he/she outgrew food #1  
FA)

---

Specify Other Food Allergy #2:

\_\_\_\_\_  
(name of other food #2 child is allergic to)

---

Other Food Allergy #2  
Current or Outgrown?

Current  
 Outgrown

---

Other Food Allergy #2  
How old was your child when you first noticed his/her  
food allergy?  
Years

\_\_\_\_\_  
(child's age in years when parent first noticed  
food #2 FA)

---

Other Food Allergy #2  
How old was your child when you first noticed his/her  
food allergy?  
Months

\_\_\_\_\_  
(child's age in months when parent first noticed  
food #2 FA)

---

If OUTGROWN, at what age?  
Years

\_\_\_\_\_  
(child's age in years when he/she outgrew food #2  
FA)

---

If OUTGROWN, at what age?  
Months

\_\_\_\_\_  
(child's age in months when he/she outgrew food #2  
FA)

---

Specify Other Food Allergy #3:

\_\_\_\_\_  
(name of other food #3 child is allergic to)

---

Other Food Allergy #3  
Current or Outgrown?

Current  
 Outgrown

---

Other Food Allergy #3  
How old was your child when you first noticed his/her  
food allergy?  
Years

\_\_\_\_\_  
(child's age in years when parent first noticed  
food #3 FA)

---

Other Food Allergy #3  
How old was your child when you first noticed his/her  
food allergy?  
Months

\_\_\_\_\_  
(child's age in months when parent first noticed  
food #3 FA)

---

Other Food Allergy #3  
If Outgrown, at what age?  
Years

\_\_\_\_\_  
(child's age in years when he/she outgrew food #3  
FA)

---

Other Food Allergy #3  
If Outgrown, at what age?  
Months

\_\_\_\_\_  
(child's age in months when he/she outgrew food #3  
FA)

Specify Other Food Allergy #4:

\_\_\_\_\_  
(name of other food #4 child is allergic to)

Other Food Allergy #4  
Current or Outgrown?

- Current  
 Outgrown

Other Food Allergy #4  
How old was your child when you first noticed his/her  
food allergy?  
Years

\_\_\_\_\_  
(child's age in years when parent first noticed  
food #4 FA)

Other Food Allergy #4  
How old was your child when you first noticed his/her  
food allergy?  
Months

\_\_\_\_\_  
(child's age in months when parent first noticed  
food #4 FA)

Other Food Allergy #4  
If Outgrown, at what age?  
Years

\_\_\_\_\_  
(child's age in years when he/she outgrew food #4  
FA)

Other Food Allergy #4  
If Outgrown, at what age?  
Months

\_\_\_\_\_  
(child's age in years when he/she outgrew food #4  
FA)

Specify Other Food Allergy #5:

\_\_\_\_\_  
(name of other food #5 child is allergic to)

Other Food Allergy #5  
Current or Outgrown?

- Current  
 Outgrown

Other Food Allergy #5  
How old was your child when you first noticed his/her  
food allergy?  
Years

\_\_\_\_\_  
(child's age in years when parent first noticed  
food #5 FA)

Other Food Allergy #5  
How old was your child when you first noticed his/her  
food allergy?  
Months

\_\_\_\_\_  
(child's age in months when parent first noticed  
food #5 FA)

Other Food Allergy #5  
If Outgrown, at what age?  
Years

\_\_\_\_\_  
(child's age in years when he/she outgrew food #5  
FA)

Other Food Allergy #5  
If Outgrown, at what age?  
Months

\_\_\_\_\_  
(child's age in months when he/she outgrew food #5  
FA)

Specify Other Food Allergy #6:

\_\_\_\_\_  
(name of other food #6 child is allergic to)





**34. Specific symptoms of food allergy (through ingestion):****a. MOUTH****Peanut**

|                         | Check box if yes         |
|-------------------------|--------------------------|
| Lips Itching/Tingling   | <input type="checkbox"/> |
| Lips Swelling           | <input type="checkbox"/> |
| Tongue Itching/Tingling | <input type="checkbox"/> |
| Tongue Swelling         | <input type="checkbox"/> |

**34. Specific symptoms of food allergy (through ingestion):****a. MOUTH****Tree Nuts**

|                         | Check box if yes         |
|-------------------------|--------------------------|
| Lips Itching/Tingling   | <input type="checkbox"/> |
| Lips Swelling           | <input type="checkbox"/> |
| Tongue Itching/Tingling | <input type="checkbox"/> |
| Tongue Swelling         | <input type="checkbox"/> |

**34. Specific symptoms of food allergy (through ingestion):****a. MOUTH****Fish**

|                         | Check box if yes         |
|-------------------------|--------------------------|
| Lips Itching/Tingling   | <input type="checkbox"/> |
| Lips Swelling           | <input type="checkbox"/> |
| Tongue Itching/Tingling | <input type="checkbox"/> |
| Tongue Swelling         | <input type="checkbox"/> |

**34. Specific symptoms of food allergy (through ingestion):****a. MOUTH****Shellfish**

|                         | Check box if yes         |
|-------------------------|--------------------------|
| Lips Itching/Tingling   | <input type="checkbox"/> |
| Lips Swelling           | <input type="checkbox"/> |
| Tongue Itching/Tingling | <input type="checkbox"/> |
| Tongue Swelling         | <input type="checkbox"/> |

**34. Specific symptoms of food allergy (through ingestion):****a. MOUTH****Wheat**

|                       | Check box if yes         |
|-----------------------|--------------------------|
| Lips Itching/Tingling | <input type="checkbox"/> |
| Lips Swelling         | <input type="checkbox"/> |

Tongue Itching/Tingling

Tongue Swelling

**34. Specific symptoms of food allergy (through ingestion):**  
**a. MOUTH**  
**Soy/Tofu**

Check box if yes

Lips Itching/Tingling

Lips Swelling

Tongue Itching/Tingling

Tongue Swelling

**34. Specific symptoms of food allergy (through ingestion):**  
**a. MOUTH**  
**Seeds**

Check box if yes

Lips Itching/Tingling

Lips Swelling

Tongue Itching/Tingling

Tongue Swelling

34a. Name of Other Food Allergy #1 \_\_\_\_\_

**34. Specific symptoms of food allergy (through ingestion):**  
**a. MOUTH**  
**Other Food Allergy #1**

Check box if yes

Lips Itching/Tingling

Lips Swelling

Tongue Itching/Tingling

Tongue Swelling

34a. Name of Other Food Allergy #2 \_\_\_\_\_

**34. Specific symptoms of food allergy (through ingestion):**  
**a. MOUTH**  
**Other Food Allergy #2**

Check box if yes

Lips Itching/Tingling

Lips Swelling

Tongue Itching/Tingling

Tongue Swelling

---

34a. Name of Other Food Allergy #3 \_\_\_\_\_

**34. Specific symptoms of food allergy (through ingestion):**

**a. MOUTH**

**Other Food Allergy #3**

Check box if yes

Lips Itching/Tingling

Lips Swelling

Tongue Itching/Tingling

Tongue Swelling

---

34a. Name of Other Food Allergy #4 \_\_\_\_\_

**34. Specific symptoms of food allergy (through ingestion):**

**a. MOUTH**

**Other Food Allergy #4**

Check box if yes

Lips Itching/Tingling

Lips Swelling

Tongue Itching/Tingling

Tongue Swelling

---

34a. Name of Other Food Allergy #5 \_\_\_\_\_

**34. Specific symptoms of food allergy (through ingestion):**

**a. MOUTH**

**Other Food Allergy #5**

Check box if yes

Lips Itching/Tingling

Lips Swelling

Tongue Itching/Tingling

Tongue Swelling

---

34a. Name of Other Food Allergy #6 \_\_\_\_\_

**34. Specific symptoms of food allergy (through ingestion):****a. MOUTH****Other Food Allergy #6**

|                         | Check box if yes      |
|-------------------------|-----------------------|
| Lips Itching/Tingling   | <input type="radio"/> |
| Lips Swelling           | <input type="radio"/> |
| Tongue Itching/Tingling | <input type="radio"/> |
| Tongue Swelling         | <input type="radio"/> |

**34. Specific symptoms of food allergy (through ingestion):****b/c. EYE/NOSE / Síntomas de ojos/ nariz****Cow's Milk/Dairy Products/Cheese**

|                                         | Check box if yes         |
|-----------------------------------------|--------------------------|
| Red/Watery/Itchy Eye / Ojo rojo/picazón | <input type="checkbox"/> |
| Swollen Eye / Ojo hinchado              | <input type="checkbox"/> |
| Stuffy/Runny Nose / Congestión nasal    | <input type="checkbox"/> |
| Sneezing / Estornudo                    | <input type="checkbox"/> |
| Itchy Nose / Picazón en la nariz        | <input type="checkbox"/> |

**34. Specific symptoms of food allergy (through ingestion):****b/c. EYE/NOSE****Egg**

|                      | Check box if yes         |
|----------------------|--------------------------|
| Red/Watery/Itchy Eye | <input type="checkbox"/> |
| Swollen Eye          | <input type="checkbox"/> |
| Stuffy/Runny Nose    | <input type="checkbox"/> |
| Sneezing             | <input type="checkbox"/> |
| Itchy Nose           | <input type="checkbox"/> |

**34. Specific symptoms of food allergy (through ingestion):****b/c. EYE/NOSE****Peanut**

|                      | Check box if yes         |
|----------------------|--------------------------|
| Red/Watery/Itchy Eye | <input type="checkbox"/> |
| Swollen Eye          | <input type="checkbox"/> |
| Stuffy/Runny Nose    | <input type="checkbox"/> |
| Sneezing             | <input type="checkbox"/> |
| Itchy Nose           | <input type="checkbox"/> |

**34. Specific symptoms of food allergy (through ingestion):****b/c. EYE/NOSE****Tree Nuts**

|                      | Check box if yes         |
|----------------------|--------------------------|
| Red/Watery/Itchy Eye | <input type="checkbox"/> |
| Swollen Eye          | <input type="checkbox"/> |
| Stuffy/Runny Nose    | <input type="checkbox"/> |
| Sneezing             | <input type="checkbox"/> |
| Itchy Nose           | <input type="checkbox"/> |

**34. Specific symptoms of food allergy (through ingestion):****b/c. EYE/NOSE****Fish**

|                      | Check box if yes         |
|----------------------|--------------------------|
| Red/Watery/Itchy Eye | <input type="checkbox"/> |
| Swollen Eye          | <input type="checkbox"/> |
| Stuffy/Runny Nose    | <input type="checkbox"/> |
| Sneezing             | <input type="checkbox"/> |
| Itchy Nose           | <input type="checkbox"/> |

**34. Specific symptoms of food allergy (through ingestion):****b/c. EYE/NOSE****Shellfish**

|                      | Check box if yes         |
|----------------------|--------------------------|
| Red/Watery/Itchy Eye | <input type="checkbox"/> |
| Swollen Eye          | <input type="checkbox"/> |
| Stuffy/Runny Nose    | <input type="checkbox"/> |
| Sneezing             | <input type="checkbox"/> |
| Itchy Nose           | <input type="checkbox"/> |

**34. Specific symptoms of food allergy (through ingestion):****b/c. EYE/NOSE****Wheat**

|                      | Check box if yes         |
|----------------------|--------------------------|
| Red/Watery/Itchy Eye | <input type="checkbox"/> |
| Swollen Eye          | <input type="checkbox"/> |
| Stuffy/Runny Nose    | <input type="checkbox"/> |
| Sneezing             | <input type="checkbox"/> |
| Itchy Nose           | <input type="checkbox"/> |

**34. Specific symptoms of food allergy (through ingestion):****b/c. EYE/NOSE****Soy/Tofu**

|                      | Check box if yes         |
|----------------------|--------------------------|
| Red/Watery/Itchy Eye | <input type="checkbox"/> |
| Swollen Eye          | <input type="checkbox"/> |
| Stuffy/Runny Nose    | <input type="checkbox"/> |
| Sneezing             | <input type="checkbox"/> |
| Itchy Nose           | <input type="checkbox"/> |

**34. Specific symptoms of food allergy (through ingestion):****b/c. EYE/NOSE****Seeds**

|                      | Check box if yes         |
|----------------------|--------------------------|
| Red/Watery/Itchy Eye | <input type="checkbox"/> |
| Swollen Eye          | <input type="checkbox"/> |
| Stuffy/Runny Nose    | <input type="checkbox"/> |
| Sneezing             | <input type="checkbox"/> |
| Itchy Nose           | <input type="checkbox"/> |

34b/c. Name of Other Food Allergy #1

\_\_\_\_\_

**34. Specific symptoms of food allergy (through ingestion):****b/c. EYE/NOSE****Other Food Allergy #1**

|                      | Check box if yes         |
|----------------------|--------------------------|
| Red/Watery/Itchy Eye | <input type="checkbox"/> |
| Swollen Eye          | <input type="checkbox"/> |
| Stuffy/Runny Nose    | <input type="checkbox"/> |
| Sneezing             | <input type="checkbox"/> |
| Itchy Nose           | <input type="checkbox"/> |

34b/c. Name of Other Food Allergy #2

\_\_\_\_\_

**34. Specific symptoms of food allergy (through ingestion):****b/c. EYE/NOSE****Other Food Allergy #2**

|                      | Check box if yes         |
|----------------------|--------------------------|
| Red/Watery/Itchy Eye | <input type="checkbox"/> |

- Swollen Eye
- Stuffy/Runny Nose
- Sneezing
- Itchy Nose

34b/c. Name of Other Food Allergy #3 \_\_\_\_\_

**34. Specific symptoms of food allergy (through ingestion):**

**b/c. EYE/NOSE**

**Other Food Allergy #3**

Check box if yes

- Red/Watery/Itchy Eye
- Swollen Eye
- Stuffy/Runny Nose
- Sneezing
- Itchy Nose

34b/c. Name of Other Food Allergy #4 \_\_\_\_\_

**34. Specific symptoms of food allergy (through ingestion):**

**b/c. EYE/NOSE**

**Other Food Allergy #4**

Check box if yes

- Red/Watery/Itchy Eye
- Swollen Eye
- Stuffy/Runny Nose
- Sneezing
- Itchy Nose

34b/c. Name of Other Food Allergy #5 \_\_\_\_\_

**34. Specific symptoms of food allergy (through ingestion):**

**b/c. EYE/NOSE**

**Other Food Allergy #5**

Check box if yes

- Red/Watery/Itchy Eye
- Swollen Eye
- Stuffy/Runny Nose

Sneezing

Itchy Nose

34b/c. Name of Other Food Allergy #6 \_\_\_\_\_

**34. Specific symptoms of food allergy (through ingestion):**

**b/c. EYE/NOSE**

**Other Food Allergy #6**

|                      | Check box if yes         |
|----------------------|--------------------------|
| Red/Watery/Itchy Eye | <input type="checkbox"/> |
| Swollen Eye          | <input type="checkbox"/> |
| Stuffy/Runny Nose    | <input type="checkbox"/> |
| Sneezing             | <input type="checkbox"/> |
| Itchy Nose           | <input type="checkbox"/> |

**34. Specific symptoms of food allergy (through ingestion):**

**d. THROAT / Síntomas de la garganta**

**Cow's Milk/Dairy Products/Cheese**

|                                                                            | Check box if yes         |
|----------------------------------------------------------------------------|--------------------------|
| Itching and/or tightness in the throat / Picazón u opresión en la garganta | <input type="checkbox"/> |
| Hoarseness/change of voice / Voz ronco                                     | <input type="checkbox"/> |
| Choking/Difficulty Swallowing / Dificultad para deglutir                   | <input type="checkbox"/> |
| Throat Clearing / Limpiado de la garganta                                  | <input type="checkbox"/> |

**34. Specific symptoms of food allergy (through ingestion):**

**d. THROAT**

**Egg**

|                                        | Check box if yes      |
|----------------------------------------|-----------------------|
| Itching and/or tightness in the throat | <input type="radio"/> |
| Hoarseness/change of voice             | <input type="radio"/> |
| Choking/Difficulty Swallowing          | <input type="radio"/> |
| Throat Clearing                        | <input type="radio"/> |



**34. Specific symptoms of food allergy (through ingestion):****d. THROAT****Peanut**

|                                        | Check box if yes         |
|----------------------------------------|--------------------------|
| Itching and/or tightness in the throat | <input type="checkbox"/> |
| Hoarseness/change of voice             | <input type="checkbox"/> |
| Choking/Difficulty swallowing          | <input type="checkbox"/> |
| Throat Clearing                        | <input type="checkbox"/> |

**34. Specific symptoms of food allergy (through ingestion):****d. THROAT****Tree Nuts**

|                                        | Check box if yes         |
|----------------------------------------|--------------------------|
| Itching and/or tightness in the throat | <input type="checkbox"/> |
| Hoarseness/change of voice             | <input type="checkbox"/> |
| Choking/Difficulty Swallowing          | <input type="checkbox"/> |
| Throat Clearing                        | <input type="checkbox"/> |

**34. Specific symptoms of food allergy (through ingestion):****d. THROAT****Fish**

|                                        | Check box if yes         |
|----------------------------------------|--------------------------|
| Itching and/or tightness in the throat | <input type="checkbox"/> |
| Hoarseness/change of voice             | <input type="checkbox"/> |
| Choking/Difficulty Swallowing          | <input type="checkbox"/> |
| Throat Clearing                        | <input type="checkbox"/> |

**34. Specific symptoms of food allergy (through ingestion):****d. THROAT****Shellfish**

|                                        | Check box if yes         |
|----------------------------------------|--------------------------|
| Itching and/or tightness in the throat | <input type="checkbox"/> |
| Hoarseness/change of voice             | <input type="checkbox"/> |
| Choking/Difficulty Swallowing          | <input type="checkbox"/> |
| Throat Clearing                        | <input type="checkbox"/> |

**34. Specific symptoms of food allergy (through ingestion):****d. THROAT****Wheat**

|                                        | Check box if yes         |
|----------------------------------------|--------------------------|
| Itching and/or tightness in the throat | <input type="checkbox"/> |
| Hoarseness/change of voice             | <input type="checkbox"/> |
| Choking/Difficulty Swallowing          | <input type="checkbox"/> |
| Throat Clearing                        | <input type="checkbox"/> |

**34. Specific symptoms of food allergy (through ingestion):****d. THROAT****Soy/Tofu**

|                                        | Check box if yes         |
|----------------------------------------|--------------------------|
| Itching and/or tightness in the throat | <input type="checkbox"/> |
| Hoarseness/change of voice             | <input type="checkbox"/> |
| Choking/Difficulty Swallowing          | <input type="checkbox"/> |
| Throat Clearing                        | <input type="checkbox"/> |

**34. Specific symptoms of food allergy (through ingestion):****d. THROAT****Seeds**

|                                        | Check box if yes         |
|----------------------------------------|--------------------------|
| Itching and/or tightness in the throat | <input type="checkbox"/> |
| Hoarseness/change of voice             | <input type="checkbox"/> |
| Choking/Difficulty Swallowing          | <input type="checkbox"/> |
| Throat Clearing                        | <input type="checkbox"/> |

34d. Name of Other Food Allergy #1

\_\_\_\_\_

**34. Specific symptoms of food allergy (through ingestion):****d. THROAT****Other Food Allergy #1**

|                                        | Check box if yes         |
|----------------------------------------|--------------------------|
| Itching and/or tightness in the throat | <input type="checkbox"/> |
| Hoarseness/change of voice             | <input type="checkbox"/> |
| Choking/Difficulty Swallowing          | <input type="checkbox"/> |
| Throat Clearing                        | <input type="checkbox"/> |

34d. Name of Other Food Allergy #2

\_\_\_\_\_

**34. Specific symptoms of food allergy (through ingestion):****d. THROAT****Other Food Allergy #2**

|                                        | Check box if yes      |
|----------------------------------------|-----------------------|
| Itching and/or tightness in the throat | <input type="radio"/> |
| Hoarseness/change of voice             | <input type="radio"/> |
| Choking/Difficulty Swallowing          | <input type="radio"/> |
| Throat Clearing                        | <input type="radio"/> |

34d. Name of Other Food Allergy #3

\_\_\_\_\_

**34. Specific symptoms of food allergy (through ingestion):****d. THROAT****Other Food Allergy #3**

|                                        | Check box if yes      |
|----------------------------------------|-----------------------|
| Itching and/or tightness in the throat | <input type="radio"/> |
| Hoarseness/change of voice             | <input type="radio"/> |
| Choking/Difficulty Swallowing          | <input type="radio"/> |
| Throat Clearing                        | <input type="radio"/> |

34d. Name of Other Food Allergy #4

\_\_\_\_\_

**34. Specific symptoms of food allergy (through ingestion):****d. THROAT****Other Food Allergy #4**

|                                        | Check box if yes         |
|----------------------------------------|--------------------------|
| Itching and/or tightness in the throat | <input type="checkbox"/> |
| Hoarseness/change of voice             | <input type="checkbox"/> |
| Choking/Difficulty Swallowing          | <input type="checkbox"/> |
| Throat Clearing                        | <input type="checkbox"/> |

34d. Name of Other Food Allergy #5

\_\_\_\_\_

**34. Specific symptoms of food allergy (through ingestion):****d. THROAT****Other Food Allergy #5**

|                                        | Check box if yes         |
|----------------------------------------|--------------------------|
| Itching and/or tightness in the throat | <input type="checkbox"/> |
| Hoarseness/change of voice             | <input type="checkbox"/> |
| Choking/Difficulty Swallowing          | <input type="checkbox"/> |
| Throat Clearing                        | <input type="checkbox"/> |

34d. Name of Other Food Allergy #6 \_\_\_\_\_

**34. Specific symptoms of food allergy (through ingestion):****d. THROAT****Other Food Allergy #6**

|                                        | Check box if yes         |
|----------------------------------------|--------------------------|
| Itching and/or tightness in the throat | <input type="checkbox"/> |
| Hoarseness/change of voice             | <input type="checkbox"/> |
| Choking/Difficulty Swallowing          | <input type="checkbox"/> |
| Throat Clearing                        | <input type="checkbox"/> |

**34. Specific symptoms of food allergy (through ingestion):****e. SKIN / Síntomas de piel****Cow's Milk/Dairy Products/Cheese**

|                                                                               | Check box if yes         |
|-------------------------------------------------------------------------------|--------------------------|
| Itching / Picazón                                                             | <input type="checkbox"/> |
| Hives /Urticaria                                                              | <input type="checkbox"/> |
| Swelling of the face and/or extremities / Hinchazón de la cara o extremidades | <input type="checkbox"/> |
| Redness of the skin / Piel rojo                                               | <input type="checkbox"/> |

**34. Specific symptoms of food allergy (through ingestion):****e. SKIN****Egg**

|                                         | Check box if yes         |
|-----------------------------------------|--------------------------|
| Itching                                 | <input type="checkbox"/> |
| Hives                                   | <input type="checkbox"/> |
| Swelling of the face and/or extremities | <input type="checkbox"/> |

Redness of the skin

### 34. Specific symptoms of food allergy (through ingestion):

#### e. SKIN

#### Peanut

|                                         | Check box if yes         |
|-----------------------------------------|--------------------------|
| Itching                                 | <input type="checkbox"/> |
| Hives                                   | <input type="checkbox"/> |
| Swelling of the face and/or extremities | <input type="checkbox"/> |
| Redness of the skin                     | <input type="checkbox"/> |

### 34. Specific symptoms of food allergy (through ingestion):

#### e. SKIN

#### Treenut

|                                         | Check box if yes         |
|-----------------------------------------|--------------------------|
| Itching                                 | <input type="checkbox"/> |
| Hives                                   | <input type="checkbox"/> |
| Swelling of the face and/or extremities | <input type="checkbox"/> |
| Redness of the skin                     | <input type="checkbox"/> |

### 34. Specific symptoms of food allergy (through ingestion):

#### e. SKIN

#### Fish

|                                         | Check box if yes         |
|-----------------------------------------|--------------------------|
| Itching                                 | <input type="checkbox"/> |
| Hives                                   | <input type="checkbox"/> |
| Swelling of the face and/or extremities | <input type="checkbox"/> |
| Redness of the skin                     | <input type="checkbox"/> |

### 34. Specific symptoms of food allergy (through ingestion):

#### e. SKIN

#### Shellfish

|                                         | Check box if yes         |
|-----------------------------------------|--------------------------|
| Itching                                 | <input type="checkbox"/> |
| Hives                                   | <input type="checkbox"/> |
| Swelling of the face and/or extremities | <input type="checkbox"/> |
| Redness of the skin                     | <input type="checkbox"/> |

**34. Specific symptoms of food allergy (through ingestion):****e. SKIN****Wheat**

|                                         | Check box if yes         |
|-----------------------------------------|--------------------------|
| Itching                                 | <input type="checkbox"/> |
| Hives                                   | <input type="checkbox"/> |
| Swelling of the face and/or extremities | <input type="checkbox"/> |
| Redness of the skin                     | <input type="checkbox"/> |

**34. Specific symptoms of food allergy (through ingestion):****e. SKIN****Soy/Tofu**

|                                         | Check box if yes         |
|-----------------------------------------|--------------------------|
| Itching                                 | <input type="checkbox"/> |
| Hives                                   | <input type="checkbox"/> |
| Swelling of the face and/or extremities | <input type="checkbox"/> |
| Redness of the skin                     | <input type="checkbox"/> |

**34. Specific symptoms of food allergy (through ingestion):****e. SKIN****Seeds**

|                                         | Check box if yes         |
|-----------------------------------------|--------------------------|
| Itching                                 | <input type="checkbox"/> |
| Hives                                   | <input type="checkbox"/> |
| Swelling of the face and/or extremities | <input type="checkbox"/> |
| Redness of the skin                     | <input type="checkbox"/> |

34e. Name of Other Food Allergy #1

\_\_\_\_\_

**34. Specific symptoms of food allergy (through ingestion):****e. SKIN****Other Food Allergy #1**

|                                         | Check box if yes         |
|-----------------------------------------|--------------------------|
| Itching                                 | <input type="checkbox"/> |
| Hives                                   | <input type="checkbox"/> |
| Swelling of the face and/or extremities | <input type="checkbox"/> |
| Redness of the skin                     | <input type="checkbox"/> |

34e. Name of Other Food Allergy #2

\_\_\_\_\_

**34. Specific symptoms of food allergy (through ingestion):****e. SKIN****Other Food Allergy #2**

|                                         | Check box if yes         |
|-----------------------------------------|--------------------------|
| Itching                                 | <input type="checkbox"/> |
| Hives                                   | <input type="checkbox"/> |
| Swelling of the face and/or extremities | <input type="checkbox"/> |
| Redness of the skin                     | <input type="checkbox"/> |

34e. Name of Other Food Allergy #3

---

**34. Specific symptoms of food allergy (through ingestion):****e. SKIN****Other Food Allergy #3**

|                                         | Check box if yes         |
|-----------------------------------------|--------------------------|
| Itching                                 | <input type="checkbox"/> |
| Hives                                   | <input type="checkbox"/> |
| Swelling of the face and/or extremities | <input type="checkbox"/> |
| Redness of the skin                     | <input type="checkbox"/> |

34e. Name of Other Food Allergy #4

---

**34. Specific symptoms of food allergy (through ingestion):****e. SKIN****Other Food Allergy #4**

|                                         | Check box if yes         |
|-----------------------------------------|--------------------------|
| Itching                                 | <input type="checkbox"/> |
| Hives                                   | <input type="checkbox"/> |
| Swelling of the face and/or extremities | <input type="checkbox"/> |
| Redness of the skin                     | <input type="checkbox"/> |

34e. Name of Other Food Allergy #5

---

**34. Specific symptoms of food allergy (through ingestion):****e. SKIN****Other Food Allergy #5**

|                                         | Check box if yes         |
|-----------------------------------------|--------------------------|
| Itching                                 | <input type="checkbox"/> |
| Hives                                   | <input type="checkbox"/> |
| Swelling of the face and/or extremities | <input type="checkbox"/> |
| Redness of the skin                     | <input type="checkbox"/> |

34e. Name of Other Food Allergy #6 \_\_\_\_\_

**34. Specific symptoms of food allergy (through ingestion):****e. SKIN****Other Food Allergy #6**

|                                         | Check box if yes         |
|-----------------------------------------|--------------------------|
| Itching                                 | <input type="checkbox"/> |
| Hives                                   | <input type="checkbox"/> |
| Swelling of the face and/or extremities | <input type="checkbox"/> |
| Redness of the skin                     | <input type="checkbox"/> |

**34. Specific symptoms of food allergy (through ingestion):****f. LUNG / Síntomas de Pulmón****Cow's Milk/Dairy Products/Cheese**

|                                        | Check box if yes         |
|----------------------------------------|--------------------------|
| Shortness of breath / Falta de aliento | <input type="checkbox"/> |
| Repetitive coughing / Tos repetitiva   | <input type="checkbox"/> |
| Wheezing / Aliento ruidoso             | <input type="checkbox"/> |
| Chest Tightness / Opresión en el pecho | <input type="checkbox"/> |

**34. Specific symptoms of food allergy (through ingestion):****f. LUNG****Egg**

|                     | Check box if yes         |
|---------------------|--------------------------|
| Shortness of breath | <input type="checkbox"/> |
| Repetitive coughing | <input type="checkbox"/> |
| Wheezing            | <input type="checkbox"/> |



Chest Tightness

**34. Specific symptoms of food allergy (through ingestion):**

**f. LUNG**

**Peanut**

|                     | Check box if yes         |
|---------------------|--------------------------|
| Shortness of breath | <input type="checkbox"/> |
| Repetitive coughing | <input type="checkbox"/> |
| Wheezing            | <input type="checkbox"/> |
| Chest Tightness     | <input type="checkbox"/> |

**34. Specific symptoms of food allergy (through ingestion):**

**f. LUNG**

**Treenut**

|                     | Check box if yes         |
|---------------------|--------------------------|
| Shortness of breath | <input type="checkbox"/> |
| Repetitive Coughing | <input type="checkbox"/> |
| Wheezing            | <input type="checkbox"/> |
| Chest Tightness     | <input type="checkbox"/> |

**34. Specific symptoms of food allergy (through ingestion):**

**f. LUNG**

**Fish**

|                     | Check box if yes         |
|---------------------|--------------------------|
| Shortness of breath | <input type="checkbox"/> |
| Repetitive coughing | <input type="checkbox"/> |
| Wheezing            | <input type="checkbox"/> |
| Chest Tightness     | <input type="checkbox"/> |

**34. Specific symptoms of food allergy (through ingestion):**

**f. LUNG**

**Shellfish**

|                     | Check box if yes         |
|---------------------|--------------------------|
| Shortness of breath | <input type="checkbox"/> |
| Repetitive coughing | <input type="checkbox"/> |
| Wheezing            | <input type="checkbox"/> |
| Chest Tightness     | <input type="checkbox"/> |

**34. Specific symptoms of food allergy (through ingestion):****f. LUNG****Wheat**

Check box if yes

|                     |                          |
|---------------------|--------------------------|
| Shortness of breath | <input type="checkbox"/> |
| Repetitive coughing | <input type="checkbox"/> |
| Wheezing            | <input type="checkbox"/> |
| Chest Tightness     | <input type="checkbox"/> |

**34. Specific symptoms of food allergy (through ingestion):****f. LUNG****Soy/Tofu**

Check box if yes

|                     |                          |
|---------------------|--------------------------|
| Shortness of breath | <input type="checkbox"/> |
| Repetitive coughing | <input type="checkbox"/> |
| Wheezing            | <input type="checkbox"/> |
| Chest Tightness     | <input type="checkbox"/> |

**34. Specific symptoms of food allergy (through ingestion):****f. LUNG****Seeds**

Check box if yes

|                     |                          |
|---------------------|--------------------------|
| Shortness of breath | <input type="checkbox"/> |
| Repetitive coughing | <input type="checkbox"/> |
| Wheezing            | <input type="checkbox"/> |
| Chest Tightness     | <input type="checkbox"/> |

34f. Name of Other Food Allergy #1

\_\_\_\_\_

**34. Specific symptoms of food allergy (through ingestion):****f. LUNG****Other Food Allergy #1**

Check box if yes

|                     |                          |
|---------------------|--------------------------|
| Shortness of breath | <input type="checkbox"/> |
| Repetitive coughing | <input type="checkbox"/> |
| Wheezing            | <input type="checkbox"/> |
| Chest Tightness     | <input type="checkbox"/> |

34f. Name of Other Food Allergy #2

\_\_\_\_\_

**34. Specific symptoms of food allergy (through ingestion):****f. LUNG****Other Food Allergy #2**

|                     | Check box if yes         |
|---------------------|--------------------------|
| Shortness of breath | <input type="checkbox"/> |
| Repetitive coughing | <input type="checkbox"/> |
| Wheezing            | <input type="checkbox"/> |
| Chest Tightness     | <input type="checkbox"/> |

34f. Name of Other Food Allergy #3

**34. Specific symptoms of food allergy (through ingestion):****f. LUNG****Other Food Allergy #3**

|                     | Check box if yes         |
|---------------------|--------------------------|
| Shortness of breath | <input type="checkbox"/> |
| Repetitive coughing | <input type="checkbox"/> |
| Wheezing            | <input type="checkbox"/> |
| Chest Tightness     | <input type="checkbox"/> |

34f. Name of Other Food Allergy #4

**34. Specific symptoms of food allergy (through ingestion):****f. LUNG****Other Food Allergy #4**

|                     | Check box if yes         |
|---------------------|--------------------------|
| Shortness of breath | <input type="checkbox"/> |
| Repetitive coughing | <input type="checkbox"/> |
| Wheezing            | <input type="checkbox"/> |
| Chest Tightness     | <input type="checkbox"/> |

34f. Name of Other Food Allergy #5

**34. Specific symptoms of food allergy (through ingestion):****f. LUNG****Other Food Allergy #5**

|                     | Check box if yes         |
|---------------------|--------------------------|
| Shortness of breath | <input type="checkbox"/> |

|                     |                          |
|---------------------|--------------------------|
| Repetitive coughing | <input type="checkbox"/> |
| Wheezing            | <input type="checkbox"/> |
| Chest Tightness     | <input type="checkbox"/> |

34f. Name of Other Food Allergy #6 \_\_\_\_\_

### 34. Specific symptoms of food allergy (through ingestion):

#### f. LUNG

##### Other Food Allergy #6

|                     | Check box if yes         |
|---------------------|--------------------------|
| Shortness of breath | <input type="checkbox"/> |
| Repetitive coughing | <input type="checkbox"/> |
| Wheezing            | <input type="checkbox"/> |
| Chest Tightness     | <input type="checkbox"/> |

### 34. Specific symptoms of food allergy (through ingestion):

#### g. GUT / Síntomas de tripa / intestino

##### Cow's Milk/Dairy Products/Cheese

|                                                        | Check box if yes         |
|--------------------------------------------------------|--------------------------|
| Stomach cramps/pain / Dolor de estómago                | <input type="checkbox"/> |
| Nausea / Náusea                                        | <input type="checkbox"/> |
| Vomiting / Vómito                                      | <input type="checkbox"/> |
| Diarrhea / Diarrea                                     | <input type="checkbox"/> |
| Bloating (swelling, gassy feeling) / Estómago hinchado | <input type="checkbox"/> |

### 34. Specific symptoms of food allergy (through ingestion):

#### g. GUT

##### Egg

|                                    | Check box if yes         |
|------------------------------------|--------------------------|
| Stomach cramps/pain                | <input type="checkbox"/> |
| Nausea                             | <input type="checkbox"/> |
| Vomiting                           | <input type="checkbox"/> |
| Diarrhea                           | <input type="checkbox"/> |
| Bloating (swelling, gassy feeling) | <input type="checkbox"/> |

**34. Specific symptoms of food allergy (through ingestion):****g. GUT****Peanut**

|                                    | Check box if yes         |
|------------------------------------|--------------------------|
| Stomach cramps/pain                | <input type="checkbox"/> |
| Nausea                             | <input type="checkbox"/> |
| Vomiting                           | <input type="checkbox"/> |
| Diarrhea                           | <input type="checkbox"/> |
| Bloating (swelling, gassy feeling) | <input type="checkbox"/> |

**34. Specific symptoms of food allergy (through ingestion):****g. GUT****Tree Nuts**

|                                    | Check box if yes         |
|------------------------------------|--------------------------|
| Stomach cramps/pain                | <input type="checkbox"/> |
| Nausea                             | <input type="checkbox"/> |
| Vomiting                           | <input type="checkbox"/> |
| Diarrhea                           | <input type="checkbox"/> |
| Bloating (swelling, gassy feeling) | <input type="checkbox"/> |

**34. Specific symptoms of food allergy (through ingestion):****g. GUT****Fish**

|                                    | Check box if yes         |
|------------------------------------|--------------------------|
| Stomach cramps/pain                | <input type="checkbox"/> |
| Nausea                             | <input type="checkbox"/> |
| Vomiting                           | <input type="checkbox"/> |
| Diarrhea                           | <input type="checkbox"/> |
| Bloating (swelling, gassy feeling) | <input type="checkbox"/> |

**34. Specific symptoms of food allergy (through ingestion):****g. GUT****Shellfish**

|                                    | Check box if yes         |
|------------------------------------|--------------------------|
| Stomach cramps/pain                | <input type="checkbox"/> |
| Nausea                             | <input type="checkbox"/> |
| Vomiting                           | <input type="checkbox"/> |
| Diarrhea                           | <input type="checkbox"/> |
| Bloating (swelling, gassy feeling) | <input type="checkbox"/> |

**34. Specific symptoms of food allergy (through ingestion):****g. GUT****Wheat**

|                                    | Check box if yes         |
|------------------------------------|--------------------------|
| Stomach cramps/pain                | <input type="checkbox"/> |
| Nausea                             | <input type="checkbox"/> |
| Vomiting                           | <input type="checkbox"/> |
| Diarrhea                           | <input type="checkbox"/> |
| Bloating (swelling, gassy feeling) | <input type="checkbox"/> |

**34. Specific symptoms of food allergy (through ingestion):****g. GUT****Soy/Tofu**

|                                    | Check box if yes         |
|------------------------------------|--------------------------|
| Stomach cramps/pain                | <input type="checkbox"/> |
| Nausea                             | <input type="checkbox"/> |
| Vomiting                           | <input type="checkbox"/> |
| Diarrhea                           | <input type="checkbox"/> |
| Bloating (swelling, gassy feeling) | <input type="checkbox"/> |

**34. Specific symptoms of food allergy (through ingestion):****g. GUT****Seeds**

|                                    | Check box if yes         |
|------------------------------------|--------------------------|
| Stomach cramps/pain                | <input type="checkbox"/> |
| Nausea                             | <input type="checkbox"/> |
| Vomiting                           | <input type="checkbox"/> |
| Diarrhea                           | <input type="checkbox"/> |
| Bloating (swelling, gassy feeling) | <input type="checkbox"/> |

34g. Name of Other Food Allergy #1 \_\_\_\_\_

**34. Specific symptoms of food allergy (through ingestion):****g. GUT****Other Food Allergy #1**

|                     | Check box if yes         |
|---------------------|--------------------------|
| Stomach cramps/pain | <input type="checkbox"/> |
| Nausea              | <input type="checkbox"/> |
| Vomiting            | <input type="checkbox"/> |
| Diarrhea            | <input type="checkbox"/> |

Bloating (swelling, gassy feeling)

34g. Name of Other Food Allergy #2 \_\_\_\_\_

**34. Specific symptoms of food allergy (through ingestion):**

**g. GUT**

**Other Food Allergy #2**

|                                    | Check box if yes         |
|------------------------------------|--------------------------|
| Stomach cramps/pain                | <input type="checkbox"/> |
| Nausea                             | <input type="checkbox"/> |
| Vomiting                           | <input type="checkbox"/> |
| Diarrhea                           | <input type="checkbox"/> |
| Bloating (swelling, gassy feeling) | <input type="checkbox"/> |

34g. Name of Other Food Allergy #3 \_\_\_\_\_

**34. Specific symptoms of food allergy (through ingestion):**

**g. GUT**

**Other Food Allergy #3**

|                                    | Check box if yes         |
|------------------------------------|--------------------------|
| Stomach cramps/pain                | <input type="checkbox"/> |
| Nausea                             | <input type="checkbox"/> |
| Vomiting                           | <input type="checkbox"/> |
| Diarrhea                           | <input type="checkbox"/> |
| Bloating (swelling, gassy feeling) | <input type="checkbox"/> |

34g. Name of Other Food Allergy #4 \_\_\_\_\_

**34. Specific symptoms of food allergy (through ingestion):**

**g. GUT**

**Other Food Allergy #4**

|                                    | Check box if yes         |
|------------------------------------|--------------------------|
| Stomach cramps/pain                | <input type="checkbox"/> |
| Nausea                             | <input type="checkbox"/> |
| Vomiting                           | <input type="checkbox"/> |
| Diarrhea                           | <input type="checkbox"/> |
| Bloating (swelling, gassy feeling) | <input type="checkbox"/> |

34g. Name of Other Food Allergy #5 \_\_\_\_\_

**34. Specific symptoms of food allergy (through ingestion):****g. GUT****Other Food Allergy #5**

|                                    | Check box if yes         |
|------------------------------------|--------------------------|
| Stomach cramps/pain                | <input type="checkbox"/> |
| Nausea                             | <input type="checkbox"/> |
| Vomiting                           | <input type="checkbox"/> |
| Diarrhea                           | <input type="checkbox"/> |
| Bloating (swelling, gassy feeling) | <input type="checkbox"/> |

34g. Name of Other Food Allergy #6 \_\_\_\_\_

**34. Specific symptoms of food allergy (through ingestion):****g. GUT****Other Food Allergy #6**

|                                    | Check box if yes         |
|------------------------------------|--------------------------|
| Stomach cramps/pain                | <input type="checkbox"/> |
| Nausea                             | <input type="checkbox"/> |
| Vomiting                           | <input type="checkbox"/> |
| Diarrhea                           | <input type="checkbox"/> |
| Bloating (swelling, gassy feeling) | <input type="checkbox"/> |

**34. Specific symptoms of food allergy (through ingestion):****h. CARDIOVACULAR / Síntomas de cardiovascular****Cow's Milk/Dairy Products/Cheese**

|                                        | Check box if yes         |
|----------------------------------------|--------------------------|
| Pale or turn blue / Piel pálida o azul | <input type="checkbox"/> |
| Dizzy/Light-headed / Marceo            | <input type="checkbox"/> |
| Passing out/Fainting / Desmogo         | <input type="checkbox"/> |

**34. Specific symptoms of food allergy (through ingestion):****h. CARDIOVACULAR****Egg**

|                      | Check box if yes         |
|----------------------|--------------------------|
| Pale or turn blue    | <input type="checkbox"/> |
| Dizzy/Light-headed   | <input type="checkbox"/> |
| Passing out/Fainting | <input type="checkbox"/> |



**34. Specific symptoms of food allergy (through ingestion):****h. CARDIOVACULAR****Peanut**

|                      | Check box if yes         |
|----------------------|--------------------------|
| Pale or turn blue    | <input type="checkbox"/> |
| Dizzy/Light-headed   | <input type="checkbox"/> |
| Passing out/Fainting | <input type="checkbox"/> |

**34. Specific symptoms of food allergy (through ingestion):****h. CARDIOVACULAR****Treenut**

|                      | Check box if yes         |
|----------------------|--------------------------|
| Pale or turn blue    | <input type="checkbox"/> |
| Dizzy/Light-headed   | <input type="checkbox"/> |
| Passing out/Fainting | <input type="checkbox"/> |

**34. Specific symptoms of food allergy (through ingestion):****h. CARDIOVACULAR****Fish**

|                      | Check box if yes         |
|----------------------|--------------------------|
| Pale or turn blue    | <input type="checkbox"/> |
| Dizzy/Light-headed   | <input type="checkbox"/> |
| Passing out/Fainting | <input type="checkbox"/> |

**34. Specific symptoms of food allergy (through ingestion):****h. CARDIOVACULAR****Shellfish**

|                      | Check box if yes         |
|----------------------|--------------------------|
| Pale or turn blue    | <input type="checkbox"/> |
| Dizzy/Light-headed   | <input type="checkbox"/> |
| Passing out/Fainting | <input type="checkbox"/> |

**34. Specific symptoms of food allergy (through ingestion):****h. CARDIOVACULAR****Wheat**

|                      | Check box if yes         |
|----------------------|--------------------------|
| Pale or turn blue    | <input type="checkbox"/> |
| Dizzy/Light-headed   | <input type="checkbox"/> |
| Passing out/Fainting | <input type="checkbox"/> |

**34. Specific symptoms of food allergy (through ingestion):****h. CARDIOVACULAR****Soy/Tofu**

|                      | Check box if yes         |
|----------------------|--------------------------|
| Pale or turn blue    | <input type="checkbox"/> |
| Dizzy/Light-headed   | <input type="checkbox"/> |
| Passing out/Fainting | <input type="checkbox"/> |

**34. Specific symptoms of food allergy (through ingestion):****h. CARDIOVACULAR****Seeds**

|                      | Check box if yes         |
|----------------------|--------------------------|
| Pale or turn blue    | <input type="checkbox"/> |
| Dizzy/Light-headed   | <input type="checkbox"/> |
| Passing out/Fainting | <input type="checkbox"/> |

34h. Name of Other Food Allergy #1

---

**34. Specific symptoms of food allergy (through ingestion):****h. CARDIOVACULAR****Other Food Allergy #1**

|                      | Check box if yes         |
|----------------------|--------------------------|
| Pale or turn blue    | <input type="checkbox"/> |
| Dizzy/Light-headed   | <input type="checkbox"/> |
| Passing out/Fainting | <input type="checkbox"/> |

34h. Name of Other Food Allergy #2

---

**34. Specific symptoms of food allergy (through ingestion):****h. CARDIOVACULAR****Other Food Allergy #2**

|                      | Check box if yes         |
|----------------------|--------------------------|
| Pale or turn blue    | <input type="checkbox"/> |
| Dizzy/Light-headed   | <input type="checkbox"/> |
| Passing out/Fainting | <input type="checkbox"/> |

34h. Name of Other Food Allergy #3

---

**34. Specific symptoms of food allergy (through ingestion):****h. CARDIOVACULAR****Other Food Allergy #3**

|                      | Check box if yes         |
|----------------------|--------------------------|
| Pale or turn blue    | <input type="checkbox"/> |
| Dizzy/Light-headed   | <input type="checkbox"/> |
| Passing out/Fainting | <input type="checkbox"/> |

34h. Name of Other Food Allergy #4 \_\_\_\_\_

**34. Specific symptoms of food allergy (through ingestion):****h. CARDIOVACULAR****Other Food Allergy #4**

|                      | Check box if yes         |
|----------------------|--------------------------|
| Pale or turn blue    | <input type="checkbox"/> |
| Dizzy/Light-headed   | <input type="checkbox"/> |
| Passing out/Fainting | <input type="checkbox"/> |

34h. Name of Other Food Allergy #5 \_\_\_\_\_

**34. Specific symptoms of food allergy (through ingestion):****h. CARDIOVACULAR****Other Food Allergy #5**

|                      | Check box if yes         |
|----------------------|--------------------------|
| Pale or turn blue    | <input type="checkbox"/> |
| Dizzy/Light-headed   | <input type="checkbox"/> |
| Passing out/Fainting | <input type="checkbox"/> |

34h. Name of Other Food Allergy #6 \_\_\_\_\_

**34. Specific symptoms of food allergy (through ingestion):****h. CARDIOVACULAR****Other Food Allergy #6**

|                      | Check box if yes         |
|----------------------|--------------------------|
| Pale or turn blue    | <input type="checkbox"/> |
| Dizzy/Light-headed   | <input type="checkbox"/> |
| Passing out/Fainting | <input type="checkbox"/> |

35. Has your child ever experienced anaphylaxis (a life-threatening allergic reaction)?

Yes  
 No

¿Ha experimentado...anafilaxia? (Reacción alérgica que amenaza la vida)

**35a. If yes, to what foods? (Select all that apply)****¿A qué tipo de comida?**

|                                  | Yes                   | No                    |
|----------------------------------|-----------------------|-----------------------|
| Cow's Milk/Dairy Products/Cheese | <input type="radio"/> | <input type="radio"/> |
| Egg                              | <input type="radio"/> | <input type="radio"/> |
| Peanut                           | <input type="radio"/> | <input type="radio"/> |
| Tree Nuts                        | <input type="radio"/> | <input type="radio"/> |
| Fish                             | <input type="radio"/> | <input type="radio"/> |
| Shellfish                        | <input type="radio"/> | <input type="radio"/> |
| Wheat                            | <input type="radio"/> | <input type="radio"/> |
| Soy/Tofu                         | <input type="radio"/> | <input type="radio"/> |
| Seeds                            | <input type="radio"/> | <input type="radio"/> |
| Other Food Allergy #1            | <input type="radio"/> | <input type="radio"/> |
| Other Food Allergy #2            | <input type="radio"/> | <input type="radio"/> |
| Other Food Allergy #3            | <input type="radio"/> | <input type="radio"/> |
| Other Food Allergy #4            | <input type="radio"/> | <input type="radio"/> |
| Other Food Allergy #5            | <input type="radio"/> | <input type="radio"/> |
| Other Food Allergy #6            | <input type="radio"/> | <input type="radio"/> |

Cow's Milk/Dairy Products/Cheese  
Number of episodes (lifetime)

\_\_\_\_\_

Cow's Milk/Dairy Products/Cheese  
Number of episodes (in last year)

\_\_\_\_\_

Egg  
Number of episodes (lifetime)

\_\_\_\_\_

Egg  
Number of episodes (in last year)

\_\_\_\_\_

Peanut  
Number of episodes (lifetime)

\_\_\_\_\_

Peanut  
Number of episodes (in last year)

\_\_\_\_\_

Tree Nuts  
Number of episodes (lifetime)

\_\_\_\_\_

Tree Nuts  
Number of episodes (in last year)

\_\_\_\_\_

Fish  
Number of episodes (lifetime)

\_\_\_\_\_

Fish  
Number of episodes (in last year)

\_\_\_\_\_

---

Shellfish  
Number of episdoes (lifetime) \_\_\_\_\_

---

Shellfish  
Number of episdoes (in last year) \_\_\_\_\_

---

Wheat  
Number of episdoes (lifetime) \_\_\_\_\_

---

Wheat  
Number of episdoes (in last year) \_\_\_\_\_

---

Soy/Tofu  
Number of episodes (lifetime) \_\_\_\_\_

---

Soy/Tofu  
Number of episodes (in last year) \_\_\_\_\_

---

Seeds  
Number of episodes (lifetime) \_\_\_\_\_

---

Seeds  
Number of episodes (in last year) \_\_\_\_\_

---

Other Food Allergy #1  
\_\_\_\_\_

---

Other Food Allergy #1  
Number of episodes (lifetime) \_\_\_\_\_

---

Other Food Allergy #1  
Number of episodes (in last year) \_\_\_\_\_

---

Other Food Allergy #2  
\_\_\_\_\_

---

Other Food Allergy #2  
Number of episodes (lifetime) \_\_\_\_\_

---

Other Food Allergy #2  
Number of episodes (in last year) \_\_\_\_\_

---

Other Food Allergy #3  
\_\_\_\_\_

---

Other Food Allergy #3  
Number of episodes (lifetime) \_\_\_\_\_

---

Other Food Allergy #3  
Number of episodes (in last year) \_\_\_\_\_

---

Other Food Allergy #4  
\_\_\_\_\_

Other Food Allergy #4  
Number of episodes (lifetime) \_\_\_\_\_

Other Food Allergy #4  
Number of episodes (in last year) \_\_\_\_\_

Other Food Allergy #5  
\_\_\_\_\_

Other Food Allergy #5  
Number of episodes (lifetime) \_\_\_\_\_

Other Food Allergy #5  
Number of episodes (in last year) \_\_\_\_\_

Other Food Allergy #6  
\_\_\_\_\_

Other Food Allergy #6  
Number of episodes (lifetime) \_\_\_\_\_

Other Food Allergy #6  
Number of episodes (in last year) \_\_\_\_\_

### 36. How long does it usually take from eating the food to the onset of the allergic symptoms?

#### ¿Después de comer la comida, cuánto tiempo toma para los síntomas a aparecer?

36. How long does it usually take from eating the food to the onset of the allergic symptoms for COW'S MILK/DAIRY PRODUCTS/CHEESE?  
(Time until onset in DAYS)

\_\_\_\_\_ (number of days)

36. How long does it usually take from eating the food to the onset of the allergic symptoms for COW'S MILK/DAIRY PRODUCTS/CHEESE?  
(Time until onset in HOURS)

\_\_\_\_\_ (number of hours)

36. How long does it usually take from eating the food to the onset of the allergic symptoms for COW'S MILK/DAIRY PRODUCTS/CHEESE?  
(Time until onset in MINUTES)

\_\_\_\_\_ (number of minutes)

36. How long does it usually take from eating the food to the onset of the allergic symptoms for EGGS?  
(Time until onset in DAYS)

\_\_\_\_\_ (number of days)

36. How long does it usually take from eating the food to the onset of the allergic symptoms for EGGS?  
(Time until onset in HOURS)

\_\_\_\_\_ (number of hours)

36. How long does it usually take from eating the food to the onset of the allergic symptoms for EGGS?  
(Time until onset in MINUTES)

\_\_\_\_\_ (number of minutes)

---

36. How long does it usually take from eating the food to the onset of the allergic symptoms for PEANUTS?  
(Time until onset in DAYS)

\_\_\_\_\_

(number of days)

---

36. How long does it usually take from eating the food to the onset of the allergic symptoms for PEANUTS?  
(Time until onset in HOURS)

\_\_\_\_\_

(number of hours)

---

36. How long does it usually take from eating the food to the onset of the allergic symptoms for PEANUTS?  
(Time until onset in MINUTES)

\_\_\_\_\_

(number of minutes)

---

36. How long does it usually take from eating the food to the onset of the allergic symptoms for TREE NUTS?  
(Time until onset in DAYS)

\_\_\_\_\_

(number of days)

---

36. How long does it usually take from eating the food to the onset of the allergic symptoms for TREE NUTS?  
(Time until onset in HOURS)

\_\_\_\_\_

(number of hours)

---

36. How long does it usually take from eating the food to the onset of the allergic symptoms for TREE NUTS?  
(Time until onset in MINUTES)

\_\_\_\_\_

(number of minutes)

---

36. How long does it usually take from eating the food to the onset of the allergic symptoms for FISH?  
(Time until onset in DAYS)

\_\_\_\_\_

(number of days)

---

36. How long does it usually take from eating the food to the onset of the allergic symptoms for FISH?  
(Time until onset in HOURS)

\_\_\_\_\_

(number of hours)

---

36. How long does it usually take from eating the food to the onset of the allergic symptoms for FISH?  
(Time until onset in MINUTES)

\_\_\_\_\_

(number of minutes)

---

36. How long does it usually take from eating the food to the onset of the allergic symptoms for SHELLFISH?  
(Time until onset in DAYS)

\_\_\_\_\_

(number of days)

---

36. How long does it usually take from eating the food to the onset of the allergic symptoms for SHELLFISH?  
(Time until onset in HOURS)

\_\_\_\_\_

(number of hours)

---

36. How long does it usually take from eating the food to the onset of the allergic symptoms for SHELLFISH?  
(Time until onset in MINUTES)

\_\_\_\_\_

(number of minutes)

---

36. How long does it usually take from eating the food to the onset of the allergic symptoms for WHEAT?  
(Time until onset in DAYS)

\_\_\_\_\_

(number of days)

---

36. How long does it usually take from eating the food to the onset of the allergic symptoms for WHEAT?  
(Time until onset in HOURS)

\_\_\_\_\_

(number of hours)

---

---

36. How long does it usually take from eating the food to the onset of the allergic symptoms for WHEAT?  
(Time until onset in MINUTES)

\_\_\_\_\_

(number of minutes)

---

36. How long does it usually take from eating the food to the onset of the allergic symptoms for SOY/TOFU?  
(Time until onset in DAYS)

\_\_\_\_\_

(number of days)

---

36. How long does it usually take from eating the food to the onset of the allergic symptoms for SOY/TOFU?  
(Time until onset in HOURS)

\_\_\_\_\_

(number of hours)

---

36. How long does it usually take from eating the food to the onset of the allergic symptoms for SOY/TOFU?  
(Time until onset in MINUTES)

\_\_\_\_\_

(number of minutes)

---

36. How long does it usually take from eating the food to the onset of the allergic symptoms for SEEDS?  
(Time until onset in DAYS)

\_\_\_\_\_

(number of days)

---

36. How long does it usually take from eating the food to the onset of the allergic symptoms for SEEDS?  
(Time until onset in HOURS)

\_\_\_\_\_

(number of hours)

---

36. How long does it usually take from eating the food to the onset of the allergic symptoms for SEEDS?  
(Time until onset in MINUTES)

\_\_\_\_\_

(number of minutes)

---

36. Name of Other Food Allergy #1

\_\_\_\_\_

---

36. How long does it usually take from eating the food to the onset of the allergic symptoms for OTHER FOOD ALLERGY #1?  
(Time until onset in DAYS)

\_\_\_\_\_

(number of days)

---

36. How long does it usually take from eating the food to the onset of the allergic symptoms for OTHER FOOD ALLERGY #1?  
(Time until onset in HOURS)

\_\_\_\_\_

(number of hours)

---

36. How long does it usually take from eating the food to the onset of the allergic symptoms for OTHER FOOD ALLERGY #1?  
(Time until onset in MINUTES)

\_\_\_\_\_

(number of minutes)

---

36. Name of Other Food Allergy #2

\_\_\_\_\_

---

36. How long does it usually take from eating the food to the onset of the allergic symptoms for OTHER FOOD ALLERGY #2?  
(Time until onset in DAYS)

\_\_\_\_\_

(number of days)

---



---

36. How long does it usually take from eating the food to the onset of the allergic symptoms for OTHER FOOD ALLERGY #2?  
(Time until onset in HOURS)

\_\_\_\_\_

(number of hours)

---

36. How long does it usually take from eating the food to the onset of the allergic symptoms for OTHER FOOD ALLERGY #2?  
(Time until onset in MINUTES)

\_\_\_\_\_

(number of minutes)

---

36. Name of Other Food Allergy #3

\_\_\_\_\_

---

36. How long does it usually take from eating the food to the onset of the allergic symptoms for OTHER FOOD ALLERGY #3?  
(Time until onset in DAYS)

\_\_\_\_\_

(number of days)

---

36. How long does it usually take from eating the food to the onset of the allergic symptoms for OTHER FOOD ALLERGY #3?  
(Time until onset in HOURS)

\_\_\_\_\_

(number of hours)

---

36. How long does it usually take from eating the food to the onset of the allergic symptoms for OTHER FOOD ALLERGY #3?  
(Time until onset in MINUTES)

\_\_\_\_\_

(number of minutes)

---

36. Name of Other Food Allergy #4

\_\_\_\_\_

---

36. How long does it usually take from eating the food to the onset of the allergic symptoms for OTHER FOOD ALLERGY #4?  
(Time until onset in DAYS)

\_\_\_\_\_

(number of days)

---

36. How long does it usually take from eating the food to the onset of the allergic symptoms for OTHER FOOD ALLERGY #4?  
(Time until onset in HOURS)

\_\_\_\_\_

(number of hours)

---

36. How long does it usually take from eating the food to the onset of the allergic symptoms for OTHER FOOD ALLERGY #4?  
(Time until onset in MINUTES)

\_\_\_\_\_

(number of minutes)

---

36. Name of Other Food Allergy #5

\_\_\_\_\_

---

36. How long does it usually take from eating the food to the onset of the allergic symptoms for OTHER FOOD ALLERGY #5?  
(Time until onset in DAYS)

\_\_\_\_\_

(number of days)

---

36. How long does it usually take from eating the food to the onset of the allergic symptoms for OTHER FOOD ALLERGY #5?  
(Time until onset in HOURS)

\_\_\_\_\_

(number of hours)

36. How long does it usually take from eating the food to the onset of the allergic symptoms for OTHER FOOD ALLERGY #5? \_\_\_\_\_  
 (Time until onset in MINUTES) (number of minutes)

36. Name of Other Food Allergy #6 \_\_\_\_\_

36. How long does it usually take from eating the food to the onset of the allergic symptoms for OTHER FOOD ALLERGY #6? \_\_\_\_\_  
 (Time until onset in DAYS) (number of days)

36. How long does it usually take from eating the food to the onset of the allergic symptoms for OTHER FOOD ALLERGY #6? \_\_\_\_\_  
 (Time until onset in HOURS) (number of hours)

36. How long does it usually take from eating the food to the onset of the allergic symptoms for OTHER FOOD ALLERGY #6? \_\_\_\_\_  
 (Time until onset in MINUTES) (number of minutes)

**37. What treatment(s) has/have your child used for the most severe COW's MILK/DAIRY PRODUCTS/CHEESE allergic reactions? (Select all that apply)**  
**¿Qué tipo de tratamiento se ha utilizado... para tratar las reacciones alérgicas?**

- |                                      | Check box if yes         |
|--------------------------------------|--------------------------|
| Benadryl Only / Solamente Benadryl   | <input type="checkbox"/> |
| Epi Pen / EpiPen                     | <input type="checkbox"/> |
| Doctor's Office / Oficina del doctor | <input type="checkbox"/> |
| ER / Sala de emergencia              | <input type="checkbox"/> |
| Hospital / Hospital                  | <input type="checkbox"/> |
| ICU / UCI                            | <input type="checkbox"/> |

**37. What treatment(s) has/have your child used for the most severe EGG allergic reactions? (Select all that apply)**

- |                 | Check box if yes         |
|-----------------|--------------------------|
| Benadryl Only   | <input type="checkbox"/> |
| Epi Pen         | <input type="checkbox"/> |
| Doctor's Office | <input type="checkbox"/> |
| ER              | <input type="checkbox"/> |
| Hospital        | <input type="checkbox"/> |
| ICU             | <input type="checkbox"/> |

**37. What treatment(s) has/have your child used for the most severe PEANUT allergic reactions? (Select all that apply)**

|                 | Check box if yes         |
|-----------------|--------------------------|
| Benadryl Only   | <input type="checkbox"/> |
| Epi Pen         | <input type="checkbox"/> |
| Doctor's Office | <input type="checkbox"/> |
| ER              | <input type="checkbox"/> |
| Hospital        | <input type="checkbox"/> |
| ICU             | <input type="checkbox"/> |

**37. What treatment(s) has/have your child used for the most severe TREE NUTS allergic reactions? (Select all that apply)**

|                 | Check box if yes         |
|-----------------|--------------------------|
| Benadryl Only   | <input type="checkbox"/> |
| Epi Pen         | <input type="checkbox"/> |
| Doctor's Office | <input type="checkbox"/> |
| ER              | <input type="checkbox"/> |
| Hospital        | <input type="checkbox"/> |
| ICU             | <input type="checkbox"/> |

**37. What treatment(s) has/have your child used for the most severe FISH allergic reactions? (Select all that apply)**

|                 | Check box if yes         |
|-----------------|--------------------------|
| Benadryl Only   | <input type="checkbox"/> |
| Epi Pen         | <input type="checkbox"/> |
| Doctor's Office | <input type="checkbox"/> |
| ER              | <input type="checkbox"/> |
| Hospital        | <input type="checkbox"/> |
| ICU             | <input type="checkbox"/> |

**37. What treatment(s) has/have your child used for the most severe SHELLFISH allergic reactions? (Select all that apply)**

|                 | Check box if yes         |
|-----------------|--------------------------|
| Benadryl Only   | <input type="checkbox"/> |
| Epi Pen         | <input type="checkbox"/> |
| Doctor's Office | <input type="checkbox"/> |
| ER              | <input type="checkbox"/> |
| Hospital        | <input type="checkbox"/> |
| ICU             | <input type="checkbox"/> |

**37. What treatment(s) has/have your child used for the most severe WHEAT allergic reactions? (Select all that apply)**

|                 | Check box if yes         |
|-----------------|--------------------------|
| Benadryl Only   | <input type="checkbox"/> |
| Epi Pen         | <input type="checkbox"/> |
| Doctor's Office | <input type="checkbox"/> |
| ER              | <input type="checkbox"/> |
| Hospital        | <input type="checkbox"/> |
| ICU             | <input type="checkbox"/> |

**37. What treatment(s) has/have your child used for the most severe SOY/TOFU allergic reactions? (Select all that apply)**

|                 | Check box if yes         |
|-----------------|--------------------------|
| Benadryl Only   | <input type="checkbox"/> |
| Epi Pen         | <input type="checkbox"/> |
| Doctor's Office | <input type="checkbox"/> |
| ER              | <input type="checkbox"/> |
| Hospital        | <input type="checkbox"/> |
| ICU             | <input type="checkbox"/> |

**37. What treatment(s) has/have your child used for the most severe SEEDS allergic reactions? (Select all that apply)**

|                 | Check box if yes         |
|-----------------|--------------------------|
| Benadryl Only   | <input type="checkbox"/> |
| Epi Pen         | <input type="checkbox"/> |
| Doctor's Office | <input type="checkbox"/> |
| ER              | <input type="checkbox"/> |
| Hospital        | <input type="checkbox"/> |
| ICU             | <input type="checkbox"/> |

37. Name of Other Food Allergy #1 \_\_\_\_\_

**37. What treatment(s) has/have your child used for the most severe OTHER FOOD ALLERGY #1 allergic reactions? (Select all that apply)**

|                 | Check box if yes         |
|-----------------|--------------------------|
| Benadryl Only   | <input type="checkbox"/> |
| Epi Pen         | <input type="checkbox"/> |
| Doctor's Office | <input type="checkbox"/> |
| ER              | <input type="checkbox"/> |
| Hospital        | <input type="checkbox"/> |

ICU

37. Name of Other Food Allergy #2 \_\_\_\_\_

**37. What treatment(s) has/have your child used for the most severe OTHER FOOD ALLERGY #2 allergic reactions? (Select all that apply)**

|                 | Check box if yes         |
|-----------------|--------------------------|
| Benadryl Only   | <input type="checkbox"/> |
| Epi Pen         | <input type="checkbox"/> |
| Doctor's Office | <input type="checkbox"/> |
| ER              | <input type="checkbox"/> |
| Hospital        | <input type="checkbox"/> |
| ICU             | <input type="checkbox"/> |

37. Name of Other Food Allergy #3 \_\_\_\_\_

**37. What treatment(s) has/have your child used for the most severe OTHER FOOD ALLERGY #3 allergic reactions? (Select all that apply)**

|                 | Check box if yes         |
|-----------------|--------------------------|
| Benadryl Only   | <input type="checkbox"/> |
| Epi Pen         | <input type="checkbox"/> |
| Doctor's Office | <input type="checkbox"/> |
| ER              | <input type="checkbox"/> |
| Hospital        | <input type="checkbox"/> |
| ICU             | <input type="checkbox"/> |

37. Name of Other Food Allergy #4 \_\_\_\_\_

**37. What treatment(s) has/have your child used for the most severe OTHER FOOD ALLERGY #4 allergic reactions? (Select all that apply)**

|                 | Check box if yes         |
|-----------------|--------------------------|
| Benadryl Only   | <input type="checkbox"/> |
| Epi Pen         | <input type="checkbox"/> |
| Doctor's Office | <input type="checkbox"/> |
| ER              | <input type="checkbox"/> |
| Hospital        | <input type="checkbox"/> |
| ICU             | <input type="checkbox"/> |

37. Name of Other Food Allergy #5 \_\_\_\_\_

**37. What treatment(s) has/have your child used for the most severe OTHER FOOD ALLERGY #5 allergic reactions? (Select all that apply)**

|                 | Check box if yes         |
|-----------------|--------------------------|
| Benadryl Only   | <input type="checkbox"/> |
| Epi Pen         | <input type="checkbox"/> |
| Doctor's Office | <input type="checkbox"/> |
| ER              | <input type="checkbox"/> |
| Hospital        | <input type="checkbox"/> |
| ICU             | <input type="checkbox"/> |

37. Name of Other Food Allergy #6 \_\_\_\_\_

**37. What treatment(s) has/have your child used for the most severe OTHER FOOD ALLERGY #6 allergic reactions? (Select all that apply)**

|                 | Check box if yes         |
|-----------------|--------------------------|
| Benadryl Only   | <input type="checkbox"/> |
| Epi Pen         | <input type="checkbox"/> |
| Doctor's Office | <input type="checkbox"/> |
| ER              | <input type="checkbox"/> |
| Hospital        | <input type="checkbox"/> |
| ICU             | <input type="checkbox"/> |

**Section II. Family History**

38. What is your present marital status?

¿Mamá, Ud. Está?  
Casada  
Viuda  
Divorciada  
Separada  
Soltera

- Married  
 Widowed  
 Divorced  
 Separated  
 Single

39. What is the highest grade of school you have completed to date?

¿Qué grado de escuela Ud. terminó?

- No school  
 Elementary school  
 Some secondary school (9th grade and above)  
 High school graduate or GED  
 Some college  
 College degree  
 Graduate school degree  
 Post Graduate (PhD/MD/Other)

40. Are you currently working for pay?

¿Ud. Está trabajando?

- Yes  
 No

41. What is your occupation/job title?

¿Cuál es su ocupación? \_\_\_\_\_

---

What field does your occupation fall under?

- Not Applicable  
 Management/Business/Administration  
 Financial/Computer/Mathematical  
 Architecture and Engineering  
 Life, Physical, and Social Science  
 Legal Occupations  
 Education, Training, and Library  
 Sales, Arts, Design, Entertainment, and Media  
 Athletics (Sports, Dancing, etc)  
 Healthcare  
 Food Preparation and Serving  
 Building and Grounds Cleaning and Maintenance  
 Personal Care and Service  
 Farming, Fishing, and Forestry  
 Construction Trades  
 Extraction Workers  
 Installation, Maintenance, and Repair Workers  
 Production Occupations  
 Transportation and Material Moving  
 Military Specific

---

42. What was your total household income last year, before taxes? (INCLUDES PUBLIC ASSISTANCE)

¿Por el último año, ¿Cuántos fueron su ingresos totales de hogar?

- < \$5,000  
 \$5,000-9,999  
 \$10,000-14,999  
 \$15,000-19,999  
 \$20,000-24,999  
 \$25,000-29,999  
 \$30,000-34,999  
 \$35,000-39,999  
 \$40,000-49,999  
 \$50,000-59,999  
 \$60,000-79,999  
 \$80,000-99,999  
 > \$100,000  
 Unsure

---

43. What is your current height in FEET?

¿Qué es su altura actual?

---



---

43. What is your current height in INCHES?

¿Qué es su altura actual?  
Pulgadas

---



---

43. What is your current height in CENTIMETERS?

¿Qué es su altura actual?  
Centímetros

---



---

44. What is your current weight (IN POUNDS)?

¿Su peso actual?

---

(pounds)

---

44. What is your current weight (IN KILOGRAMS)?

---

(kilograms)

45a. Can I ask what your child's biological father's height and weight is?

- Yes  
 No

¿Puedo preguntar sobre el padre?

45b. What is the baby's father's current height (IN FEET)?

\_\_\_\_\_ (feet)

¿Altura de padre de...?

45b. What is the baby's father's current height (IN INCHES)?

\_\_\_\_\_ (inches)

¿Altura de padre de...?

45b. What is the baby's father's current height (IN CENTIMETERS)?

\_\_\_\_\_ (centimeters)

¿Altura de padre de...?

45b. Check box if mother is unsure of baby's father's current height

- Unsure

46. What is the baby's father's current weight (IN POUNDS)?

\_\_\_\_\_ (pounds)

¿Peso de padre de...?

46. What is the baby's father's current weight (IN KILOGRAMS)?

\_\_\_\_\_ (kilograms)

¿Peso de padre de...?

46. Check box if mother is unsure of baby's father's current weight

- Unsure

47. Do you have a personal history of asthma?

- No  
 Yes I have it now  
 Yes, only when I was a child, but I outgrew it  
 Unsure

¿Ud. Tenido asma?

If asthma outgrown, at what age? (YEARS)

\_\_\_\_\_ (age in years when mother outgrew asthma)

If asthma outgrown, at what age? (MONTHS)

\_\_\_\_\_ (age in months when mother outgrew asthma)

If YES, was your asthma diagnosed by a doctor?

- Yes  
 No  
 Unsure

¿Fue diagnosticado por un doctor?

How old were you when your asthma was first diagnosed by a doctor?

- Yes, I remember  
 Unsure

¿Cuándo?



How old were you when your asthma was first diagnosed by a doctor? (AGE IN YEARS)

\_\_\_\_\_ (years)

How old were you when your asthma was first diagnosed by a doctor? (AGE IN MONTHS)

\_\_\_\_\_ (months)

48. Have you ever used an inhaler or a nebulizer?

¿Ha usado Ud. un inhalador?

- Yes  
 No  
 Unsure

49. Do you have Eczema?

¿Ha tenido Ud. Eccema?

- Yes, I have it now  
 Yes, only when I was a child, but I outgrew it  
 No  
 Unsure

If yes, only when I was a baby, but outgrew by:  
Years

\_\_\_\_\_ (Years)

If yes, only when I was a baby, but outgrew by:  
Months

\_\_\_\_\_ (Months)

If YES, was your eczema diagnosed by a doctor?

¿Fue diagnosticado por un doctor?

- Yes  
 No  
 Unsure

How old were you when your eczema was first diagnosed by a doctor?

¿Cuándo?

- Yes, I remember  
 Unsure

How old were you when your eczema was first diagnosed by a doctor? (AGE IN YEARS)

\_\_\_\_\_ (years)

How old were you when your eczema was first diagnosed by a doctor? (AGE IN MONTHS)

\_\_\_\_\_ (months)

50. Have you ever used a steroid cream (like hydrocortisone cream or triamcinolone cream), including creams, lotions, and ointments containing steroids?

¿Ha usado ud. alguna crema que contiene esteroides (como hidrocortisona)?

- Yes  
 No  
 Unsure

51. Do you have hay fever or seasonal allergies?

¿Tiene Ud. alergias estacionales?

- Yes, I have it now  
 Yes, only when I was a child, but I outgrew it  
 No  
 Unsure

How old were you when you outgrew your hay fever or seasonal allergies?

Years

\_\_\_\_\_ (Years)

How old were you when you outgrew your hay fever or seasonal allergies?

Months

\_\_\_\_\_ (Months)

If YES, was your hay fever diagnosed by a doctor?

¿Fue diagnosticado por un doctor?

- Yes  
 No  
 Unsure

How old were you when your hay fever was first diagnosed by a doctor?

¿Cuándo?

- Yes, I remember  
 Unsure

How old were you when your hay fever was first diagnosed by a doctor? (AGE IN YEARS)

\_\_\_\_\_ (years)

How old were you when your hay fever was first diagnosed by a doctor? (AGE IN MONTHS)

\_\_\_\_\_ (months)

Which season(s) do you have seasonal allergies? (select all that apply)

Primavera  
 Verano  
 Otoño  
 Invierno  
 Todo el año

- Spring  
 Summer  
 Autumn  
 Winter  
 Year round  
 Unsure

52. Do you have drug allergies?

¿Tiene Ud. alergias a algunas medicinas?

- Yes  
 No  
 Unsure

If YES, specify the drug(s)

\_\_\_\_\_ (use "," to separate)

If YES, was your drug allergy diagnosed by a doctor?

¿Fue diagnosticado por un doctor?

- Yes  
 No

How old were you when your drug allergy was first diagnosed by a doctor?

¿Cuándo?

- Yes, I remember  
 Unsure

How old were you (AGE IN YEARS) when first diagnosed by a doctor with a drug allergy?

\_\_\_\_\_ (years)

How old were you (AGE IN MONTHS) when first diagnosed by a doctor with a drug allergy?

\_\_\_\_\_ (months)

53. Have you ever used anti-allergy medications? (ie Benadryl, Zyrtec, Claritin, Atarax, Dimetapp)  Yes  
 No  
 Unsure

¿Ha usado Ud. Medicina anti-alergia?

54. Do you have any allergies triggered by the environment that was diagnosed by your doctor?  Yes  
 No  
 Unsure

¿Tiene Ud. otras alergias diagnosticadas por un doctor?

If YES, what type? (select all that apply)

Gato  Cat  
 Pero  Cockroach  
 Cucaracha  Dog  
 Moho  Dust Mite  
 Polen  Mold  
 Polvo  Pollen  
 Other  
 Unsure

If OTHER, specify \_\_\_\_\_

55. Are you allergic to insect stings?  Yes  
 No  
 Don't know/Never been stung

¿Ha sido Ud. picado por un abeja o avispa/ avispon?  
 ¿Tuvo Ud. una reacción alérgica a la picadura?

If YES, 1) What type of insect?  Bee  
 Wasp  
 Yellow Jacket

¿Qué tipo?

If YES, 2) Is it a severe allergy (that is, difficulty breathing, need epi pen or to go to the hospital)?  Yes  
 No  
 Unsure

¿Es una alergia muy grave?

56. Do you have food allergies?  Yes, I have it now  
 Yes, only when I was a child, but outgrew  
 Unsure  
 No

¿Tiene Ud. alergias alimentales?

If OUTGREW, by what age (IN YEARS)? \_\_\_\_\_

If OUTGREW, by what age (IN MONTHS)? \_\_\_\_\_

If YES, was your food allergy diagnosed by a doctor?  Yes  
 No  
 Unsure

¿Fue diagnosticado por un doctor?

How old were you when first diagnosed by a doctor?  Yes, I remember  
 Unsure

¿Cuándo?

How old were you (AGE IN YEARS) when first diagnosed by a doctor? \_\_\_\_\_

(years)

How old were you (AGE IN MONTHS) when first diagnosed by a doctor?

\_\_\_\_\_ (months)

### 57. If you ever had a food allergy, what type of food(s) were you allergic to?

#### ¿A qué tipo de comida tiene Ud. alergias?

|                                  | Yes                   | No                    |
|----------------------------------|-----------------------|-----------------------|
| Cow's milk/dairy products/cheese | <input type="radio"/> | <input type="radio"/> |
| Egg Whites                       | <input type="radio"/> | <input type="radio"/> |
| Peanut                           | <input type="radio"/> | <input type="radio"/> |
| Tree Nuts                        | <input type="radio"/> | <input type="radio"/> |
| Fish                             | <input type="radio"/> | <input type="radio"/> |
| Shellfish                        | <input type="radio"/> | <input type="radio"/> |
| Wheat                            | <input type="radio"/> | <input type="radio"/> |
| Soy/Tofu                         | <input type="radio"/> | <input type="radio"/> |
| Seeds                            | <input type="radio"/> | <input type="radio"/> |
| Other Foods                      | <input type="radio"/> | <input type="radio"/> |

If you have ever had an allergy to TREE NUTS, please choose the specific type (select all that apply)

¿Qué tipo de nueces?

- Almond
- Cashew
- Filbert/Hazel
- Walnut
- Brazil
- Macadamia
- Pecan
- Pine
- Pistachio
- Other

If other tree nuts, specify: \_\_\_\_\_

If you have ever had an allergy to FISH, please choose the specific type (select all that apply)

¿Qué tipo de pescado?

- Salmon
- Tuna
- Catfish
- Cod
- Flounder
- Halibut
- Trout
- Bass
- Other

If other fish, specify: \_\_\_\_\_

If you have ever had an allergy to SHELLFISH, please choose the specific type (select all that apply)

¿Qué tipo de mariscos?

- Shrimp
- Crab
- Lobster
- Clam
- Oyster
- Mussels
- Other

If other shellfish, specify:

\_\_\_\_\_

If you have ever had an allergy to SEEDS, please choose the specific type (select all that apply)

- Sesame  
 Sunflower  
 Pumpkin  
 Other

¿Qué tipo de semillas?

If other seeds, specify:

\_\_\_\_\_

If other foods not listed, specify:

\_\_\_\_\_

### Section III. Home Environment

#### 58. Here are some questions about your current home:

#### Estas preguntas son sobre su hogar actual

a) How long have you lived in your current home?  
(TIME IN YEARS)

\_\_\_\_\_

¿Cuántos años ha vivido Ud. en su Casa?

a) How long have you lived in your current home?  
(TIME IN MONTHS)

\_\_\_\_\_

¿Cuántos años ha vivido Ud. en su Casa?

b) What type of housing is your home?

- Single family  
 Duplex  
 Row House  
 Condo/Apartment  
 Trailer Home  
 Shelter  
 Other

¿Qué tipo de casa? ¿Casa o apartamento?

If Others, specify:

\_\_\_\_\_

c) # of bedrooms

\_\_\_\_\_

¿Cuántas habitaciones tiene en la casa?

d) # of bathrooms

\_\_\_\_\_

¿Cuántos baños?

e) # of people who permanently live in your home

\_\_\_\_\_

¿Cuántas personas viven allí?

f) What type of fuel do you use for heating your home?

- Gas  
 Electricity  
 Oil  
 Other  
 Unsure

¿Qué usa Ud. para calentar la casa?

Aceite  
 Electricidad  
 Gas

If Others, specify:

\_\_\_\_\_  
(other type of fuel used for heating the home)

g) What type of stove do you use for cooking?

- Gas  
 Electricity  
 Other  
 Unsure

¿Y para cocinar?

Gas  
 Electricidad

If Others, specify:

\_\_\_\_\_  
(other type of fuel used for cooking)

h) Do you have any wall to wall carpet in your home?

- Yes  
 No  
 Unsure

¿Hay alfombra de pared a pared en alguna parte de la casa?

If yes, specify location:

Sala  
 Sala de estar  
 Comendar  
 Cocina  
 Habitaciones  
 Sótano  
 Baño

- Living room  
 Family room  
 Dining room  
 Kitchen  
 Bedroom (master) parents  
 Bedroom index child  
 Bedroom Sib#1  
 Bedroom Sib#2  
 Basement  
 Bathroom

i) Approximately how old is the building/apartment/home you live in?

- 10 years or less  
 11-25 years  
 26-50 years  
 51-75 years  
 Greater than 75 years old  
 Don't know

¿Cuántos años tiene desde su casa ha sido consumado?

59. Have you (mother of the child) ever smoked cigarettes, cigars, or pipes?

- No, I never smoked  
 Yes, I currently smoke  
 I used to smoke but I quit before becoming pregnant with index child  
 I used to smoke but quit after becoming pregnant with index child

¿Ud. fuma? (¿Ha fumado?)

Nunca  
 ¿Ha dejado fumar?  
 ¿Cuándo dejó, antes o después de queda embarazada con...?

If yes, what do/did you smoke?

- Cigarettes  
 Cigars  
 Pipes

Cigarrillos  
 Cigarros  
 Pipa

60. If yes to Q 59,  
Do you smoke inside the home?  Yes  
 No

¿Fuma en la casa?

How many (cigarettes, cigars, pipes) do you smoke PER  
DAY (Regardless of indoor or outdoor) \_\_\_\_\_

¿Cuántos cigarrillos fuman por día?

OR, How many (cigarettes, cigars, pipes) do you smoke  
PER WEEK (Regardless of indoor or outdoor) \_\_\_\_\_

¿Cuántos cigarrillos fuman por semana?

61. Can I ask you about your child's biological  
father's smoking status?  Yes  
 No

¿Puedo preguntar sobre el padre?

61a. Has the father of the child ever smoked  
cigarettes, cigars, or pipes?

¿Y el padre de ... ha fumado?

- No, he never smoked  
 Yes, he currently smokes  
 He used to smoke but he quit before I became  
pregnant with index child  
 He used to smoke but he quit after I became  
pregnant with index child

If yes, what does/did he smoke?

Cigarrillos  
Cigarros  
Pipa

- Cigarettes  
 Cigars  
 Pipes

62. If yes to Q 61,  
Does he smoke inside the home?  Yes  
 No

¿Fuma él en la casa?

How many (cigarettes, cigars, pipes) does he smoke PER  
DAY (Regardless of indoor or outdoor)? \_\_\_\_\_

(per day)

¿Cuántos cigarrillos fuman por día?

OR, How many (cigarettes, cigars, pipes) does he smoke  
PER WEEK (Regardless of indoor or outdoor)? \_\_\_\_\_

(per week)

¿Cuántos cigarrillos fuman por semana?

63. How many other people who live in your home smoke  
cigarettes (not including the mother and father of the  
child)? \_\_\_\_\_

¿Hay otras personas en la casa que fuman?

64. How many of them smoke inside the home? \_\_\_\_\_

¿Cuántas personas fuman en la casa?

65. Total numbers of cigarettes smoked inside your home per day (NOT INCLUDING AMOUNT SMOKED by yourself and the father of your child)? \_\_\_\_\_

66. Do you currently have any pets in your home?

- Yes  
 No

¿Tiene Ud. mascotas o animales en la casa?

**If yes, specify type of pet and how many of each type:**

|                                  | Yes                   | No                    |
|----------------------------------|-----------------------|-----------------------|
| Cat / Gato                       | <input type="radio"/> | <input type="radio"/> |
| Dog / Pero                       | <input type="radio"/> | <input type="radio"/> |
| Reptiles / Reptiles              | <input type="radio"/> | <input type="radio"/> |
| Rabbit / Conejo                  | <input type="radio"/> | <input type="radio"/> |
| Fish / Pez                       | <input type="radio"/> | <input type="radio"/> |
| Guinea Pig / conejillo de indias | <input type="radio"/> | <input type="radio"/> |
| Birds / Pájaro                   | <input type="radio"/> | <input type="radio"/> |
| Others                           | <input type="radio"/> | <input type="radio"/> |

How many cats?

\_\_\_\_\_

How many dogs?

\_\_\_\_\_

How many reptiles?

\_\_\_\_\_

How many rabbits?

\_\_\_\_\_

How many fish?

\_\_\_\_\_

How many guinea pigs?

\_\_\_\_\_

How many birds?

\_\_\_\_\_

If others, specify:

\_\_\_\_\_

How many others?

\_\_\_\_\_

67. Does the house you live in have any cockroaches?

- Yes  
 No  
 Unsure

¿Hay cucarachas en la casa?



---

68. Does the house you live in have any mice/rats?  Yes  
 No  
¿Hay ratones o ratas en las casa?  Unsure

---

69. Does the house you live in have any visible mold, mildew, water damage, leakage or seepage?  Yes  
 No  
¿Hay moho o daños por agua en la casa?  Unsure

---

70. Do you currently live in a farming environment?  Yes  
 No  
¿Ud. no vive en una granja, verdad?  Unsure
