# Supplementary material for: Boston Birth Cohort profile: rationale and study design
Source: PubMed Central journal article supplement (PMC9844822; doi:10.1097/pn9.0000000000000011), 2022-08-18
Supplement: NIHMS1818381-supplement-_6.pdf [file NIHMS1818381-supplement-_6.pdf]

# Covid19 School Housing And Telemedicine Questionnaire

Thank you for participating in the BMC Children's Health Study. This questionnaire is about you and your family's experiences during the Coronavirus (Covid19) Pandemic beginning in March of 2020. You may have answered a questionnaire about Covid Health and Resources earlier in the year, but this is a new questionnaire to ask about additional hardships since the Covid 19 pandemic has continued to impact communities.

These questions ask about access to healthcare, school, housing, physical activity and other resources and hardships. Most research studies cannot be in-person at BMC yet so we are asking our participants to complete our questionnaires using a secure system called REDCap. The survey will take about 10-15 minutes to complete. The Visit ID and Interviewer sections will be filled in for you, so please just fill in the date you are answering the questionnaire and the remainder of the questions. Once you have answered all the questions, please press submit.

Visit ID \_\_\_\_\_

Response method

- Self administered by participant  
 Administered over the phone  
 Done in person

This questionnaire asks about some of the ways the Coronavirus (Covid 19) pandemic has affected our daily lives including school, housing, healthcare, and access to food. Please answer the questions based on the events since the beginning of the Coronavirus (Covid 19) pandemic in March 2020. If you have any questions or prefer to answer the survey over the phone please contact Gabie Mirolli at [gabrielle.mirolli@bmc.org](mailto:gabrielle.mirolli@bmc.org) or (857) 505-4471. If you need help with resources because of hardships you or your family may be experiencing during COVID-19, please visit: BMC Community Resource Guide Este cuestionario pregunta sobre algunas de las maneras en que la pandemia del coronavirus (Covid 19) ha afectado nuestra vida diaria, incluso la escuela, la vivienda, la atención médica y el acceso a la comida. Por favor contesta las preguntas sobre los eventos desde el principio de la pandemia del coronavirus (Covid 19) en marzo de 2020. Si tiene alguna pregunta o prefiere responder al cuestionario por teléfono, por favor contacte con Gabie Mirolli en [gabrielle.mirolli@bmc.org](mailto:gabrielle.mirolli@bmc.org) o (857) 505-4471. Si usted o su familia necesita ayuda con dificultades durante la pandemia por favor hace clic aquí: BMC Community Resource Guide

**This section of the survey is about the changes to schooling that have occurred because of the Covid 19 Pandemic. If you do not have any children or your children are not in grades K-12 please select "none" for the first question in this section.**

**Esta sección del cuestionario es sobre los cambios a la enseñanza causada por la pandemia de Covid 19. Si no tiene hijos o sus hijos no están en los grados K-12 por favor elegir "none (0)" para la primera pregunta en esta sección.**

How many children in grades K-12 do you have?

Cuantos de sus hijos están en los grados K-12?

- One (1)  
 Two (2)  
 Three (3)  
 Four (4)  
 Five (5)  
 Six (6)  
 Seven (7)  
 None (0)  
 Prefer not to answer (Prefiero no responder)

What type of schooling are your child(ren) currently receiving? (Check all that apply)

- Hybrid (part time remote part time in person)  
 Remote learning full time  
 In person full time

¿Qué tipo de aprendizaje reciben sus hijos actualmente? (marque todos que apliquen)

1. Híbrido (mezcla de remoto y en persona)
2. Remoto a tiempo completo
3. En persona a tiempo completo

If your child(ren) is/are on the hybrid model, how often are they going into school?

- Every other week     Every other day  
 2 days a week     Other

Si sus hijos usan el modelo híbrido, ¿con qué frecuencia van a la escuela?

1. Cada dos semanas
2. Cada dos días
3. Dos días a la semana
4. Otro

If other, please describe how often your child goes into school

\_\_\_\_\_

Si es otro, con qué frecuencia van a la escuela

If your child(ren) is/are engaging in remote learning, is there an adult who is able to be at home with them while they are in school?

- Yes  
 No

Si sus hijos están participando en el aprendizaje remoto, ¿hay un adulto en casa cuando están en clase?

1. Sí
2. No

What types of device(s) do your children use to participate in remote learning? (Check all that apply)

- Desktop computer  
 Laptop computer or Chromebook  
 Tablet or iPad  
 Smartphone  
 Other

¿Qué tipo de aparato(s) usan sus hijos para participar en el aprendizaje remoto? (Marque todos que apliquen)

1. computadora de escritorio
2. portátil o Chromebook
3. tableta o iPad
4. teléfono inteligente
5. otro

If other, please specify what type of device is used

\_\_\_\_\_

Si es otro, ¿qué tipo de aparato usan?

---

If your child(ren) is/are engaged in remote learning do you have enough devices for them to each participate in the programming scheduled by their school(s)?

Yes  No  Prefer not to answer

Si sus hijos participan en el aprendizaje remoto, tienen suficientes aparatos para que cada hijo puede participar en las lecciones programadas por su escuela?

1. Sí
2. No
3. Prefiero no responder

---

Do any of your children have an IEP (Individualized Education Plan) and/or a 504 Plan at school?

Yes, an IEP  
 Yes, a 504 Plan  
 Yes, both  
 No  
 Prefer not to answer

¿Tiene alguno de sus hijos un programa educativo individualizado (IEP) y/o un plan 504 en escuela?

1. sí, un IEP
2. sí, un plan 504
3. sí, los dos
4. no
5. prefiero no responder

---

What grade is your first child in?

¿En qué grado está su primer hijo/a?

Kindergarten  
 First grade (primer)  
 Second grade (segundo)  
 Third grade (tercer)  
 Fourth grade (cuarto)  
 Fifth grade (quinto)  
 Sixth grade (sexto)  
 Seventh grade (séptimo)  
 Eighth grade (octavo)  
 Ninth grade (novenos)  
 Tenth grade (décimo)  
 Eleventh grade (undécimo)  
 Twelfth grade (duodécimo)  
(Child 1 )

---

What grade is your second child in?

¿En qué grado está su segundo hijo?

Kindergarten  
 First grade (primer)  
 Second grade (segundo)  
 Third grade (tercer)  
 Fourth grade (cuarto)  
 Fifth grade (quinto)  
 Sixth grade (sexto)  
 Seventh grade (séptimo)  
 Eighth grade (octavo)  
 Ninth grade (novenos)  
 Tenth grade (décimo)  
 Eleventh grade (undécimo)  
 Twelfth grade (duodécimo)  
(Child 2)

---

What grade is your third child in?

¿En qué grado está su tercer hijo?

- Kindergarten
  - First grade (primer)
  - Second grade (segundo)
  - Third grade (tercer)
  - Fourth grade (cuarto)
  - Fifth grade (quinto)
  - Sixth grade (sexto)
  - Seventh grade (séptimo)
  - Eighth grade (octavo)
  - Ninth grade (noveno)
  - Tenth grade (décimo)
  - Eleventh grade (undécimo)
  - Twelfth grade (duodécimo)
- (Child 3)

---

What grade is your fourth child in?

¿En qué grado está su cuarto hijo?

- Kindergarten
  - First grade (primer)
  - Second grade (segundo)
  - Third grade (tercer)
  - Fourth grade (cuarto)
  - Fifth grade (quinto)
  - Sixth grade (sexto)
  - Seventh grade (séptimo)
  - Eighth grade (octavo)
  - Ninth grade (noveno)
  - Tenth grade (décimo)
  - Eleventh grade (undécimo)
  - Twelfth grade (duodécimo)
- (Child 4)

---

What grade is your fifth child in?

¿En qué grado está su quinto hijo?

- Kindergarten
  - First grade (primer)
  - Second grade (segundo)
  - Third grade (tercer)
  - Fourth grade (cuarto)
  - Fifth grade (quinto)
  - Sixth grade (sexto)
  - Seventh grade (séptimo)
  - Eighth grade (octavo)
  - Ninth grade (noveno)
  - Tenth grade (décimo)
  - Eleventh grade (undécimo)
  - Twelfth grade (duodécimo)
- (Child 5)

---

What grade is your sixth child in?

¿En qué grado está su sexto hijo?

- Kindergarten
  - First grade (primer)
  - Second grade (segundo)
  - Third grade (tercer)
  - Fourth grade (cuarto)
  - Fifth grade (quinto)
  - Sixth grade (sexto)
  - Seventh grade (séptimo)
  - Eighth grade (octavo)
  - Ninth grade (noveno)
  - Tenth grade (décimo)
  - Eleventh grade (undécimo)
  - Twelfth grade (duodécimo)
- (Child 6)

What grade is your seventh child in?

¿En qué grado está su séptimo hijo?

- Kindergarten  
 First grade (primer)  
 Second grade (segundo)  
 Third grade (tercer)  
 Fourth grade (cuarto)  
 Fifth grade (quinto)  
 Sixth grade (sexto)  
 Seventh grade (séptimo)  
 Eighth grade (octavo)  
 Ninth grade (noveno)  
 Tenth grade (décimo)  
 Eleventh grade (undécimo)  
 Twelfth grade (duodécimo)  
 (Child 7)

Have any of your children ever been held back a grade at school?

- Yes    No    Prefer not to answer

¿Alguno de sus hijos repitió un grado en escuela?

1. Sí  
 2. No  
 3. Prefiero no responder

Are there any aspects of in person school that your child is not receiving due to remote learning? (check all that apply)

¿Hay algunos aspectos de escuela que ahora falta su hijo/a debido al aprendizaje remoto? (Marque todos que apliquen)

1. Servicios de educación especial  
 2. Consejería escolar  
 3. Ayuda despues de la escuela  
 4. La socialización con los compañeros  
 5. Programa de cuidado infantil  
 6. Oportunidades por estudio de trabajo  
 7. Ninguno de los arriba  
 8. Otro  
 9. Prefiero no responder

- Special education services  
 School counseling  
 After school help  
 Socialization with peers  
 After school childcare program  
 Work study opportunities  
 None of the above  
 Other  
 Prefer not to answer

If other, please specify

Si es otro, por favor especifique

How have your child(ren) been staying active during the Covid 19 pandemic? (check all that apply)

¿Cómo mantenerse activo sus hijos durante la pandemia de Covid 19?

1. Practicar deportes afuera  
 2. Jugar afuera con los hermanos o amigos  
 3. Ir a caminar  
 4. Hacer ejercicios adentro  
 5. Ninguna actividad física  
 6. Otro  
 7. Ninguno de los arriba

- Playing outside sports  
 Playing outside with siblings or friends  
 Going for walks  
 Exercising indoors  
 No physical activity  
 Other  
 None of the above

If other, how has your child been staying active?

Si es otro, ¿cómo mantenerse activo sus hijos?

Many schools have created a free lunch program that can be picked up at the school, have you utilized this program at your child's school?

- Yes  
 No  
 My child's school does not have this program  
 Prefer not to answer

Muchas escuelas han creado un programa de almuerzo gratis que puede recoger en la escuela, ¿ha utilizado este programa en la escuela de su hijo?

1. Sí
2. No
3. La escuela de mi hijo no tiene este programa
4. Prefiero no responder

Have you used any other food assistance programs during the Covid 19 Pandemic? (Check all that apply)

¿Ha utilizado un otro programa de asistencia alimentaria durante la pandemia de Covid 19? (Marque todos que apliquen)

1. Despensa de alimentos patrocinado de BMC
2. Despensa de alimentos patrocinado de una iglesia
3. Despensa de alimentos patrocinado de la comunidad
4. Programa de entrega de comestibles
5. Programa de comidas por los estudiantes durante la fin de semana
6. Ninguno de los arriba
7. Otro
8. Prefiero no responder

- BMC sponsored food pantry  
 Church sponsored food pantry  
 Community sponsored food pantry  
 Grocery delivery program  
 Weekend meal program for students  
 None of the above  
 Other  
 Prefer not to answer

If other, please specify what type of food assistance program

\_\_\_\_\_

Si es otro, por favor especifique que tipo de asistencia alimentaria usa

**This section of the survey inquires about your current housing situation. We are trying to understand the hardships that the Covid 19 Pandemic might have brought upon our BMC patients.**

**Esta sección del cuestionario pregunta sobre su situación de vivienda actual. Queremos entender los dificultades de nuestros pacientes durante la pandemia de Covid 19.**

Including yourself, how many people do you live with?

Incluyendo usted misma, ¿con cuantas personas vive usted?

\_\_\_\_\_

What type of home are you currently living in?

¿En qué tipo de hogar vive usted actualmente?

1. Casa unifamiliar
2. Casa multifamiliar
3. Apartamento
4. Condominio
5. Refugio para personas sin hogar
6. Otro
7. Prefiero no responder

- Single family house  
 Multiple family house  
 Apartment  
 Condo  
 Shelter  
 Other  
 Prefer not to answer

---

If other, please specify

Si es otro, por favor especifique

---



---

How long have you lived in your current home? (answer in YEARS, if less than 1 year please answer below)

\_\_\_\_\_ (Years)

¿Por cuánto tiempo vive en su vivienda actual? (responda en años, si es menos de un año, responda abajo)

---

How long have you lived in your current home (in MONTHS if less than 1 year)

\_\_\_\_\_ (Months)

Por cuánto tiempo vive en su vivienda actual? (responda en meses si es menos de un año)

---

Do you own or rent the home that you currently live in?

- Own  
 Rent  
 None of the above  
 Prefer not to answer

¿Es propietaria o se alquila su vivienda actual?

1. Soy propietaria
  2. Alquilo
  3. Ninguno de los arriba
  4. Prefiero no responder
- 

How many bedrooms are in your home?

¿Cuántas habitaciones hay en su hogar?

---

How many bathrooms are in your home?

¿Cuántos baños hay en su hogar?

---

Do you have your own room in the shelter you are staying in?

- Yes    No

¿Tiene su propia habitación en el refugio donde queda?

1. Sí
  2. No
- 

Do you have your own bathroom in the shelter you are staying in?

- Yes    No

¿Tiene su propio baño en el refugio donde queda?

1. Sí
  2. No
- 

What type of fuel do you use to heat your home?

- Oil    Electricity    Gas  
 Other    Don't know

¿Qué tipo de combustible utiliza para calentar su hogar?

1. Petróleo
2. Electricidad
3. Gas
4. Otro
5. No sé

---

If other, please specify

Si es otro, por favor especifique

---

What type of stove do you use for cooking?

- Gas    Electric    Other  
 Don't know

¿Qué tipo de estufa utiliza para cocinar?

1. Gas
  2. Eléctrica
  3. Otro
  4. No sé
- 

If other, please specify

Si es otro, por favor especifique

---

Does anyone living in your home smoke cigarettes?

- Yes    No    Prefer not to answer

¿Alguien que vive en su casa fuma cigarrillos?

1. Sí
  2. No
  3. Prefiero no responder
- 

How many people in your home smoke cigarettes?

¿Cuántas personas en su casa fuma cigarrillos?

---

Where are the cigarettes smoked?

- Inside the home  
 Outside the home  
 Both inside and outside the home  
 Prefer not to answer

¿Dónde fuma los cigarrillos?

1. Dentro de la casa
  2. Fuera de la casa
  3. Dentro y fuera de la casa
  4. Prefiero no responder
- 

Does anyone living in your home vape?

- Yes    No    Prefer not to answer

¿Alguien que vive en su casa fuma cigarrillos electrónicos?

---

Many of our families are struggling to keep up with rent. Are you behind on rent?

- Yes    No    Prefer not to answer

Muchas de nuestras familias están luchando para pagar el alquiler. Está atrasado en el alquiler?

1. Sí
  2. No
  3. Prefiero no responder
- 

Are you at risk of eviction?

- Yes    No    Prefer not to answer

Está en riesgo de ser desalojado?

1. Sí
2. No
3. Prefiero no responder



Many of our families are struggling to keep up with housing payments. Are you behind on paying your mortgage?

Yes  No  Prefer not to answer

Muchas de nuestras familias están luchando para pagar su hipoteca. ¿Está atrasado en el hipoteca?

1. Sí
2. No
3. Prefiero no responder

Are you at risk of foreclosure?

Yes  No  Prefer not to answer

¿Está en riesgo de ejecución hipotecaria?

1. Sí
2. No
3. Prefiero no responder

**Because of the Covid 19 Pandemic we have seen an increase in doctors and patients participating in healthcare over the phone or on video calls. This section of the questionnaire is focused on understanding if and how our participants have interacted with telehealth during the Covid 19 Pandemic.**

**Durante la pandemia de Covid 19 hemos visto un aumento de médicos y pacientes que participan en la atención médica por teléfono o en videollamadas. Esta sección del cuestionario es enfocada a entender como nuestros participantes han interactuado con la telesalud durante la pandemia de Covid 19.**

How do you normally get to your healthcare appointments?

¿Normalmente, cómo llega a sus citas médicas?

1. Bus
2. Tren/ Metro
3. Conducir
4. Un amigo o miembro de mi familia me lleva
5. Tomar un Uber o Lyft
6. Caminar
7. Ir en bici
8. Otro

- Bus  
 Train  
 Drive myself  
 Get a ride with a family member or friend  
 Take an Uber or Lyft  
 Walk  
 Bike  
 Other

If other, please specify

Si es otro, por favor especifique

Since the onset of the Covid 19 Pandemic in March 2020 have you or your children participated in phone or video calls for health purposes?

¿Ha participado usted o su hijo(s) en una cita médica por llamada o video llamada desde el principio de la pandemia de Covid 19 en marzo 2020?

1. Sí- yo
2. Sí- mi hijo/a
3. Sí- mi hijo/a y yo
4. No
5. Prefiero no responder

- Yes-me  
 Yes- my child  
 Yes- both me and my child  
 No  
 Prefer not to answer

What device(s) do you typically use for telehealth visits? (Check all that apply)

- Desktop computer
- Laptop computer or chromebook
- Tablet or iPad
- Smartphone
- Other
- Prefer not to answer

¿Qué tipo de aparato(s) usa para participar en las citas de la telesalud? (Marque todos que apliquen)

1. computadora de escritorio
2. portátil o Chromebook
3. tableta o iPad
4. teléfono inteligente
5. otro
6. Prefiero no responder

If other, what type of device do you use for telehealth appointments? \_\_\_\_\_

Si es otro, ¿qué tipo de aparato usa para sus citas de telesalud?

What type(s) of visits did you have over the phone or video? (Check all that apply)

- Adult Primary Care
- Pediatric Primary Care
- Developmental/Behavioral Pediatrics
- Neurology
- Psychiatry/Psychology
- Endocrinology
- Eye appointment
- GI
- Hematology
- Cardiology
- OB/GYN
- Dermatology
- Dental Clinic
- Other
- Prefer not to answer

¿Qué tipo(s) de cita tiene por llamada o videollamada? (Marque todos que apliquen)

1. atención primaria para adultos
2. atención primaria pediátrica
3. pediatría del desarrollo
4. la neurología
5. la psiquiatría o la psicología
6. la endocrinología
7. la oftalmóloga
8. gastrointestinal
9. la hematología
10. la cardiología
11. tocoginecología
12. la dermatología
13. la odontología
14. otro
15. Prefiero no responder

If other, what type of visit did you have on the phone or through video? \_\_\_\_\_

Si es otro, ¿qué tipo de cita tuve por una llamada o videollamada?

When compared to previous in-person appointments, I feel that telehealth meets all of my healthcare needs.

- Strongly agree
- Agree
- Neutral
- Disagree
- Strongly disagree
- Prefer not to answer

Comparado con mis citas anteriores (en persona), siento como la telesalud satisfacer mis necesidades médicas.

1. Totalmente de acuerdo
2. De acuerdo
3. Neutral
4. En desacuerdo
5. Totalmente en desacuerdo
6. Prefiero no responder

What were your specific concerns related to why telehealth did not meet your needs?

---

¿Cuáles son sus preocupaciones específicas relacionado con por qué la telesalud no satisfacer sus necesidades?

Please check off any advantages of having a doctors appointment over the phone or on video (Check all that apply)

Por favor marque alguna ventaja de tener una cita medica por llamada o videollamada (Marque todos que apliquen)

1. Ahorro tiempo porque no viajar
2. No necesito arreglar el transporte
3. Reducir el riesgo de enfermarse
4. Es fácil para programar
5. No necesito buscar el cuidado de los niños
6. Comodidad aumentado al hablar sobre problemas de salud
7. Otro
8. Ninguno de los arriba
9. Prefiero no responder

- Saving time by not traveling
- Not having to arrange transportation
- Reducing the risk of getting sick by staying home
- Ease of scheduling
- Not having to find childcare
- Increased comfort talking about health problems
- Other
- None of the above
- Prefer not to answer

Please list any other advantages about having telehealth appointments

---

Por favor describa cualquier otra ventaja de las citas de telesalud

Please also check off any disadvantages you saw while having telehealth appointments (Check all that apply)

Por favor marque alguna desventaja de las citas de telesalud (Marque todos que apliquen)

1. Falta de examen físico
2. No tengo un lugar tranquilo para hablar en privado con mi médico
3. Problemas tecnológicos durante mi cita
4. Comodidad reducida hablando sobre problemas de salud
5. Otro
6. Ninguno de los arriba
7. Prefiero no responder

- Lack of physical examination
- I don't have a quiet area to speak privately with my doctor
- Technological issues during my appointment
- Reduced comfort talking about health problems
- Other
- None of the above
- Prefer not to answer

Please list any other disadvantages about having telehealth appointments

---

Por favor describa cualquier otra desventaja de las citas de telesalud

How likely are you to continue to schedule telehealth appointments after the Covid 19 pandemic restrictions are over?

¿Cuál es la probabilidad de continua hacer citas de telesalud después de las restricciones de la pandemia de Covid 19?

1. Muy probable
2. Probable
3. Neutral
4. Improbable
5. Muy improbable
6. Prefiero no responder

- Very likely  
 Somewhat likely  
 Indifferent  
 Somewhat unlikely  
 Very unlikely  
 Prefer not to answer

What type of visits would you continue to schedule as telehealth after the Covid 19 pandemic restrictions? (Check all that apply)

¿Qué tipo de cita continuaría de hacer como telesalud después de las restricciones de la pandemia de Covid 19? (Marque todos que apliquen)

1. atención primaria para adultos
2. atención primaria pediátrica
3. pediatría del desarrollo
4. la neurología
5. la psiquiatría o la psicología
6. la endocrinología
7. la oftalmóloga
8. gastrointestinal
9. la hematología
10. la cardiología
11. tocoginecología
12. la dermatología
13. la odontología
14. otro
15. Prefiero no responder

- Adult Primary Care  
 Pediatric Primary Care  
 Developmental/Behavioral Pediatrics  
 Neurology  
 Psychiatry/Psychology  
 Endocrinology  
 Eye appointment  
 GI  
 Hematology  
 Cardiology  
 OB/GYN  
 Dermatology  
 Dental Clinic  
 Other  
 Prefer not to answer

If other, what type of appointment would you continue as telehealth after the Covid 19 pandemic restrictions? \_\_\_\_\_

Si es otro, ¿qué tipo de cita continuaría como telesalud después de las restricciones de la pandemia de Covid 19?

**This section of the questionnaire is about resources and your access to food before and during the Covid 19 Pandemic, beginning in March 2020. We are looking to better understand the hardships that were created by the Covid 19 Pandemic.**

**Esta sección del cuestionario es sobre sus recursos y su acceso a la comida antes de y durante la pandemia de Covid 19, hasta el principio en Marzo 2020. Queremos entender los dificultades creado por la pandemia de Covid 19.**

In the last 12 months, did you ever run out of food before you were able to purchase more?

- Yes, BEFORE the pandemic  
 Yes, DURING the pandemic  
 Yes, BOTH before and during the pandemic  
 No  
 Prefer not to answer

Durante los últimos 12 meses ha queda sin comida antes de podía comprar más?

1. Sí, ANTES de la pandemia
2. Sí, DURANTE la pandemia
3. Sí antes de Y durante la pandemia
4. No
5. Prefiero no responder

In the last 12 months, were you ever unable to afford to eat balanced meals?

- Yes, BEFORE the pandemic  
 Yes, DURING the pandemic  
 Yes, BOTH before and during the pandemic  
 No  
 Prefer not to answer

Durante los últimos 12 meses había alguna vez que no se puede permitir comidas balanceadas?

1. Sí, ANTES de la pandemia
2. Sí, DURANTE la pandemia
3. Sí antes de Y durante la pandemia
4. No
5. Prefiero no responder

During the last 12 months, have you or other adults in your household cut the size of your meals or skip meals because there wasn't enough money for food?

- Yes, BEFORE the pandemic  
 Yes, DURING the pandemic  
 Yes, BOTH before and during the pandemic  
 No  
 Prefer not to answer

Durante los últimos 12 meses necesita usted o otros adultos en su casa come menos durante comidas o falta comidas porque no hay suficiente dinero para comida?

1. Sí, ANTES de la pandemia
2. Sí, DURANTE la pandemia
3. Sí antes de Y durante la pandemia
4. No
5. Prefiero no responder

If yes, how often did you or other adults in your household cut the size of your meals or skip meals because there wasn't enough money for food? (check all that apply)

- Almost every month before the pandemic  
 Some months before the pandemic  
 Once or twice before the pandemic  
 Almost every month during the pandemic  
 Some months during the pandemic  
 Once or twice during the pandemic  
 Not sure  
 Prefer not to answer

De ser así con que frecuencia come menos durante comidas o falta comidas? (Marque todos que apliquen)

1. Casi todos los meses antes de la pandemia
2. Unos meses antes de la pandemia
3. Un par de veces antes de la pandemia
4. Casi todos los meses durante la pandemia
5. Unos meses durante la pandemia
6. Un par de veces durante la pandemia
7. No sé
8. Prefiero no responder

In the last 12 months, did you ever eat less than you felt you should because there wasn't enough money to buy food?

Durante los últimos 12 meses comía menos porque no había suficiente dinero para comprar comida?

1. Sí, ANTES de la pandemia
2. Sí, DURANTE la pandemia
3. Sí antes de Y durante la pandemia
4. No
5. Prefiero no responder

- Yes, BEFORE the pandemic  
 Yes, DURING the pandemic  
 Yes, BOTH before and during the pandemic  
 No  
 Prefer not to answer

In the last 12 months, were you ever hungry but didn't eat because you couldn't afford enough food?

Durante los últimos 12 meses, tenía hambre pero no comer porque no podía comprar comida?

1. Sí, ANTES de la pandemia
2. Sí, DURANTE la pandemia
3. Sí antes de Y durante la pandemia
4. No
5. Prefiero no responder

- Yes, BEFORE the pandemic  
 Yes, DURING the pandemic  
 Yes, BOTH before and during the pandemic  
 No  
 Prefer not to answer

**Because of the disruption that the Covid 19 Pandemic has caused to daily life, people may be feeling increased stress levels and need for mental healthcare services. This portion of the questionnaire aims to understand how this has affected our BMC patients.**

**Por causa de la interrupción que la pandemia de Covid 19 ha causado a la vida diaria, muchas personas sienten más estresados y la necesidad para los servicios de salud mental. Esta sección del cuestionario tiene objetivo de entender cómo este ha afectado nuestros pacientes.**

How would you rate the level of stress in your life in general?

- Low     Moderate     High

En general, ¿cómo evaluaría el nivel de estrés en su vida?

1. Bajo
2. Moderado
3. Alto

How would you rate the level of stress in your life since the beginning of the Covid 19 Pandemic in March 2020?

- Low     Moderate     High

¿Cómo evaluaría el nivel de estrés en su vida desde el principio de la pandemia de Covid 19 en Marzo 2020?

1. Bajo
2. Moderado
3. Alto

Since the beginning of the Covid 19 Pandemic in March 2020 how often have you felt that you were NOT able to control the important things in your life?

Desde el principio de la pandemia de Covid 19 en Marzo 2020, con qué frecuencia siente como no puede controlar las cosas importantes en su vida?

1. Nunca
2. Casi nunca
3. A veces
4. Casi todo el tiempo
5. Todo el tiempo
6. Prefiero no responder

- Never  
 Almost never  
 Sometimes  
 Almost all of the time  
 All of the time  
 Prefer not to answer

Compared to your stress level prior to the beginning of the Covid 19 Pandemic in March 2020 how do you rate your stress level?

Comparado con su nivel de estrés antes del principio de la pandemia de Covid 19 en Marzo 2020, cómo evaluaría su nivel de estrés?

1. Más bajo
2. Igual
3. Más alto

- Lower     About the same  
 Higher

How would you rate your level of stress regarding your child's education while they are doing remote learning?

¿Cómo evaluaría su nivel de estrés sobre la educación de su hijo cuando hacer el aprendizaje remoto?

1. Sin estrés
2. Estrés leve
3. Estrés moderado
4. Estrés severo
5. Prefiero no responder

- No stress  
 Mild stress  
 Moderate stress  
 Severe stress  
 Prefer not to answer

Since the beginning of the Covid 19 Pandemic in March 2020 have you experienced any of these major stressful events? (Check all that apply)

¿Ha experimentado alguno de estos eventos estresantes desde el principio de la pandemia de Covid 19? (Marque todos que apliquen)

1. Muerte de un miembro de la familia
2. Divorcio/ruptura
3. Perdió un empleo
4. Enfermedad severa
5. Enfermedad severa de un miembro de la familia
6. Muda/ perdió el hogar
7. Desalojo
8. Ninguno de los arriba
9. Prefiero no responder

- Death of a family member  
 Divorce/ breakup  
 Lost job  
 Severe illness  
 Severe illness of a family member  
 Moved or lost where I was staying  
 Eviction  
 None of the above  
 Prefer not to answer

Did you or your child seek mental healthcare services due to the stress of the Covid 19 Pandemic that you had not received prior?

- Yes- me  
 Yes- my child  
 Yes- both me and my child  
 No  
 Prefer not to answer

¿Busca usted o su hijo/a servicios de salud mental debido al estrés de la pandemia de Covid 19 que no ha recibido antes?

1. Sí- yo
2. Sí- mi hijo/a
3. Sí mi hijo/a y yo
4. No
5. Prefiero no responder

**We would like to gain an understanding of our participants feelings regarding a Coronavirus (Covid 19) vaccine. Please answer the following questions based on your opinions for when a vaccine becomes available. If you have received the vaccine, please still respond to the questions regarding your attitudes towards it.**

**Queremos entender los sentimientos de nuestros participantes sobre la vacuna de Covid 19, Por favor conteste las preguntas sobre sus opiniones cuando hay una vacuna disponible.**

When a Covid 19 vaccine becomes available how likely are you to get the vaccine yourself?

- Highly likely  
 Very likely  
 Neutral  
 Unlikely  
 Highly unlikely  
 Prefer not to answer

Cuando una vacuna de Covid 19 está disponible, cuál es la probabilidad que se vacuna?

1. Muy probable
2. Probable
3. Neutral
4. Improbable
5. Muy improbable
6. Prefiero no responder

What are the reasons you would get the Covid 19 vaccine? (Check all that apply)

- To stay healthy  
 To safely return to work  
 To feel safer in public places  
 To keep my friends and family healthy  
 Other

¿Cuáles son las razones que se vacunaría de Covid 19? (Marque todos que apliquen)

1. Mantenerme saludable
2. Volver a trabajo sin peligro
3. Sentirse más seguro en lugares públicos
4. Mantenerse sanos a mis amigos y familia
5. Otro

If other, please specify why you would get the Covid 19 vaccine

Si es otro, por favor especifique porque se vacunaría de Covid 19



What are the reasons you would not get the Covid 19 vaccine? (Check all that apply)

¿Cuáles son las razones que no se vacunaría de Covid 19? (Marque todos que apliquen)

1. Ya tuve Covid 19
2. No pienso que necesito vacunarme
3. Estoy preocupada sobre la seguridad y los efectos secundarios
4. No creo en una vacuna de Covid 19
5. Otro

- I already had Covid 19  
 I don't think I need to get the vaccine  
 I am concerned about the safety and side effects  
 I don't believe in a vaccine for Covid 19  
 Other

If other, please specify why you would not get the Covid 19 vaccine

Si es otro, por favor especifique porque no se vacunaría de Covid 19

When a Covid 19 Vaccine becomes available how likely are you to have your child get the vaccine?

Cuando una vacuna de Covid 19 está disponible, cuál es la probabilidad que se vacuna su hijo/a?

1. Muy probable
2. Probable
3. Neutral
4. Improbable
5. Muy improbable
6. No se aplica a mi
7. Prefiero no responder

- Highly likely  
 Very likely  
 Neutral  
 Unlikely  
 Highly unlikely  
 Does not apply to me  
 Prefer not to answer

What are the reasons you would get the Covid 19 vaccine for your child(ren)? (Check all that apply)

¿Cuáles son las razones que se vacunaría su hijo/a de Covid 19? (Marque todos que apliquen)

1. Mantenerse saludable
2. Volver a escuela sin peligro
3. Sentirse más seguro en lugares públicos
4. Mantenerse sanos a mis amigos y familia
5. Otro

- To keep them healthy  
 To safely return to school  
 To feel safer in public places  
 To keep friends and family healthy  
 Other

If other, please specify why you would get the Covid 19 vaccine for your child(ren)

Si es otro, por favor especifique porque se vacunaría su hijo/a de Covid 19

---

What are the reasons you would not get the Covid 19 vaccine for your child? (Check all that apply)

¿Cuáles son las razones que no se vacunaría su hijo/a de Covid 19? (Marque todos que apliquen)

1. Ya tuvo Covid 19
2. Niños no necesitan vacunarse porque no se ponen muy enfermos de Covid 19
3. Quiero ver cómo afectar a los demás antes de mi hijo/a se vacuna
4. Estoy preocupada sobre la seguridad y los efectos secundarios
5. Otro

- My child(ren) already had Covid 19
- Children don't need a vaccine because they don't get very sick from Covid 19
- I want to see how the vaccine affects others before giving it to my child
- I am concerned about the safety and side effects
- Other

---

If other, please specify why you would not get a Covid 19 vaccine for your child

Si es otro, por favor especifique porque no se vacunaría su hijo/a de Covid 19

---

Who completed this form?

¿Quién completó este formulario?

1. Madre
2. Niño/a adulto/a

- Mother
- Adult Child

---

Interview Date

Fecha
