# Supplementary material for: Boston Birth Cohort profile: rationale and study design
Source: PubMed Central journal article supplement (PMC9844822; doi:10.1097/pn9.0000000000000011), 2022-08-18
Supplement: NIHMS1818381-supplement-_7.pdf [file NIHMS1818381-supplement-_7.pdf]

# NIDA Clinical Trials Network

## Fagerstrom Test for Nicotine Dependence (FND)

Segment: --

Visit Number: --

Date of Assessment: (mm/dd/yyyy) --/~/----

**Do you currently smoke cigarettes?**

No

Yes

If "yes," read each question below. For each question, enter the answer choice which best describes your response.

**1. How soon after you wake up do you smoke your first cigarette?**

Within 5 minutes

31 to 60 minutes

6 to 30 minutes

After 60 minutes

**2. Do you find it difficult to refrain from smoking in places where it is forbidden (e.g., in church, at the library, in the cinema)?**

No

Yes

**3. Which cigarette would you hate most to give up?**

The first one in the morning

Any other

**4. How many cigarettes per day do you smoke?**

10 or less

21 to 30

11 to 20

31 or more

**5. Do you smoke more frequently during the first hours after waking than during the rest of the day?**

No

Yes

**6. Do you smoke when you are so ill that you are in bed most of the day?**

No

Yes

**Comments:**

# NIDA Clinical Trials Network

## Fagerstrom Test for Nicotine Dependence (FND)

### ***Instructions***

Clinic personnel will follow standard scoring to calculate score based on responses.

Your score was: (your level of dependence on nicotine is):      --
