# Supplementary material for: Boston Birth Cohort profile: rationale and study design
Source: PubMed Central journal article supplement (PMC9844822; doi:10.1097/pn9.0000000000000011), 2022-08-18
Supplement: NIHMS1818381-supplement-_8.pdf [file NIHMS1818381-supplement-_8.pdf]

# Follow-UP

Family ID

\_\_\_\_\_

Visit ID

(IN\_) \_\_\_\_\_

Date of last interview

\_\_\_\_\_

Interview Date

\_\_\_\_\_

Interviewer's Name

(First and last name) \_\_\_\_\_

Location of Interview

\_\_\_\_\_

Child's home zipcode

¿Qué es su código poste?

\_\_\_\_\_

## SCREENING: FOR INTERVIEWS

### Eligibility

Are you this child's legal guardian?

- Yes  
 No  
(IF NO STOP)

¿Tiene usted custodia legal de...?

Are you this child's biological mother?

- Yes  
 No

¿Usted es la madre biológica de..., verdad?

Mother's Name Matches Query

- Yes  
 No

Child's Name Matches Query

- Yes  
 No

## IF NO STOP

### Section I. Family Pedigree

Can I ask you a few questions about your child's biological father's medical history?

- Yes  
 No

¿Puedo preguntar sobre el historial médico del padre?

---

Father's Birth Month

¿Cuál es su fecha de nacimiento?

\_\_\_\_\_ (Month)

---

Father's Birth Year

¿Cuál es su fecha de nacimiento?

\_\_\_\_\_ (Year)

---

Father's Medical History

Usted sabe si el padre de ...tiene algunas enfermedades como

- Alergias alimentarias
- Eccema
- Asma
- Alergias estacionales
- Alergias a medicinas
- Otros
- Reflujo de ácido

- Food Allergy
- Eczema
- Asthma
- Hay Fever
- Drug Allergy
- Other Allergies
- EE
- GERD

---

Do you have any other children with her/his father?  
(Full sibling)

- Yes
- No

¿Tiene ud. otros hijos con el padre de (index kid)?

---

Full Sibling 1. Gender

- Male
- Female

---

Full Sibling 1 Birth Month

¿Cuál es la fecha de nacimiento de el/ella?

\_\_\_\_\_ (Month)

---

Full Sibling 1 Birth Year

¿Cuál es la fecha de nacimiento de el/ella?

\_\_\_\_\_ (Year)

---

Full Sibling 1 Medical History

Tiene algunas enfermedades como

- Alergias alimentarias
- Eccema
- Asma
- Alergias estacionales
- Alergias a medicinas
- Otros
- Reflujo de ácido

- Food Allergy
- Eczema
- Asthma
- Hay Fever
- Drug Allergy
- Other Allergies
- EE
- GERD

---

Full Sibling 2 Gender

- Male
- Female

---

Full Sibling 2 Birth Month

\_\_\_\_\_ (Month)

---

Full Sibling 2 Birth Year

\_\_\_\_\_ (year)

---

Full Sibling 2 Medical History

- Food Allergy
- Eczema
- Asthma
- Hay Fever
- Drug Allergy
- Other Allergies
- EE
- GERD

---

Full Sibling 3 Gender

- Male
- Female

---

Full Sibling 3 Birth Month

\_\_\_\_\_

(Month)

---

Full Sibling 3 Birth Year

\_\_\_\_\_

(Year)

---

Full Sibling 3 Medical History

- Food Allergy
- Eczema
- Asthma
- Hay Fever
- Drug Allergy
- Other Allergies
- EE
- GERD

---

Full Sibling 4 Gender

- Male
- Female

---

Full Sibling 4 Birth Month

\_\_\_\_\_

(Month)

---

Full Sibling 4 Birth Year

\_\_\_\_\_

(Year)

---

Full Sibling 4 Medical History

- Food Allergy
- Eczema
- Asthma
- Hay Fever
- Drug Allergy
- Other Allergies
- EE
- GERD

---

Full Sibling 5 Gender

- Male
- Female

---

Full Sibling 5 Birth Month

\_\_\_\_\_

(Month)

Full Sibling 5 Birth Year

(Year)

Full Sibling 5 Medical History

- Food Allergy  
 Eczema  
 Asthma  
 Hay Fever  
 Drug Allergy  
 Other Allergies  
 EE  
 GERD

### 1. Since the last interview, has your child had any of the following illnesses?

#### ¿en el último año, tenía...algunas enfermedades como?

|                                                                        | Yes                   | No                    | Unsure                |
|------------------------------------------------------------------------|-----------------------|-----------------------|-----------------------|
| Common Cold / Gripe                                                    | <input type="radio"/> | <input type="radio"/> | <input type="radio"/> |
| Gastric/intestinal infection /<br>Infección intestinal                 | <input type="radio"/> | <input type="radio"/> | <input type="radio"/> |
| Conjunctivitis/ Pink eye /<br>Conjunctivitis                           | <input type="radio"/> | <input type="radio"/> | <input type="radio"/> |
| Strep Throat / Infeccion de<br>garganta (faringitis<br>estreptocócica) | <input type="radio"/> | <input type="radio"/> | <input type="radio"/> |
| RSV/Bronchiolitis / Bronquilitis                                       | <input type="radio"/> | <input type="radio"/> | <input type="radio"/> |
| If yes, hospitalized                                                   | <input type="radio"/> | <input type="radio"/> | <input type="radio"/> |
| Bronchitis / Bronquitis                                                | <input type="radio"/> | <input type="radio"/> | <input type="radio"/> |
| Ear Infection / Infección de oreja                                     | <input type="radio"/> | <input type="radio"/> | <input type="radio"/> |
| Pneumonia / Pulmonía                                                   | <input type="radio"/> | <input type="radio"/> | <input type="radio"/> |
| Skin Infection / Infección de piel                                     | <input type="radio"/> | <input type="radio"/> | <input type="radio"/> |
| Urinary Tract Infection /<br>Infección urinaria                        | <input type="radio"/> | <input type="radio"/> | <input type="radio"/> |
| Parasite Infection / Infección de<br>parasito                          | <input type="radio"/> | <input type="radio"/> | <input type="radio"/> |
| Bone Infection (osteomyelitis) /<br>Infección de hueso                 | <input type="radio"/> | <input type="radio"/> | <input type="radio"/> |
| Meningitis                                                             | <input type="radio"/> | <input type="radio"/> | <input type="radio"/> |
| Bacteremia/Sepsis (Blood<br>Infection) / Infección de sangre           | <input type="radio"/> | <input type="radio"/> | <input type="radio"/> |
| Sinus Infection / Infección de<br>sino                                 | <input type="radio"/> | <input type="radio"/> | <input type="radio"/> |

Has your child been diagnosed with any other illnesses within the last year? / ¿En el año pasado, ... ha sido diagnosticado con algunas otras enfermedades?

Other illness specify

---

Other illness specify

---

If yes, how many times?  
Cold

---

¿Cuántas veces tenía?

If yes, how many times?  
Gastric/Intestinal Infection

---

If yes, how many times?  
Conjunctivitis

---

If yes, how many times?  
Strep Throat

---

If yes, how many times?  
Ear Infection

---

If yes, how many times?  
Pneumonia

---

If yes, how many times?  
Skin Infection

---

If yes, how many times?  
Urinary Tract Infection

---

2. Antibiotics are medicines that your doctor prescribes for illnesses caused by infections. Examples of some names of commonly prescribed antibiotics are amoxicillin and penicillin. Since the last visit did your child take any antibiotics by oral or IV. Not topical antibiotics?

- Yes
- No
- Unsure

¿En el último año, tomó antibióticos?  
Oral o intravenosa

If yes, how many times was your child prescribed an antibiotic medicine since the last visit?

---

(times)

¿Cuántas veces fue recetado un antibiótico?

3a. Is the child YOUNGER than 5 years old?

- Yes
- No

3b. Currently, did anyone other than your child's parent help in caring for your child for even part of the day? (nanny, daycare, preschool, relative)

- Yes  
 No  
 Not sure

Durante el día, hay alguna diferente de los padres que cuida de ... como

Childcare/preschool  
Days per week

\_\_\_\_\_  
(# of days per week)

Una guardería  
Cuántas días por semana

Childcare/preschool  
# of other children

\_\_\_\_\_

Una guardería  
Número de otros niños

Childcare/preschool  
Don't Know

- Don't know

Home Based Child Care (not in own home)  
# of days per week

\_\_\_\_\_  
(# of days per week)

Otra pariente / niñera en otra casa  
Cuántos días por semana

Home Based Child Care (not in own home)  
# of other children

\_\_\_\_\_  
(# of other children)

Otra pariente / niñera en otra casa  
Número de otros niños

Home Based Child Care (not in own home)

- Don't Know

In home care (in own home, nanny)  
# of days per week

\_\_\_\_\_  
(# of days per week)

Una niñera u otro pariente en su casa  
Cuántos días por semana

In Home Care (in own home, nanny)  
# of other children

\_\_\_\_\_  
(# of other children)

Una niñera u otro pariente en su casa  
Número de otros niños

In Home Care (in own home, nanny)

- Don't Know

4a. Are you, the mother, currently breastfeeding this child?

- Yes  
 No

¿Ud. Está dar el pecho este hijo ahora?

4b. If you are currently breastfeeding do you (the mother) take medications for gastrointestinal upset?

- No  
 Yes  
 Unsure

¿Ud. Toma medicinas para dolor del estómago?

If YES, which one of the following medications did you take?

- Antacids (Mylanta, Roloids, TUMS, Pepto-Bismol)  
 H2 Blockers (Pepcid AC, Zantac)  
 Proton Pump inhibitors (Aciphex, Prilosec, Preveacid, Nexium)  
 Prokinetic agents (Urecholine, Regland, Erythromycin)  
 Unsure  
 Other

If Others, specify:

(Other GI medications taken during breast feeding)

### 5. In a typical week during the period of breast feeding, how often did you (THE MOTHER) eat the following foods?

|                                                                                                                     | None                  | < 1 days              | 1-2 days              | 3-5 days              | 6-7 days              | Unsure                |
|---------------------------------------------------------------------------------------------------------------------|-----------------------|-----------------------|-----------------------|-----------------------|-----------------------|-----------------------|
| Cow's milk/Dairy Products/Cheese (Leche, queso, productos lactos)                                                   | <input type="radio"/> | <input type="radio"/> | <input type="radio"/> | <input type="radio"/> | <input type="radio"/> | <input type="radio"/> |
| Egg (Huevos)                                                                                                        | <input type="radio"/> | <input type="radio"/> | <input type="radio"/> | <input type="radio"/> | <input type="radio"/> | <input type="radio"/> |
| Peanut (including peanut butter) (Cacahuete/ maní (Incluyendo crema/mantequilla de maní)                            | <input type="radio"/> | <input type="radio"/> | <input type="radio"/> | <input type="radio"/> | <input type="radio"/> | <input type="radio"/> |
| Tree Nuts (ie almond, cashew, filbert/hazel, walnut, brazil, macadamia, pecan, pine, pistachio) / (Nueces de árbol) | <input type="radio"/> | <input type="radio"/> | <input type="radio"/> | <input type="radio"/> | <input type="radio"/> | <input type="radio"/> |
| Fish (ie salmon, tuna, catfish, cod, flounder, halibut, trout, bass) / Pescado                                      | <input type="radio"/> | <input type="radio"/> | <input type="radio"/> | <input type="radio"/> | <input type="radio"/> | <input type="radio"/> |
| Shellfish (shrimp, crab, lobster, clam, oyster, mussels) / Mariscos                                                 | <input type="radio"/> | <input type="radio"/> | <input type="radio"/> | <input type="radio"/> | <input type="radio"/> | <input type="radio"/> |
| Wheat (ie pasta, bread, cereal) / Productos de trigo                                                                | <input type="radio"/> | <input type="radio"/> | <input type="radio"/> | <input type="radio"/> | <input type="radio"/> | <input type="radio"/> |
| Soy/Tofu / Soja/tofu                                                                                                | <input type="radio"/> | <input type="radio"/> | <input type="radio"/> | <input type="radio"/> | <input type="radio"/> | <input type="radio"/> |
| Seeds (ie sesame, sunflower, pumpkin) / Semilla (sésamo)                                                            | <input type="radio"/> | <input type="radio"/> | <input type="radio"/> | <input type="radio"/> | <input type="radio"/> | <input type="radio"/> |
| Green vegetables / Verduras verdes                                                                                  | <input type="radio"/> | <input type="radio"/> | <input type="radio"/> | <input type="radio"/> | <input type="radio"/> | <input type="radio"/> |

|                                                           |                       |                       |                       |                       |                       |                       |
|-----------------------------------------------------------|-----------------------|-----------------------|-----------------------|-----------------------|-----------------------|-----------------------|
| Orange veggies (carrots, squash, etc) / Verduras naranjas | <input type="radio"/> | <input type="radio"/> | <input type="radio"/> | <input type="radio"/> | <input type="radio"/> | <input type="radio"/> |
| Fruits / Frutas                                           | <input type="radio"/> | <input type="radio"/> | <input type="radio"/> | <input type="radio"/> | <input type="radio"/> | <input type="radio"/> |
| Meats / Carne                                             | <input type="radio"/> | <input type="radio"/> | <input type="radio"/> | <input type="radio"/> | <input type="radio"/> | <input type="radio"/> |
| Beans / Frijoles                                          | <input type="radio"/> | <input type="radio"/> | <input type="radio"/> | <input type="radio"/> | <input type="radio"/> | <input type="radio"/> |
| Rice / Arroz                                              | <input type="radio"/> | <input type="radio"/> | <input type="radio"/> | <input type="radio"/> | <input type="radio"/> | <input type="radio"/> |

6. At present, does your child take any nutritional supplements or vitamins?  Yes  
 No

¿Toma ... algunas vitaminas?

**If YES, on average how many days per week does your child take a nutritional supplement or vitamin?**

**¿Cuántas días toma... vitaminas en una semana?**

|                           | None                  | 1-2 days              | 3-4 days              | 5-6 days              | Everyday              |
|---------------------------|-----------------------|-----------------------|-----------------------|-----------------------|-----------------------|
| 7. Multivitamin/polyvisol | <input type="radio"/> | <input type="radio"/> | <input type="radio"/> | <input type="radio"/> | <input type="radio"/> |
| 8. Trivisol               | <input type="radio"/> | <input type="radio"/> | <input type="radio"/> | <input type="radio"/> | <input type="radio"/> |
| 9. Calcium Supplement     | <input type="radio"/> | <input type="radio"/> | <input type="radio"/> | <input type="radio"/> | <input type="radio"/> |
| 10. Pediasure/Ensure      | <input type="radio"/> | <input type="radio"/> | <input type="radio"/> | <input type="radio"/> | <input type="radio"/> |
| 11. Other                 | <input type="radio"/> | <input type="radio"/> | <input type="radio"/> | <input type="radio"/> | <input type="radio"/> |

Other specify: \_\_\_\_\_

7a. Does the multivitamin contain extra iron?  Yes  
 No  
¿Contiene hierro adicional?  Unsure

7b. Does the multivitamin contain extra calcium?  Yes  
 No  
¿Contiene calcio adicional?  Unsure

**12a. At present, how often does your child eat the following foods per week?**

**¿Ahora, me diré una lista de comidas u Ud. Me dirá cuántas veces por semana... las come? Cuantos días por semana come...**

|                                                                   | None                  | < 1 day               | 1-2 days              | 3-5 days              | 6-7 days              | Unsure                |
|-------------------------------------------------------------------|-----------------------|-----------------------|-----------------------|-----------------------|-----------------------|-----------------------|
| Cow's milk/Dairy Products/Cheese / Leche, queso, productos lactos | <input type="radio"/> | <input type="radio"/> | <input type="radio"/> | <input type="radio"/> | <input type="radio"/> | <input type="radio"/> |
| Eggs / Huevos                                                     | <input type="radio"/> | <input type="radio"/> | <input type="radio"/> | <input type="radio"/> | <input type="radio"/> | <input type="radio"/> |



|                                                                                                                   |                       |                       |                       |                       |                       |                       |
|-------------------------------------------------------------------------------------------------------------------|-----------------------|-----------------------|-----------------------|-----------------------|-----------------------|-----------------------|
| Peanut (Including peanut butter) / Cacahuete/ maní (Incluyendo crema/mantequilla de maní)                         | <input type="radio"/> | <input type="radio"/> | <input type="radio"/> | <input type="radio"/> | <input type="radio"/> | <input type="radio"/> |
| Tree Nuts (ie almond, cashew, filbert/hazel, walnut, brazil, macadamia, pecan, pine, pistachio) / Nueces de árbol | <input type="radio"/> | <input type="radio"/> | <input type="radio"/> | <input type="radio"/> | <input type="radio"/> | <input type="radio"/> |
| Fish (ie salmon, tuna, catfish, cod, flounder, halibut, trout, bass) / Pescado                                    | <input type="radio"/> | <input type="radio"/> | <input type="radio"/> | <input type="radio"/> | <input type="radio"/> | <input type="radio"/> |
| Shellfish (ie shrimp, crab, lobster, clam, oyster, mussels) / Mariscos                                            | <input type="radio"/> | <input type="radio"/> | <input type="radio"/> | <input type="radio"/> | <input type="radio"/> | <input type="radio"/> |
| Wheat (ie pasta, bread, cereal) / Productos de trigo                                                              | <input type="radio"/> | <input type="radio"/> | <input type="radio"/> | <input type="radio"/> | <input type="radio"/> | <input type="radio"/> |
| Soy/Tofu / Soja/tofu                                                                                              | <input type="radio"/> | <input type="radio"/> | <input type="radio"/> | <input type="radio"/> | <input type="radio"/> | <input type="radio"/> |
| Seeds (ie sesame, sunflower, pumpkin) / Semilla (sésamo)                                                          | <input type="radio"/> | <input type="radio"/> | <input type="radio"/> | <input type="radio"/> | <input type="radio"/> | <input type="radio"/> |
| Green vegetables / Verduras verdes                                                                                | <input type="radio"/> | <input type="radio"/> | <input type="radio"/> | <input type="radio"/> | <input type="radio"/> | <input type="radio"/> |
| Orange veggies (carrots, squash, etc) / Verduras naranjas                                                         | <input type="radio"/> | <input type="radio"/> | <input type="radio"/> | <input type="radio"/> | <input type="radio"/> | <input type="radio"/> |
| Fruits / Frutas                                                                                                   | <input type="radio"/> | <input type="radio"/> | <input type="radio"/> | <input type="radio"/> | <input type="radio"/> | <input type="radio"/> |
| Fruit Juice (without calcium) / jugo de fruta (sin calcio)                                                        | <input type="radio"/> | <input type="radio"/> | <input type="radio"/> | <input type="radio"/> | <input type="radio"/> | <input type="radio"/> |
| Calcium-fortified Juice / jugo de fruta (con calcio)                                                              | <input type="radio"/> | <input type="radio"/> | <input type="radio"/> | <input type="radio"/> | <input type="radio"/> | <input type="radio"/> |
| Meats / Carne                                                                                                     | <input type="radio"/> | <input type="radio"/> | <input type="radio"/> | <input type="radio"/> | <input type="radio"/> | <input type="radio"/> |
| Beans / Frijoles                                                                                                  | <input type="radio"/> | <input type="radio"/> | <input type="radio"/> | <input type="radio"/> | <input type="radio"/> | <input type="radio"/> |
| Rice / Arroz                                                                                                      | <input type="radio"/> | <input type="radio"/> | <input type="radio"/> | <input type="radio"/> | <input type="radio"/> | <input type="radio"/> |

12b. At present, how often does your child eat breakfast per week?

¿Cuántas días por semana come el desayuno?

- None
- < 1 day
- 1-2 days
- 3-5 days
- 6-7 days
- Unsure

13. What is your child's current eczema status?  
¿Ha tenido eccema?

- Current
- Outgrown since last visit
- Never had it
- Don't know

14. Do you currently use cream, lotion, or ointment containing steroids on your child's skin for eczema? (for example: hydrocortisone cream or triamcinolone cream)

Yes  
 No  
 Unsure

¿Ud. Usa una crema que tiene esteroides (como hidrocortisona) en el piel de...?

15. Does your child have hay fever or seasonal allergies?

Yes, he/she has it now  
 No  
 Unsure

¿Tiene alergias estacionales?

15b. Which season does your child have seasonal allergies? (select all that apply)

Spring  
 Summer  
 Autumn  
 Winter  
 Year round

Primavera  
Verano  
Otoño  
Invierno  
Todo el año

16. Does your child have pet allergies?

Yes  
 No  
 Don't Know

¿Tiene algunas alergias a animales o mascotas?

If YES, what type of pet allergy? (select all that apply)

Cat  
 Dog

If OTHER, specify:

\_\_\_\_\_  
(name of other type of pet that child is allergic to)

If OTHER, specify:

\_\_\_\_\_  
(name of other type of pet that child is allergic to)

### 17. Has your child been diagnosed by a doctor with any of the follow environmental allergies?

#### ¿Ha diagnosticado... con una alergia de...?

|                                       | Current               | Outgrown since last visit | Never                 | Don't know            |
|---------------------------------------|-----------------------|---------------------------|-----------------------|-----------------------|
| Polleen(tree, grass, ragweed) / polen | <input type="radio"/> | <input type="radio"/>     | <input type="radio"/> | <input type="radio"/> |
| Dustmite / Polvo                      | <input type="radio"/> | <input type="radio"/>     | <input type="radio"/> | <input type="radio"/> |
| Cockroach / Cucaracha                 | <input type="radio"/> | <input type="radio"/>     | <input type="radio"/> | <input type="radio"/> |
| Mold / Moho                           | <input type="radio"/> | <input type="radio"/>     | <input type="radio"/> | <input type="radio"/> |
| Other 1                               | <input type="radio"/> | <input type="radio"/>     | <input type="radio"/> | <input type="radio"/> |

Other 2

Other 3

Other allergy 1 specify \_\_\_\_\_

Other allergy 2 specify \_\_\_\_\_

Other allergy 3 specify \_\_\_\_\_

18. Has your child ever used anti-allergy medication?  
(ie Benadryl, Zyrtec, Claritin, Atarax, Dimetapp)

- Yes  
 No  
 Don't Know

¿En el último año, ha usado medicina anti alergia?

19. Has your child ever used medications for  
gastrointestinal upset?

- Yes  
 No  
 Don't Know

¿En el último año, ha usado medicina por el dolor  
de estómago?

if YES, which of the following medications did he/she  
take?

¿Qué tipo?

- Antacids (Mylants, Roloids, TUMS, Pepto-Bismol)  
 H2 Blockers  
 Proton Pump inhibitors (Aciphex, Prilosec,  
Preveacid, Nexium)  
 Prokinetic agents (Urecholine, Reglin,  
Erythromycin)  
 Unsure  
 Other

If Others, specify: \_\_\_\_\_

20. Does your child have any drug allergies?

¿Tiene alergias a algunas medicinas o drogas?

- Yes  
 No  
 Don't Know

If yes, specify the drug (use "," to separate): \_\_\_\_\_

If yes, specify the drug (use "," to separate): \_\_\_\_\_

21. Is your child allergic to insect stings?

¿Tiene alergias a algunos insectos?

¿Ha sido picado por una abeja o avispa?

- Yes  
 No  
 Don't know/Child has never been stung

22. Has your child ever had E.E. (Eosinophilic  
esophagitis)?

¿Tiene ... esofagitis eosinofílica?

- No  
 Yes, only when she/he was a baby, but outgrew by  
age  
 Yes, he/she has it now  
 Don't know

---

If outgrown, at what age did your child outgrow?

Year(s)

\_\_\_\_\_

(Years)

---

If outgrown, at what age did your child outgrow?

Months

\_\_\_\_\_

(Months)

---

If yes, was your child's EE diagnosed by a doctor?

¿Fue diagnosticado por un doctor?

- Yes  
 No  
 Don't know
- 

How old was your child when first diagnosed by a doctor?

Year(s)

¿Cuándo fue diagnosticado?

Años

\_\_\_\_\_

(Years / Años)

---

How old was your child when first diagnosed by a doctor?

Months

¿Cuándo fue diagnosticado?

Meses

\_\_\_\_\_

(months / Meses )

---

23. Has your child ever had GERD (Gastroesophageal Reflux Disease)?

¿Ha tenido reflujo de ácido?

- No  
 Yes, only when she/he was a baby, but outgrew  
 Yes, he/she has it now  
 Don't know
- 

If outgrown, at what age?

Year(s)

\_\_\_\_\_

(years)

---

If outgrown, at what age?

Months

\_\_\_\_\_

(Months)

---

If yes, was your child's GERD diagnosed by a doctor?

¿Fue diagnosticado por un doctor?

- Yes  
 No  
 Don't know
- 

How old was your child when first diagnosed by a doctor?

Year(s)

¿Cuándo fue diagnosticado?

Años

\_\_\_\_\_

(years)

---

How old was your child when first diagnosed by a doctor?

Months

¿Cuándo fue diagnosticado?

Meses

\_\_\_\_\_

(months / Meses )

---

24. What is your child's food allergy status (meaning any food)?

¿Ha tenido... alergias a algunas comidas?  
¿Ahora tiene?

- Current  
 Outgrown since last visit  
 Food was never introduced due to positive skin test or RAST  
 Never

### If NEVER skip to PEDIATRIC SLEEP QUESTIONNAIRE

24b. Allergy to Dairy products / Cheese / Milk?

Leche, queso, productos lactos

- Current  
 Outgrown since last visit  
 Food was never introduced due to positive skin test or RAST  
 Never

Allergy to Egg?

Huevos

- Current  
 Outgrown since last visit  
 Food was never introduced due to positive skin test or RAST  
 Never

Allergy to Peanuts?

Cacahuete/ maní (Incluyendo crema/mantequilla de maní)

- Current  
 Outgrown since last visit  
 Food was never introduced due to positive skin test or RAST  
 Never

Allergy to Tree Nuts

Nueces de árbol

- Current  
 Outgrown since last visit  
 Food was never introduced due to positive skin test or RAST  
 Never

Allergy to Fish?

Pescado

- Current  
 Outgrown since last visit  
 Food was never introduced due to positive skin test or RAST  
 Never

Allergy to Shellfish?

Mariscos

- Current  
 Outgrown since last visit  
 Food was never introduced due to positive skin test or RAST  
 Never

Allergy to Wheat?

Productos de trigo

- Current  
 Outgrown since last visit  
 Food was never introduced due to positive skin test or RAST  
 Never

Allergy to Soy/Tofu?

Soja/tofu

- Current  
 Outgrown since last visit  
 Food was never introduced due to positive skin test or RAST  
 Never

---

Allergy to Seeds?

Semillas

- Current  
 Outgrown since last visit  
 Food was never introduced due to positive skin test or RAST  
 Never
- 

Specify Other Food Allergy #1:

\_\_\_\_\_  
(name of other food #1 child is allergic to)

---

Other Food Allergy #1

- Current  
 Outgrown since last visit  
 Food was never introduced due to positive skin test or RAST  
 Never
- 

Specify Other Food Allergy #2:

\_\_\_\_\_  
(name of other food #2 child is allergic to)

---

Other Food Allergy #2

- Current  
 Outgrown since last visit  
 Food was never introduced due to positive skin test or RAST  
 Never
- 

Specify Other Food Allergy #3:

\_\_\_\_\_  
(name of other food #3 child is allergic to)

---

Other Food Allergy #3

- Current  
 Outgrown since last visit  
 Food was never introduced due to positive skin test or RAST  
 Never
- 

Specify Other Food Allergy #4:

\_\_\_\_\_  
(name of other food #4 child is allergic to)

---

Other Food Allergy #4

- Current  
 Outgrown since last visit  
 Food was never introduced due to positive skin test or RAST  
 Never
- 

Specify Other Food Allergy #5:

\_\_\_\_\_  
(name of other food #5 child is allergic to)

---

Other Food Allergy #5

- Current  
 Outgrown since last visit  
 Food was never introduced due to positive skin test or RAST  
 Never

Specify Other Food Allergy #6:

(name of other food #6 child is allergic to)

Other Food Allergy #6

- Current  
 Outgrown since last visit  
 Food was never introduced due to positive skin test or RAST  
 Never

25a. Has your child been breast fed since the last visit?

- Yes  
 No

¿Sido alimentado con leche materna...en el último año?

**Skip to question 26 if child has not been breast fed since the last visit**

25b. Since the last visit, has your child ever experienced allergic symptoms to any food that was passed exclusively through breast milk?

- Yes  
 No  
 Don't know

¿En el año pasado ha experimentado... sin toma alérgica a los alimentos pasados a través de la leche materna?

If yes, to which foods?

- Dairy products/Cheese/Milk  
 Egg  
 Peanuts  
 Tree Nuts  
 Fish  
 Shellfish  
 Wheat  
 Soy/Tofu  
 Seeds  
 Other

If other, list other foods:  
Other food #1

\_\_\_\_\_

If other, list other foods:  
Other food #2

\_\_\_\_\_

If other, list other foods:  
Other food #3

\_\_\_\_\_

If other, list other foods:  
Other food #4

\_\_\_\_\_

If other, list other foods:  
Other food #5

\_\_\_\_\_

If other, list other foods:  
Other food #6

\_\_\_\_\_

**26. Has your child experienced any of the following symptoms from ingestion since the last visit?**

**¿Ha experimentado su hijo alguno de los siguientes síntomas por ingestión en el último año?**

26a. Any mouth symptoms

- Yes  
 No  
 Don't know

Síntomas de boca

**26a. Specific symptoms of food allergy (through ingestion):**

**a. MOUTH (Boca)**

**Cow's Milk/Dairy Products/Cheese**

|                                               | Check box if yes         |
|-----------------------------------------------|--------------------------|
| Lips Itching/Tingling / Picazón en los labios | <input type="checkbox"/> |
| Lips Swelling / Labios hinchados              | <input type="checkbox"/> |
| Tongue Itching/Tingling / Picazón la lengua   | <input type="checkbox"/> |
| Tongue Swelling / Lengua hinchada             | <input type="checkbox"/> |

**26 a. Specific symptoms of food allergy (through ingestion):**

**a. MOUTH**

**Egg**

|                         | Check box if yes         |
|-------------------------|--------------------------|
| Lips Itching/Tingling   | <input type="checkbox"/> |
| Lips Swelling           | <input type="checkbox"/> |
| Tongue Itching/Tingling | <input type="checkbox"/> |
| Tongue Swelling         | <input type="checkbox"/> |

**26a. Specific symptoms of food allergy (through ingestion):**

**a. MOUTH**

**Peanut**

|                         | Check box if yes         |
|-------------------------|--------------------------|
| Lips Itching/Tinging    | <input type="checkbox"/> |
| Lips Swelling           | <input type="checkbox"/> |
| Tongue Itching/Tingling | <input type="checkbox"/> |
| Tongue Swelling         | <input type="checkbox"/> |



**26a. Specific symptoms of food allergy (through ingestion):****a. MOUTH****Tree Nuts**

|                         | Check box if yes         |
|-------------------------|--------------------------|
| Lips Itching/Tingling   | <input type="checkbox"/> |
| Lips Swelling           | <input type="checkbox"/> |
| Tongue Itching/Tingling | <input type="checkbox"/> |
| Tongue Swelling         | <input type="checkbox"/> |

**26a. Specific symptoms of food allergy (through ingestion):****a. MOUTH****Fish**

|                         | Check box if yes         |
|-------------------------|--------------------------|
| Lips Itching/Tingling   | <input type="checkbox"/> |
| Lips Swelling           | <input type="checkbox"/> |
| Tongue Itching/Tingling | <input type="checkbox"/> |
| Tongue Swelling         | <input type="checkbox"/> |

**26a. Specific symptoms of food allergy (through ingestion):****a. MOUTH****Shellfish**

|                         | Check box if yes         |
|-------------------------|--------------------------|
| Lips Itching/Tingling   | <input type="checkbox"/> |
| Lips Swelling           | <input type="checkbox"/> |
| Tongue Itching/Tingling | <input type="checkbox"/> |
| Tongue Swelling         | <input type="checkbox"/> |

**26. Specific symptoms of food allergy (through ingestion):****a. MOUTH****Wheat**

|                         | Check box if yes         |
|-------------------------|--------------------------|
| Lips Itching/Tingling   | <input type="checkbox"/> |
| Lips Swelling           | <input type="checkbox"/> |
| Tongue Itching/Tingling | <input type="checkbox"/> |
| Tongue Swelling         | <input type="checkbox"/> |

**26. Specific symptoms of food allergy (through ingestion):****a. MOUTH****Soy/Tofu**

|                       | Check box if yes         |
|-----------------------|--------------------------|
| Lips Itching/Tingling | <input type="checkbox"/> |
| Lips Swelling         | <input type="checkbox"/> |

Tongue Itching/Tingling

Tongue Swelling

**26. Specific symptoms of food allergy (through ingestion):**  
**a. MOUTH**  
**Seeds**

|                         | Check box if yes         |
|-------------------------|--------------------------|
| Lips Itching/Tingling   | <input type="checkbox"/> |
| Lips Swelling           | <input type="checkbox"/> |
| Tongue Itching/Tingling | <input type="checkbox"/> |
| Tongue Swelling         | <input type="checkbox"/> |

26a. Name of Other Food Allergy #1 \_\_\_\_\_

**26. Specific symptoms of food allergy (through ingestion):**  
**a. MOUTH**  
**Other Food Allergy #1**

|                         | Check box if yes         |
|-------------------------|--------------------------|
| Lips Itching/Tingling   | <input type="checkbox"/> |
| Lips Swelling           | <input type="checkbox"/> |
| Tongue Itching/Tingling | <input type="checkbox"/> |
| Tongue Swelling         | <input type="checkbox"/> |

26a. Name of Other Food Allergy #2 \_\_\_\_\_

**26. Specific symptoms of food allergy (through ingestion):**  
**a. MOUTH**  
**Other Food Allergy #2**

|                         | Check box if yes         |
|-------------------------|--------------------------|
| Lips Itching/Tingling   | <input type="checkbox"/> |
| Lips Swelling           | <input type="checkbox"/> |
| Tongue Itching/Tingling | <input type="checkbox"/> |
| Tongue Swelling         | <input type="checkbox"/> |

26a. Name of Other Food Allergy #3 \_\_\_\_\_

**26. Specific symptoms of food allergy (through ingestion):****a. MOUTH****Other Food Allergy #3**

|                         | Check box if yes      |
|-------------------------|-----------------------|
| Lips Itching/Tingling   | <input type="radio"/> |
| Lips Swelling           | <input type="radio"/> |
| Tongue Itching/Tingling | <input type="radio"/> |
| Tongue Swelling         | <input type="radio"/> |

26a. Name of Other Food Allergy #4

**26. Specific symptoms of food allergy (through ingestion):****a. MOUTH****Other Food Allergy #4**

|                         | Check box if yes         |
|-------------------------|--------------------------|
| Lips Itching/Tingling   | <input type="checkbox"/> |
| Lips Swelling           | <input type="checkbox"/> |
| Tongue Itching/Tingling | <input type="checkbox"/> |
| Tongue Swelling         | <input type="checkbox"/> |

26a. Name of Other Food Allergy #5

**26. Specific symptoms of food allergy (through ingestion):****a. MOUTH****Other Food Allergy #5**

|                         | Check box if yes         |
|-------------------------|--------------------------|
| Lips Itching/Tingling   | <input type="checkbox"/> |
| Lips Swelling           | <input type="checkbox"/> |
| Tongue Itching/Tingling | <input type="checkbox"/> |
| Tounge Swelling         | <input type="checkbox"/> |

26a. Name of Other Food Allergy #6

**26. Specific symptoms of food allergy (through ingestion):****a. MOUTH****Other Food Allergy #6**

|                       | Check box if yes      |
|-----------------------|-----------------------|
| Lips Itching/Tingling | <input type="radio"/> |

Lips Swelling

Tongue Itching/Tingling

Tongue Swelling

26 b/c. Eye or nose symptoms  Yes  
 No  
 Don't know

Síntomas de ojos/ nariz  Yes  
 No  
 Don't know

## 26. Specific symptoms of food allergy (through ingestion):

**b/c. EYE/NOSE**

### Cow's Milk/Dairy Products/Cheese

|                                      | Check box if yes         |
|--------------------------------------|--------------------------|
| Red/Watery/Itchy Eye / Ojo rojo/pica | <input type="checkbox"/> |
| Swollen Eye / Ojo hinchado           | <input type="checkbox"/> |
| Stuffy/Runny Nose / Congestión nasal | <input type="checkbox"/> |
| Sneezing / Estornudo                 | <input type="checkbox"/> |
| Itchy Nose / Picazón en la nariz     | <input type="checkbox"/> |

## 26. Specific symptoms of food allergy (through ingestion):

**b/c. EYE/NOSE**

### Egg

|                      | Check box if yes         |
|----------------------|--------------------------|
| Red/Watery/Itchy Eye | <input type="checkbox"/> |
| Swollen Eye          | <input type="checkbox"/> |
| Stuffy/Runny Nose    | <input type="checkbox"/> |
| Sneezing             | <input type="checkbox"/> |
| Itchy Nose           | <input type="checkbox"/> |

## 26. Specific symptoms of food allergy (through ingestion):

**b/c. EYE/NOSE**

### Peanut

|                      | Check box if yes         |
|----------------------|--------------------------|
| Red/Watery/Itchy Eye | <input type="checkbox"/> |
| Swollen Eye          | <input type="checkbox"/> |
| Stuffy/Runny Nose    | <input type="checkbox"/> |
| Sneezing             | <input type="checkbox"/> |
| Itchy Nose           | <input type="checkbox"/> |

**26. Specific symptoms of food allergy (through ingestion):****b/c. EYE/NOSE****Tree Nuts**

|                      | Check box if yes         |
|----------------------|--------------------------|
| Red/Watery/Itchy Eye | <input type="checkbox"/> |
| Swollen Eye          | <input type="checkbox"/> |
| Stuffy/Runny Nose    | <input type="checkbox"/> |
| Sneezing             | <input type="checkbox"/> |
| Itchy Nose           | <input type="checkbox"/> |

**26. Specific symptoms of food allergy (through ingestion):****b/c. EYE/NOSE****Fish**

|                      | Check box if yes         |
|----------------------|--------------------------|
| Red/Watery/Itchy Eye | <input type="checkbox"/> |
| Swollen Eye          | <input type="checkbox"/> |
| Stuffy/Runny Nose    | <input type="checkbox"/> |
| Sneezing             | <input type="checkbox"/> |
| Itchy Nose           | <input type="checkbox"/> |

**26. Specific symptoms of food allergy (through ingestion):****b/c. EYE/NOSE****Shellfish**

|                      | Check box if yes         |
|----------------------|--------------------------|
| Red/Watery/Itchy Eye | <input type="checkbox"/> |
| Swollen Eye          | <input type="checkbox"/> |
| Stuffy/Runny Nose    | <input type="checkbox"/> |
| Sneezing             | <input type="checkbox"/> |
| Itchy Nose           | <input type="checkbox"/> |

**26. Specific symptoms of food allergy (through ingestion):****b/c. EYE/NOSE****Wheat**

|                      | Check box if yes         |
|----------------------|--------------------------|
| Red/Watery/Itchy Eye | <input type="checkbox"/> |
| Swollen Eye          | <input type="checkbox"/> |
| Stuffy/Runny Nose    | <input type="checkbox"/> |
| Sneezing             | <input type="checkbox"/> |
| Itchy Nose           | <input type="checkbox"/> |

**26. Specific symptoms of food allergy (through ingestion):****b/c. EYE/NOSE****Soy/Tofu**

|                      | Check box if yes         |
|----------------------|--------------------------|
| Red/Watery/Itchy Eye | <input type="checkbox"/> |
| Swollen Eye          | <input type="checkbox"/> |
| Stuffy/Runny Nose    | <input type="checkbox"/> |
| Sneezing             | <input type="checkbox"/> |
| Itchy Nose           | <input type="checkbox"/> |

**26. Specific symptoms of food allergy (through ingestion):****b/c. EYE/NOSE****Seeds**

|                      | Check box if yes         |
|----------------------|--------------------------|
| Red/Watery/Itchy Eye | <input type="checkbox"/> |
| Swollen Eye          | <input type="checkbox"/> |
| Stuffy/Runny Nose    | <input type="checkbox"/> |
| Sneezing             | <input type="checkbox"/> |
| Itchy Nose           | <input type="checkbox"/> |

26b/c. Name of Other Food Allergy #1

\_\_\_\_\_

**26. Specific symptoms of food allergy (through ingestion):****b/c. EYE/NOSE****Other Food Allergy #1**

|                      | Check box if yes         |
|----------------------|--------------------------|
| Red/Watery/Itchy Eye | <input type="checkbox"/> |
| Swollen Eye          | <input type="checkbox"/> |
| Stuffy/Runny Nose    | <input type="checkbox"/> |
| Sneezing             | <input type="checkbox"/> |
| Itchy Nose           | <input type="checkbox"/> |

26b/c. Name of Other Food Allergy #2

\_\_\_\_\_

**26. Specific symptoms of food allergy (through ingestion):****b/c. EYE/NOSE****Other Food Allergy #2**

|                      | Check box if yes         |
|----------------------|--------------------------|
| Red/Watery/Itchy Eye | <input type="checkbox"/> |

|                   |                          |
|-------------------|--------------------------|
| Swollen Eye       | <input type="checkbox"/> |
| Stuffy/Runny Nose | <input type="checkbox"/> |
| Sneezing          | <input type="checkbox"/> |
| Itchy Nose        | <input type="checkbox"/> |

26b/c. Name of Other Food Allergy #3

---

### 26. Specific symptoms of food allergy (through ingestion):

**b/c. EYE/NOSE**

**Other Food Allergy #3**

|                      | Check box if yes      |
|----------------------|-----------------------|
| Red/Watery/Itchy Eye | <input type="radio"/> |
| Swollen Eye          | <input type="radio"/> |
| Stuffy/Runny Nose    | <input type="radio"/> |
| Sneezing             | <input type="radio"/> |
| Itchy Nose           | <input type="radio"/> |

26b/c. Name of Other Food Allergy #4

---

### 26. Specific symptoms of food allergy (through ingestion):

**b/c. EYE/NOSE**

**Other Food Allergy #4**

|                      | Check box if yes         |
|----------------------|--------------------------|
| Red/Watery/Itchy Eye | <input type="checkbox"/> |
| Swollen Eye          | <input type="checkbox"/> |
| Stuffy/Runny Nose    | <input type="checkbox"/> |
| Sneezing             | <input type="checkbox"/> |
| Itchy Nose           | <input type="checkbox"/> |

26b/c. Name of Other Food Allergy #5

---

### 26. Specific symptoms of food allergy (through ingestion):

**b/c. EYE/NOSE**

**Other Food Allergy #5**

|                      | Check box if yes      |
|----------------------|-----------------------|
| Red/Watery/Itchy Eye | <input type="radio"/> |
| Swollen Eye          | <input type="radio"/> |
| Stuffy/Runny Nose    | <input type="radio"/> |

Sneezing

Itchy Nose

26b/c. Name of Other Food Allergy #6 \_\_\_\_\_

**26. Specific symptoms of food allergy (through ingestion):**

**b/c. EYE/NOSE**

**Other Food Allergy #6**

|                      | Check box if yes         |
|----------------------|--------------------------|
| Red/Watery/Itchy Eye | <input type="checkbox"/> |
| Swollen Eye          | <input type="checkbox"/> |
| Stuffy/Runny Nose    | <input type="checkbox"/> |
| Sneezing             | <input type="checkbox"/> |
| Itchy Nose           | <input type="checkbox"/> |

26d. Throat symptoms  Yes  
 No  
 Don't know

Síntomas de la garganta

**26. Specific symptoms of food allergy (through ingestion):**

**d. THROAT**

**Cow's Milk/Dairy Products/Cheese**

|                                                                            | Check box if yes         |
|----------------------------------------------------------------------------|--------------------------|
| Itching and/or tightness in the throat / Picazón u opresión en la garganta | <input type="checkbox"/> |
| Hoarseness/change of voice / Voz ronco                                     | <input type="checkbox"/> |
| Choking/Difficulty Swallowing / Dificultad para deglutir                   | <input type="checkbox"/> |
| Throat Clearing / Limpiado de la garganta                                  | <input type="checkbox"/> |

**26. Specific symptoms of food allergy (through ingestion):**

**d. THROAT**

**Egg**

|                                        | Check box if yes      |
|----------------------------------------|-----------------------|
| Itching and/or tightness in the throat | <input type="radio"/> |
| Hoarseness/change of voice             | <input type="radio"/> |
| Choking/Difficulty Swallowing          | <input type="radio"/> |



Throat Clearing

**26. Specific symptoms of food allergy (through ingestion):****d. THROAT****Peanut**

|                                        | Check box if yes         |
|----------------------------------------|--------------------------|
| Itching and/or tightness in the throat | <input type="checkbox"/> |
| Hoarseness/change of voice             | <input type="checkbox"/> |
| Choking/Difficulty swallowing          | <input type="checkbox"/> |
| Throat Clearing                        | <input type="checkbox"/> |

**26. Specific symptoms of food allergy (through ingestion):****d. THROAT****Tree Nuts**

|                                        | Check box if yes         |
|----------------------------------------|--------------------------|
| Itching and/or tightness in the throat | <input type="checkbox"/> |
| Hoarseness/change of voice             | <input type="checkbox"/> |
| Choking/Difficulty Swallowing          | <input type="checkbox"/> |
| Throat Clearing                        | <input type="checkbox"/> |

**26. Specific symptoms of food allergy (through ingestion):****d. THROAT****Fish**

|                                        | Check box if yes         |
|----------------------------------------|--------------------------|
| Itching and/or tightness in the throat | <input type="checkbox"/> |
| Hoarseness/change of voice             | <input type="checkbox"/> |
| Choking/Difficulty Swallowing          | <input type="checkbox"/> |
| Throat Clearing                        | <input type="checkbox"/> |

**26. Specific symptoms of food allergy (through ingestion):****d. THROAT****Shellfish**

|                                        | Check box if yes         |
|----------------------------------------|--------------------------|
| Itching and/or tightness in the throat | <input type="checkbox"/> |
| Hoarseness/change of voice             | <input type="checkbox"/> |
| Choking/Difficulty Swallowing          | <input type="checkbox"/> |
| Throat Clearing                        | <input type="checkbox"/> |

**26. Specific symptoms of food allergy (through ingestion):****d. THROAT****Wheat**

|                                        | Check box if yes         |
|----------------------------------------|--------------------------|
| Itching and/or tightness in the throat | <input type="checkbox"/> |
| Hoarseness/change of voice             | <input type="checkbox"/> |
| Choking/Difficulty Swallowing          | <input type="checkbox"/> |
| Throat Clearing                        | <input type="checkbox"/> |

**26. Specific symptoms of food allergy (through ingestion):****d. THROAT****Soy/Tofu**

|                                        | Check box if yes         |
|----------------------------------------|--------------------------|
| Itching and/or tightness in the throat | <input type="checkbox"/> |
| Hoarseness/change of voice             | <input type="checkbox"/> |
| Choking/Difficulty Swallowing          | <input type="checkbox"/> |
| Throat Clearing                        | <input type="checkbox"/> |

**26. Specific symptoms of food allergy (through ingestion):****d. THROAT****Seeds**

|                                        | Check box if yes         |
|----------------------------------------|--------------------------|
| Itching and/or tightness in the throat | <input type="checkbox"/> |
| Hoarseness/change of voice             | <input type="checkbox"/> |
| Choking/Difficulty Swallowing          | <input type="checkbox"/> |
| Throat Clearing                        | <input type="checkbox"/> |

26d. Name of Other Food Allergy #1 \_\_\_\_\_

**26. Specific symptoms of food allergy (through ingestion):****d. THROAT****Other Food Allergy #1**

|                                        | Check box if yes         |
|----------------------------------------|--------------------------|
| Itching and/or tightness in the throat | <input type="checkbox"/> |
| Hoarseness/change of voice             | <input type="checkbox"/> |
| Choking/Difficulty Swallowing          | <input type="checkbox"/> |
| Throat Clearing                        | <input type="checkbox"/> |

26d. Name of Other Food Allergy #2 \_\_\_\_\_

**26. Specific symptoms of food allergy (through ingestion):**  
**d. THROAT**  
**Other Food Allergy #2**

|                                        | Check box if yes      |
|----------------------------------------|-----------------------|
| Itching and/or tightness in the throat | <input type="radio"/> |
| Hoarseness/change of voice             | <input type="radio"/> |
| Choking/Difficulty Swallowing          | <input type="radio"/> |
| Throat Clearing                        | <input type="radio"/> |

26d. Name of Other Food Allergy #3 \_\_\_\_\_

**26. Specific symptoms of food allergy (through ingestion):**  
**d. THROAT**  
**Other Food Allergy #3**

|                                        | Check box if yes      |
|----------------------------------------|-----------------------|
| Itching and/or tightness in the throat | <input type="radio"/> |
| Hoarseness/change of voice             | <input type="radio"/> |
| Choking/Difficulty Swallowing          | <input type="radio"/> |
| Throat Clearing                        | <input type="radio"/> |

26d. Name of Other Food Allergy #4 \_\_\_\_\_

**26. Specific symptoms of food allergy (through ingestion):**  
**d. THROAT**  
**Other Food Allergy #4**

|                                        | Check box if yes         |
|----------------------------------------|--------------------------|
| Itching and/or tightness in the throat | <input type="checkbox"/> |
| Hoarseness/change of voice             | <input type="checkbox"/> |
| Choking/Difficulty Swallowing          | <input type="checkbox"/> |
| Throat Clearing                        | <input type="checkbox"/> |

26d. Name of Other Food Allergy #5 \_\_\_\_\_

**26. Specific symptoms of food allergy (through ingestion):****d. THROAT****Other Food Allergy #5**

|                                        | Check box if yes         |
|----------------------------------------|--------------------------|
| Itching and/or tightness in the throat | <input type="checkbox"/> |
| Hoarseness/change of voice             | <input type="checkbox"/> |
| Choking/Difficulty Swallowing          | <input type="checkbox"/> |
| Throat Clearing                        | <input type="checkbox"/> |

26d. Name of Other Food Allergy #6 \_\_\_\_\_

**26. Specific symptoms of food allergy (through ingestion):****d. THROAT****Other Food Allergy #6**

|                                        | Check box if yes         |
|----------------------------------------|--------------------------|
| Itching and/or tightness in the throat | <input type="checkbox"/> |
| Hoarseness/change of voice             | <input type="checkbox"/> |
| Choking/Difficulty Swallowing          | <input type="checkbox"/> |
| Throat Clearing                        | <input type="checkbox"/> |

26e. Skin symptoms

- Yes  
 No  
 Don't know

Síntomas de piel

**26. Specific symptoms of food allergy (through ingestion):****e. SKIN****Cow's Milk/Dairy Products/Cheese**

|                                                                               | Check box if yes         |
|-------------------------------------------------------------------------------|--------------------------|
| Itching / Pica                                                                | <input type="checkbox"/> |
| Hives / Urticaria                                                             | <input type="checkbox"/> |
| Swelling of the face and/or extremities / Hinchazón de la cara o extremidades | <input type="checkbox"/> |
| Redness of the skin / Piel rojo                                               | <input type="checkbox"/> |

**26. Specific symptoms of food allergy (through ingestion):****e. SKIN****Egg**

|                                         | Check box if yes         |
|-----------------------------------------|--------------------------|
| Itching                                 | <input type="checkbox"/> |
| Hives                                   | <input type="checkbox"/> |
| Swelling of the face and/or extremities | <input type="checkbox"/> |
| Redness of the skin                     | <input type="checkbox"/> |

**26. Specific symptoms of food allergy (through ingestion):****e. SKIN****Peanut**

|                                         | Check box if yes         |
|-----------------------------------------|--------------------------|
| Itching                                 | <input type="checkbox"/> |
| Hives                                   | <input type="checkbox"/> |
| Swelling of the face and/or extremities | <input type="checkbox"/> |
| Redness of the skin                     | <input type="checkbox"/> |

**26. Specific symptoms of food allergy (through ingestion):****e. SKIN****Treenut**

|                                         | Check box if yes         |
|-----------------------------------------|--------------------------|
| Itching                                 | <input type="checkbox"/> |
| Hives                                   | <input type="checkbox"/> |
| Swelling of the face and/or extremities | <input type="checkbox"/> |
| Redness of the skin                     | <input type="checkbox"/> |

**26. Specific symptoms of food allergy (through ingestion):****e. SKIN****Fish**

|                                         | Check box if yes         |
|-----------------------------------------|--------------------------|
| Itching                                 | <input type="checkbox"/> |
| Hives                                   | <input type="checkbox"/> |
| Swelling of the face and/or extremities | <input type="checkbox"/> |
| Redness of the skin                     | <input type="checkbox"/> |

**26. Specific symptoms of food allergy (through ingestion):****e. SKIN****Shellfish**

|                                         | Check box if yes         |
|-----------------------------------------|--------------------------|
| Itching                                 | <input type="checkbox"/> |
| Hives                                   | <input type="checkbox"/> |
| Swelling of the face and/or extremities | <input type="checkbox"/> |
| Redness of the skin                     | <input type="checkbox"/> |

**26. Specific symptoms of food allergy (through ingestion):****e. SKIN****Wheat**

|                                         | Check box if yes         |
|-----------------------------------------|--------------------------|
| Itching                                 | <input type="checkbox"/> |
| Hives                                   | <input type="checkbox"/> |
| Swelling of the face and/or extremities | <input type="checkbox"/> |
| Redness of the skin                     | <input type="checkbox"/> |

**26. Specific symptoms of food allergy (through ingestion):****e. SKIN****Soy/Tofu**

|                                         | Check box if yes         |
|-----------------------------------------|--------------------------|
| Itching                                 | <input type="checkbox"/> |
| Hives                                   | <input type="checkbox"/> |
| Swelling of the face and/or extremities | <input type="checkbox"/> |
| Redness of the skin                     | <input type="checkbox"/> |

**26. Specific symptoms of food allergy (through ingestion):****e. SKIN****Seeds**

|                                         | Check box if yes         |
|-----------------------------------------|--------------------------|
| Itching                                 | <input type="checkbox"/> |
| Hives                                   | <input type="checkbox"/> |
| Swelling of the face and/or extremities | <input type="checkbox"/> |
| Redness of the skin                     | <input type="checkbox"/> |

26e. Name of Other Food Allergy #1

---

**26. Specific symptoms of food allergy (through ingestion):****e. SKIN****Other Food Allergy #1**

|                                         | Check box if yes         |
|-----------------------------------------|--------------------------|
| Itching                                 | <input type="checkbox"/> |
| Hives                                   | <input type="checkbox"/> |
| Swelling of the face and/or extremities | <input type="checkbox"/> |
| Redness of the skin                     | <input type="checkbox"/> |

26e. Name of Other Food Allergy #2

---

**26. Specific symptoms of food allergy (through ingestion):****e. SKIN****Other Food Allergy #2**

|                                         | Check box if yes         |
|-----------------------------------------|--------------------------|
| Itching                                 | <input type="checkbox"/> |
| Hives                                   | <input type="checkbox"/> |
| Swelling of the face and/or extremities | <input type="checkbox"/> |
| Redness of the skin                     | <input type="checkbox"/> |

26e. Name of Other Food Allergy #3

---

**26. Specific symptoms of food allergy (through ingestion):****e. SKIN****Other Food Allergy #3**

|                                         | Check box if yes         |
|-----------------------------------------|--------------------------|
| Itching                                 | <input type="checkbox"/> |
| Hives                                   | <input type="checkbox"/> |
| Swelling of the face and/or extremities | <input type="checkbox"/> |
| Redness of the skin                     | <input type="checkbox"/> |

26e. Name of Other Food Allergy #4

---

**26. Specific symptoms of food allergy (through ingestion):****e. SKIN****Other Food Allergy #4**

|                                         | Check box if yes         |
|-----------------------------------------|--------------------------|
| Itching                                 | <input type="checkbox"/> |
| Hives                                   | <input type="checkbox"/> |
| Swelling of the face and/or extremities | <input type="checkbox"/> |
| Redness of the skin                     | <input type="checkbox"/> |

26e. Name of Other Food Allergy #5 \_\_\_\_\_

**26. Specific symptoms of food allergy (through ingestion):****e. SKIN****Other Food Allergy #5**

|                                         | Check box if yes         |
|-----------------------------------------|--------------------------|
| Itching                                 | <input type="checkbox"/> |
| Hives                                   | <input type="checkbox"/> |
| Swelling of the face and/or extremities | <input type="checkbox"/> |
| Redness of the skin                     | <input type="checkbox"/> |

26e. Name of Other Food Allergy #6 \_\_\_\_\_

**26. Specific symptoms of food allergy (through ingestion):****e. SKIN****Other Food Allergy #6**

|                                         | Check box if yes         |
|-----------------------------------------|--------------------------|
| Itching                                 | <input type="checkbox"/> |
| Hives                                   | <input type="checkbox"/> |
| Swelling of the face and/or extremities | <input type="checkbox"/> |
| Redness of the skin                     | <input type="checkbox"/> |

26f. Lung Symptoms

- Yes  
 No  
 Don't know

Síntomas de Pulmón



**26. Specific symptoms of food allergy (through ingestion):****f. LUNG****Cow's Milk/Dairy Products/Cheese**

|                                        | Check box if yes         |
|----------------------------------------|--------------------------|
| Shortness of breath / Falta de aliento | <input type="checkbox"/> |
| Repetitive coughing / Tos repetitiva   | <input type="checkbox"/> |
| Wheezing / Aliento ruidoso             | <input type="checkbox"/> |
| Chest Tightness/Opresión en el pecho   | <input type="checkbox"/> |

**26. Specific symptoms of food allergy (through ingestion):****f. LUNG****Egg**

|                     | Check box if yes         |
|---------------------|--------------------------|
| Shortness of breath | <input type="checkbox"/> |
| Repetitive coughing | <input type="checkbox"/> |
| Wheezing            | <input type="checkbox"/> |
| Chest Tightness     | <input type="checkbox"/> |

**26. Specific symptoms of food allergy (through ingestion):****f. LUNG****Peanut**

|                     | Check box if yes         |
|---------------------|--------------------------|
| Shortness of breath | <input type="checkbox"/> |
| Repetitive coughing | <input type="checkbox"/> |
| Wheezing            | <input type="checkbox"/> |
| Chest Tightness     | <input type="checkbox"/> |

**26. Specific symptoms of food allergy (through ingestion):****f. LUNG****Treenut**

|                     | Check box if yes         |
|---------------------|--------------------------|
| Shortness of Breath | <input type="checkbox"/> |
| Repetitive Coughing | <input type="checkbox"/> |
| Wheezing            | <input type="checkbox"/> |
| Chest Tightness     | <input type="checkbox"/> |

**26. Specific symptoms of food allergy (through ingestion):****f. LUNG****Fish**

|                     | Check box if yes         |
|---------------------|--------------------------|
| Shortness of breath | <input type="checkbox"/> |
| Repetitive coughing | <input type="checkbox"/> |
| Wheezing            | <input type="checkbox"/> |
| Chest Tightness     | <input type="checkbox"/> |

**26. Specific symptoms of food allergy (through ingestion):****f. LUNG****Shellfish**

|                     | Check box if yes         |
|---------------------|--------------------------|
| Shortness of breath | <input type="checkbox"/> |
| Repetitive coughing | <input type="checkbox"/> |
| Wheezing            | <input type="checkbox"/> |
| Chest Tightness     | <input type="checkbox"/> |

**26. Specific symptoms of food allergy (through ingestion):****f. LUNG****Wheat**

|                     | Check box if yes         |
|---------------------|--------------------------|
| Shortness of breath | <input type="checkbox"/> |
| Repetitive coughing | <input type="checkbox"/> |
| Wheezing            | <input type="checkbox"/> |
| Chest Tightness     | <input type="checkbox"/> |

**26. Specific symptoms of food allergy (through ingestion):****f. LUNG****Soy/Tofu**

|                     | Check box if yes         |
|---------------------|--------------------------|
| Shortness of breath | <input type="checkbox"/> |
| Repetitive coughing | <input type="checkbox"/> |
| Wheezing            | <input type="checkbox"/> |
| Chest Tightness     | <input type="checkbox"/> |

**26. Specific symptoms of food allergy (through ingestion):****f. LUNG****Seeds**

|                     | Check box if yes         |
|---------------------|--------------------------|
| Shortness of breath | <input type="checkbox"/> |
| Repetitive coughing | <input type="checkbox"/> |

Wheezing

Chest Tightness

26f. Name of Other Food Allergy #1 \_\_\_\_\_

**26. Specific symptoms of food allergy (through ingestion):**

**f. LUNG**

**Other Food Allergy #1**

|                     | Check box if yes         |
|---------------------|--------------------------|
| Shortness of breath | <input type="checkbox"/> |
| Repetitive coughing | <input type="checkbox"/> |
| Wheezing            | <input type="checkbox"/> |
| Chest Tightness     | <input type="checkbox"/> |

26f. Name of Other Food Allergy #2 \_\_\_\_\_

**26. Specific symptoms of food allergy (through ingestion):**

**f. LUNG**

**Other Food Allergy #2**

|                     | Check box if yes         |
|---------------------|--------------------------|
| Shortness of breath | <input type="checkbox"/> |
| Repetitive coughing | <input type="checkbox"/> |
| Wheezing            | <input type="checkbox"/> |
| Chest Tightness     | <input type="checkbox"/> |

26f. Name of Other Food Allergy #3 \_\_\_\_\_

**26. Specific symptoms of food allergy (through ingestion):**

**f. LUNG**

**Other Food Allergy #3**

|                     | Check box if yes         |
|---------------------|--------------------------|
| Shortness of breath | <input type="checkbox"/> |
| Repetitive coughing | <input type="checkbox"/> |
| Wheezing            | <input type="checkbox"/> |
| Chest Tightness     | <input type="checkbox"/> |

26f. Name of Other Food Allergy #4 \_\_\_\_\_

**26. Specific symptoms of food allergy (through ingestion):****f. LUNG****Other Food Allergy #4**

|                     | Check box if yes         |
|---------------------|--------------------------|
| Shortness of breath | <input type="checkbox"/> |
| Repetitive coughing | <input type="checkbox"/> |
| Wheezing            | <input type="checkbox"/> |
| Chest Tightness     | <input type="checkbox"/> |

26f. Name of Other Food Allergy #5

**26. Specific symptoms of food allergy (through ingestion):****f. LUNG****Other Food Allergy #5**

|                     | Check box if yes         |
|---------------------|--------------------------|
| Shortness of breath | <input type="checkbox"/> |
| Repetitive coughing | <input type="checkbox"/> |
| Wheezing            | <input type="checkbox"/> |
| Chest Tightness     | <input type="checkbox"/> |

26f. Name of Other Food Allergy #6

**34. Specific symptoms of food allergy (through ingestion):****f. LUNG****Other Food Allergy #6**

|                     | Check box if yes         |
|---------------------|--------------------------|
| Shortness of breath | <input type="checkbox"/> |
| Repetitive coughing | <input type="checkbox"/> |
| Wheezing            | <input type="checkbox"/> |
| Chest Tightness     | <input type="checkbox"/> |

26g. Gut symptoms

- Yes  
 No  
 Don't know

Síntomas de tripa / intestino

**26. Specific symptoms of food allergy (through ingestion):****g. GUT****Cow's Milk/Dairy Products/Cheese**

Check box if yes

|                                                        |                          |
|--------------------------------------------------------|--------------------------|
| Stomach cramps/pain / Dolor de estómago                | <input type="checkbox"/> |
| Nausea / Náusea                                        | <input type="checkbox"/> |
| Vomiting / Vómito                                      | <input type="checkbox"/> |
| Diarrhea / Diarrea                                     | <input type="checkbox"/> |
| Bloating (swelling, gassy feeling) / Estómago hinchado | <input type="checkbox"/> |

## 26. Specific symptoms of food allergy (through ingestion):

### g. GUT

#### Egg

|                                    | Check box if yes         |
|------------------------------------|--------------------------|
| Stomach cramps/pain                | <input type="checkbox"/> |
| Nausea                             | <input type="checkbox"/> |
| Vomiting                           | <input type="checkbox"/> |
| Diarrhea                           | <input type="checkbox"/> |
| Bloating (swelling, gassy feeling) | <input type="checkbox"/> |

## 26. Specific symptoms of food allergy (through ingestion):

### g. GUT

#### Peanut

|                                    | Check box if yes         |
|------------------------------------|--------------------------|
| Stomach cramps/pain                | <input type="checkbox"/> |
| Nausea                             | <input type="checkbox"/> |
| Vomiting                           | <input type="checkbox"/> |
| Diarrhea                           | <input type="checkbox"/> |
| Bloating (swelling, gassy feeling) | <input type="checkbox"/> |

## 26. Specific symptoms of food allergy (through ingestion):

### g. GUT

#### Tree Nuts

|                                    | Check box if yes         |
|------------------------------------|--------------------------|
| Stomach cramps/pain                | <input type="checkbox"/> |
| Nausea                             | <input type="checkbox"/> |
| Vomiting                           | <input type="checkbox"/> |
| Diarrhea                           | <input type="checkbox"/> |
| Bloating (swelling, gassy feeling) | <input type="checkbox"/> |

**26. Specific symptoms of food allergy (through ingestion):****g. GUT****Fish**

|                                    | Check box if yes         |
|------------------------------------|--------------------------|
| Stomach cramps/pain                | <input type="checkbox"/> |
| Nausea                             | <input type="checkbox"/> |
| Vomiting                           | <input type="checkbox"/> |
| Diarrhea                           | <input type="checkbox"/> |
| Bloating (swelling, gassy feeling) | <input type="checkbox"/> |

**26. Specific symptoms of food allergy (through ingestion):****g. GUT****Shellfish**

|                                    | Check box if yes         |
|------------------------------------|--------------------------|
| Stomach cramps/pain                | <input type="checkbox"/> |
| Nausea                             | <input type="checkbox"/> |
| Vomiting                           | <input type="checkbox"/> |
| Diarrhea                           | <input type="checkbox"/> |
| Bloating (swelling, gassy feeling) | <input type="checkbox"/> |

**26. Specific symptoms of food allergy (through ingestion):****g. GUT****Wheat**

|                                    | Check box if yes         |
|------------------------------------|--------------------------|
| Stomach cramps/pain                | <input type="checkbox"/> |
| Nausea                             | <input type="checkbox"/> |
| Vomiting                           | <input type="checkbox"/> |
| Diarrhea                           | <input type="checkbox"/> |
| Bloating (swelling, gassy feeling) | <input type="checkbox"/> |

**26. Specific symptoms of food allergy (through ingestion):****g. GUT****Soy/Tofu**

|                                    | Check box if yes         |
|------------------------------------|--------------------------|
| Stomach cramps/pain                | <input type="checkbox"/> |
| Nausea                             | <input type="checkbox"/> |
| Vomiting                           | <input type="checkbox"/> |
| Diarrhea                           | <input type="checkbox"/> |
| Bloating (swelling, gassy feeling) | <input type="checkbox"/> |

**26. Specific symptoms of food allergy (through ingestion):****g. GUT****Seeds**

|                                    | Check box if yes         |
|------------------------------------|--------------------------|
| Stomach cramps/pain                | <input type="checkbox"/> |
| Nausea                             | <input type="checkbox"/> |
| Vomiting                           | <input type="checkbox"/> |
| Diarrhea                           | <input type="checkbox"/> |
| Bloating (swelling, gassy feeling) | <input type="checkbox"/> |

26g. Name of Other Food Allergy #1

---

**26. Specific symptoms of food allergy (through ingestion):****g. GUT****Other Food Allergy #1**

|                                    | Check box if yes         |
|------------------------------------|--------------------------|
| Stomach cramps/pain                | <input type="checkbox"/> |
| Nausea                             | <input type="checkbox"/> |
| Vomiting                           | <input type="checkbox"/> |
| Diarrhea                           | <input type="checkbox"/> |
| Bloating (swelling, gassy feeling) | <input type="checkbox"/> |

26g. Name of Other Food Allergy #2

---

**26. Specific symptoms of food allergy (through ingestion):****g. GUT****Other Food Allergy #2**

|                                    | Check box if yes         |
|------------------------------------|--------------------------|
| Stomach cramps/pain                | <input type="checkbox"/> |
| Nausea                             | <input type="checkbox"/> |
| Vomiting                           | <input type="checkbox"/> |
| Diarrhea                           | <input type="checkbox"/> |
| Bloating (swelling, gassy feeling) | <input type="checkbox"/> |

26g. Name of Other Food Allergy #3

---

**26. Specific symptoms of food allergy (through ingestion):****g. GUT****Other Food Allergy #3**

|                                    | Check box if yes         |
|------------------------------------|--------------------------|
| Stomach cramps/pain                | <input type="checkbox"/> |
| Nausea                             | <input type="checkbox"/> |
| Vomiting                           | <input type="checkbox"/> |
| Diarrhea                           | <input type="checkbox"/> |
| Bloating (swelling, gassy feeling) | <input type="checkbox"/> |

26g. Name of Other Food Allergy #4

---

**26. Specific symptoms of food allergy (through ingestion):****g. GUT****Other Food Allergy #4**

|                                    | Check box if yes         |
|------------------------------------|--------------------------|
| Stomach cramps/pain                | <input type="checkbox"/> |
| Nausea                             | <input type="checkbox"/> |
| Vomiting                           | <input type="checkbox"/> |
| Diarrhea                           | <input type="checkbox"/> |
| Bloating (swelling, gassy feeling) | <input type="checkbox"/> |

26g. Name of Other Food Allergy #5

---

**26. Specific symptoms of food allergy (through ingestion):****g. GUT****Other Food Allergy #5**

|                                    | Check box if yes         |
|------------------------------------|--------------------------|
| Stomach cramps/pain                | <input type="checkbox"/> |
| Nausea                             | <input type="checkbox"/> |
| Vomiting                           | <input type="checkbox"/> |
| Diarrhea                           | <input type="checkbox"/> |
| Bloating (swelling, gassy feeling) | <input type="checkbox"/> |

26g. Name of Other Food Allergy #6

---



**26. Specific symptoms of food allergy (through ingestion):****g. GUT****Other Food Allergy #6**

|                                    | Check box if yes         |
|------------------------------------|--------------------------|
| Stomach cramps/pain                | <input type="checkbox"/> |
| Nausea                             | <input type="checkbox"/> |
| Vomiting                           | <input type="checkbox"/> |
| Diarrhea                           | <input type="checkbox"/> |
| Bloating (swelling, gassy feeling) | <input type="checkbox"/> |

26h. Cardiovascular symptoms

 Yes

Síntomas de cardiovascular

 No Don't know**26. Specific symptoms of food allergy (through ingestion):****h. CARDIOVACULAR****Cow's Milk/Dairy Products/Cheese**

|                                        | Check box if yes         |
|----------------------------------------|--------------------------|
| Pale or turn blue / Piel pálida o azul | <input type="checkbox"/> |
| Dizzy/Light-headed / Marceo            | <input type="checkbox"/> |
| Passing out/Fainting / Desmogo         | <input type="checkbox"/> |

**26. Specific symptoms of food allergy (through ingestion):****h. CARDIOVACULAR****Egg**

|                      | Check box if yes         |
|----------------------|--------------------------|
| Pale or turn blue    | <input type="checkbox"/> |
| Dizzy/Light-headed   | <input type="checkbox"/> |
| Passing out/Fainting | <input type="checkbox"/> |

**26. Specific symptoms of food allergy (through ingestion):****h. CARDIOVACULAR****Peanut**

|                      | Check box if yes         |
|----------------------|--------------------------|
| Pale or turn blue    | <input type="checkbox"/> |
| Dizzy/Light-headed   | <input type="checkbox"/> |
| Passing out/Fainting | <input type="checkbox"/> |

**26. Specific symptoms of food allergy (through ingestion):****h. CARDIOVACULAR****Treenut**

|                      | Check box if yes         |
|----------------------|--------------------------|
| Pale or turn blue    | <input type="checkbox"/> |
| Dizzy/Light-headed   | <input type="checkbox"/> |
| Passing out/Fainting | <input type="checkbox"/> |

**26. Specific symptoms of food allergy (through ingestion):****h. CARDIOVACULAR****Fish**

|                      | Check box if yes         |
|----------------------|--------------------------|
| Pale or turn blue    | <input type="checkbox"/> |
| Dizzy/Light-headed   | <input type="checkbox"/> |
| Passing out/Fainting | <input type="checkbox"/> |

**26. Specific symptoms of food allergy (through ingestion):****h. CARDIOVACULAR****Shellfish**

|                      | Check box if yes         |
|----------------------|--------------------------|
| Pale or turn blue    | <input type="checkbox"/> |
| Dizzy/Light-headed   | <input type="checkbox"/> |
| Passing out/Fainting | <input type="checkbox"/> |

**26. Specific symptoms of food allergy (through ingestion):****h. CARDIOVACULAR****Wheat**

|                      | Check box if yes         |
|----------------------|--------------------------|
| Pale or turn blue    | <input type="checkbox"/> |
| Dizzy/Light-headed   | <input type="checkbox"/> |
| Passing out/Fainting | <input type="checkbox"/> |

**26. Specific symptoms of food allergy (through ingestion):****h. CARDIOVACULAR****Soy/Tofu**

|                      | Check box if yes         |
|----------------------|--------------------------|
| Pale or turn blue    | <input type="checkbox"/> |
| Dizzy/Light-headed   | <input type="checkbox"/> |
| Passing out/Fainting | <input type="checkbox"/> |

**26. Specific symptoms of food allergy (through ingestion):****h. CARDIOVACULAR****Seeds**

|                      | Check box if yes         |
|----------------------|--------------------------|
| Pale or turn blue    | <input type="checkbox"/> |
| Dizzy/Light-headed   | <input type="checkbox"/> |
| Passing out/Fainting | <input type="checkbox"/> |

26h. Name of Other Food Allergy #1 \_\_\_\_\_

**26. Specific symptoms of food allergy (through ingestion):****h. CARDIOVACULAR****Other Food Allergy #1**

|                      | Check box if yes         |
|----------------------|--------------------------|
| Pale or turn blue    | <input type="checkbox"/> |
| Dizzy/Light-headed   | <input type="checkbox"/> |
| Passing out/Fainting | <input type="checkbox"/> |

26h. Name of Other Food Allergy #2 \_\_\_\_\_

**26. Specific symptoms of food allergy (through ingestion):****h. CARDIOVACULAR****Other Food Allergy #2**

|                      | Check box if yes         |
|----------------------|--------------------------|
| Pale or turn blue    | <input type="checkbox"/> |
| Dizzy/Light-headed   | <input type="checkbox"/> |
| Passing out/Fainting | <input type="checkbox"/> |

26h. Name of Other Food Allergy #3 \_\_\_\_\_

**26. Specific symptoms of food allergy (through ingestion):****h. CARDIOVACULAR****Other Food Allergy #3**

|                      | Check box if yes         |
|----------------------|--------------------------|
| Pale or turn blue    | <input type="checkbox"/> |
| Dizzy/Light-headed   | <input type="checkbox"/> |
| Passing out/Fainting | <input type="checkbox"/> |

26h. Name of Other Food Allergy #4 \_\_\_\_\_

**26. Specific symptoms of food allergy (through ingestion):****h. CARDIOVACULAR****Other Food Allergy #4**

|                      | Check box if yes         |
|----------------------|--------------------------|
| Pale or turn blue    | <input type="checkbox"/> |
| Dizzy/Light-headed   | <input type="checkbox"/> |
| Passing out/Fainting | <input type="checkbox"/> |

26h. Name of Other Food Allergy #5 \_\_\_\_\_

**26. Specific symptoms of food allergy (through ingestion):****h. CARDIOVACULAR****Other Food Allergy #5**

|                      | Check box if yes         |
|----------------------|--------------------------|
| Pale or turn blue    | <input type="checkbox"/> |
| Dizzy/Light-headed   | <input type="checkbox"/> |
| Passing out/Fainting | <input type="checkbox"/> |

26h. Name of Other Food Allergy #6 \_\_\_\_\_

**26. Specific symptoms of food allergy (through ingestion):****h. CARDIOVACULAR****Other Food Allergy #6**

|                      | Check box if yes         |
|----------------------|--------------------------|
| Pale or turn blue    | <input type="checkbox"/> |
| Dizzy/Light-headed   | <input type="checkbox"/> |
| Passing out/Fainting | <input type="checkbox"/> |

27. Since the last visit, has your child ever experienced a severe allergic reaction that affect the throat, lungs, and/or cardiovascular system?  Yes  
 No  
 Don't know

¿En el último año, ha experimentado una reacción alérgica grave que afecto la garganta, los pulmones o corazón?

IF NO SKIP TO QUESTION 28

**If yes, to what foods? (select all that apply)**

|                                  | Yes, Doctor diagnosed | No, not doctor diagnosed |
|----------------------------------|-----------------------|--------------------------|
| Cow's Milk/Dairy Products/Cheese | <input type="radio"/> | <input type="radio"/>    |
| Egg                              | <input type="radio"/> | <input type="radio"/>    |
| Peanut                           | <input type="radio"/> | <input type="radio"/>    |
| Tree Nuts                        | <input type="radio"/> | <input type="radio"/>    |
| Fish                             | <input type="radio"/> | <input type="radio"/>    |
| Shellfish                        | <input type="radio"/> | <input type="radio"/>    |
| Wheat                            | <input type="radio"/> | <input type="radio"/>    |
| Soy/Tofu                         | <input type="radio"/> | <input type="radio"/>    |
| Seeds                            | <input type="radio"/> | <input type="radio"/>    |
| Other 1                          | <input type="radio"/> | <input type="radio"/>    |
| Other 2                          | <input type="radio"/> | <input type="radio"/>    |
| Other 3                          | <input type="radio"/> | <input type="radio"/>    |
| Other 4                          | <input type="radio"/> | <input type="radio"/>    |
| Other 5                          | <input type="radio"/> | <input type="radio"/>    |
| Other 6                          | <input type="radio"/> | <input type="radio"/>    |

Number of episodes since last visit  
Cow's Milk/Dairy Products/Cheese \_\_\_\_\_

Number of episodes since last visit  
Eggs \_\_\_\_\_

Number of episodes since last visit  
Peanut \_\_\_\_\_

Number of episodes since last visit  
Tree Nuts \_\_\_\_\_

Number of episodes since last visit  
Fish \_\_\_\_\_

Number of episodes since last visit  
Shellfish \_\_\_\_\_

Number of episodes since last visit  
Wheat \_\_\_\_\_

Number of episodes since last visit  
Soy/tofu \_\_\_\_\_

Number of episodes since last visit  
Seeds \_\_\_\_\_

IF other, specify:  
Other 1 \_\_\_\_\_

Number of episodes since last visit  
Other 1 \_\_\_\_\_

IF other, specify:  
Other 2

\_\_\_\_\_

Number of episodes since last visit  
Other 2

\_\_\_\_\_

IF other, specify:  
Other 3

\_\_\_\_\_

Number of episodes since last visit  
Other 3

\_\_\_\_\_

IF other, specify:  
Other 4

\_\_\_\_\_

Number of episodes since last visit  
Other 4

\_\_\_\_\_

IF other, specify:  
Other 5

\_\_\_\_\_

Number of episodes since last visit  
Other 5

\_\_\_\_\_

IF other, specify:  
Other 6

\_\_\_\_\_

Number of episodes since last visit  
Other 6

\_\_\_\_\_

**28. For food that you child had an allergic reaction to since the last visit, how long does it usually take from eating the food to the onset of the allergic symptoms.?**

**¿Después de comer la comida, cuánto tiempo toma para los síntomas a aparecer?**

28. How long does it usually take from eating the food to the onset of the allergic symptoms for COW'S MILK/DAIRY PRODUCTS/CHEESE?  
(Time until onset in DAYS)

\_\_\_\_\_ (number of days)

¿Después de comer la comida, cuánto tiempo toma para los síntomas a aparecer?

28. How long does it usually take from eating the food to the onset of the allergic symptoms for COW'S MILK/DAIRY PRODUCTS/CHEESE?  
(Time until onset in HOURS)

\_\_\_\_\_ (number of hours)

¿Después de comer la comida, cuánto tiempo toma para los síntomas a aparecer?

---

28. How long does it usually take from eating the food to the onset of the allergic symptoms for COW'S MILK/DAIRY PRODUCTS/CHEESE?  
(Time until onset in MINUTES)

\_\_\_\_\_   
(number of minutes)

¿Después de comer la comida, cuánto tiempo toma para los síntomas a aparecer?

---

28. How long does it usually take from eating the food to the onset of the allergic symptoms for EGGS?  
(Time until onset in DAYS)

\_\_\_\_\_   
(number of days)

---

28. How long does it usually take from eating the food to the onset of the allergic symptoms for EGGS?  
(Time until onset in HOURS)

\_\_\_\_\_   
(number of hours)

---

28. How long does it usually take from eating the food to the onset of the allergic symptoms for EGGS?  
(Time until onset in MINUTES)

\_\_\_\_\_   
(number of minutes)

---

28. How long does it usually take from eating the food to the onset of the allergic symptoms for PEANUTS?  
(Time until onset in DAYS)

\_\_\_\_\_   
(number of days)

---

28. How long does it usually take from eating the food to the onset of the allergic symptoms for PEANUTS?  
(Time until onset in HOURS)

\_\_\_\_\_   
(number of hours)

---

28. How long does it usually take from eating the food to the onset of the allergic symptoms for PEANUTS?  
(Time until onset in MINUTES)

\_\_\_\_\_   
(number of minutes)

---

28. How long does it usually take from eating the food to the onset of the allergic symptoms for TREE NUTS?  
(Time until onset in DAYS)

\_\_\_\_\_   
(number of days)

---

28. How long does it usually take from eating the food to the onset of the allergic symptoms for TREE NUTS?  
(Time until onset in HOURS)

\_\_\_\_\_   
(number of hours)

---

28. How long does it usually take from eating the food to the onset of the allergic symptoms for TREE NUTS?  
(Time until onset in MINUTES)

\_\_\_\_\_   
(number of minutes)

---

28. How long does it usually take from eating the food to the onset of the allergic symptoms for FISH?  
(Time until onset in DAYS)

\_\_\_\_\_   
(number of days)

---

28. How long does it usually take from eating the food to the onset of the allergic symptoms for FISH?  
(Time until onset in HOURS)

\_\_\_\_\_   
(number of hours)

---

28. How long does it usually take from eating the food to the onset of the allergic symptoms for FISH?  
(Time until onset in MINUTES)

\_\_\_\_\_   
(number of minutes)

---

28. How long does it usually take from eating the food to the onset of the allergic symptoms for SHELLFISH?  
(Time until onset in DAYS)

\_\_\_\_\_

(number of days)

---

28. How long does it usually take from eating the food to the onset of the allergic symptoms for SHELLFISH?  
(Time until onset in HOURS)

\_\_\_\_\_

(number of hours)

---

28. How long does it usually take from eating the food to the onset of the allergic symptoms for SHELLFISH?  
(Time until onset in MINUTES)

\_\_\_\_\_

(number of minutes)

---

28. How long does it usually take from eating the food to the onset of the allergic symptoms for WHEAT?  
(Time until onset in DAYS)

\_\_\_\_\_

(number of days)

---

28. How long does it usually take from eating the food to the onset of the allergic symptoms for WHEAT?  
(Time until onset in HOURS)

\_\_\_\_\_

(number of hours)

---

28. How long does it usually take from eating the food to the onset of the allergic symptoms for WHEAT?  
(Time until onset in MINUTES)

\_\_\_\_\_

(number of minutes)

---

28. How long does it usually take from eating the food to the onset of the allergic symptoms for SOY/TOFU?  
(Time until onset in DAYS)

\_\_\_\_\_

(number of days)

---

28. How long does it usually take from eating the food to the onset of the allergic symptoms for SOY/TOFU?  
(Time until onset in HOURS)

\_\_\_\_\_

(number of hours)

---

28. How long does it usually take from eating the food to the onset of the allergic symptoms for SOY/TOFU?  
(Time until onset in MINUTES)

\_\_\_\_\_

(number of minutes)

---

28. How long does it usually take from eating the food to the onset of the allergic symptoms for SEEDS?  
(Time until onset in DAYS)

\_\_\_\_\_

(number of days)

---

28. How long does it usually take from eating the food to the onset of the allergic symptoms for SEEDS?  
(Time until onset in HOURS)

\_\_\_\_\_

(number of hours)

---

28. How long does it usually take from eating the food to the onset of the allergic symptoms for SEEDS?  
(Time until onset in MINUTES)

\_\_\_\_\_

(number of minutes)

---

28. Name of Other Food Allergy #1

\_\_\_\_\_

---

28. How long does it usually take from eating the food to the onset of the allergic symptoms for OTHER FOOD ALLERGY #1?  
(Time until onset in DAYS)

\_\_\_\_\_

(number of days)



---

28. How long does it usually take from eating the food to the onset of the allergic symptoms for OTHER FOOD ALLERGY #1?  
(Time until onset in HOURS)

\_\_\_\_\_

(number of hours)

---

28. How long does it usually take from eating the food to the onset of the allergic symptoms for OTHER FOOD ALLERGY #1?  
(Time until onset in MINUTES)

\_\_\_\_\_

(number of minutes)

---

28. Name of Other Food Allergy #2

\_\_\_\_\_

---

28. How long does it usually take from eating the food to the onset of the allergic symptoms for OTHER FOOD ALLERGY #2?  
(Time until onset in DAYS)

\_\_\_\_\_

(number of days)

---

28. How long does it usually take from eating the food to the onset of the allergic symptoms for OTHER FOOD ALLERGY #2?  
(Time until onset in HOURS)

\_\_\_\_\_

(number of hours)

---

28. How long does it usually take from eating the food to the onset of the allergic symptoms for OTHER FOOD ALLERGY #2?  
(Time until onset in MINUTES)

\_\_\_\_\_

(number of minutes)

---

28. Name of Other Food Allergy #3

\_\_\_\_\_

---

28. How long does it usually take from eating the food to the onset of the allergic symptoms for OTHER FOOD ALLERGY #3?  
(Time until onset in DAYS)

\_\_\_\_\_

(number of days)

---

28. How long does it usually take from eating the food to the onset of the allergic symptoms for OTHER FOOD ALLERGY #3?  
(Time until onset in HOURS)

\_\_\_\_\_

(number of hours)

---

28. How long does it usually take from eating the food to the onset of the allergic symptoms for OTHER FOOD ALLERGY #3?  
(Time until onset in MINUTES)

\_\_\_\_\_

(number of minutes)

---

28. Name of Other Food Allergy #4

\_\_\_\_\_

---

28. How long does it usually take from eating the food to the onset of the allergic symptoms for OTHER FOOD ALLERGY #4?  
(Time until onset in DAYS)

\_\_\_\_\_

(number of days)

---

28. How long does it usually take from eating the food to the onset of the allergic symptoms for OTHER FOOD ALLERGY #4?  
(Time until onset in HOURS)

\_\_\_\_\_

(number of hours)

28. How long does it usually take from eating the food to the onset of the allergic symptoms for OTHER FOOD ALLERGY #4?  
(Time until onset in MINUTES)

\_\_\_\_\_ (number of minutes)

28. Name of Other Food Allergy #5

\_\_\_\_\_

28. How long does it usually take from eating the food to the onset of the allergic symptoms for OTHER FOOD ALLERGY #5?  
(Time until onset in DAYS)

\_\_\_\_\_ (number of days)

28. How long does it usually take from eating the food to the onset of the allergic symptoms for OTHER FOOD ALLERGY #5?  
(Time until onset in HOURS)

\_\_\_\_\_ (number of hours)

28. How long does it usually take from eating the food to the onset of the allergic symptoms for OTHER FOOD ALLERGY #5?  
(Time until onset in MINUTES)

\_\_\_\_\_ (number of minutes)

28. Name of Other Food Allergy #6

\_\_\_\_\_

28. How long does it usually take from eating the food to the onset of the allergic symptoms for OTHER FOOD ALLERGY #6?  
(Time until onset in DAYS)

\_\_\_\_\_ (number of days)

28. How long does it usually take from eating the food to the onset of the allergic symptoms for OTHER FOOD ALLERGY #6?  
(Time until onset in HOURS)

\_\_\_\_\_ (number of hours)

28. How long does it usually take from eating the food to the onset of the allergic symptoms for OTHER FOOD ALLERGY #6?  
(Time until onset in MINUTES)

\_\_\_\_\_ (number of minutes)

**29. Since the last visit, has your child ever had an allergic reaction that improved completely and then came back?**

**¿En el último año, ha tenido ... una reacción alérgica que mejoró completamente y luego regreso?**

29. Since the last visit, has your child ever had an allergic reaction that improved completely and then came back?

Yes  
 No

29. If yes, timing to onset of recurrent symptoms:  
Cow's Milk/Dairy Products/Cheese  
Days

\_\_\_\_\_ (Days)

---

29. If yes, timing to onset of recurrent symptoms:  
Cow's Milk/Dairy Products/Cheese  
Hours \_\_\_\_\_  
(Hours)

---

29. If yes, timing to onset of recurrent symptoms:  
Cow's Milk/Dairy Products/Cheese  
Minutes \_\_\_\_\_  
(Minutes)

---

29. If yes, timing to onset of recurrent symptoms:  
Eggs  
Days \_\_\_\_\_  
(Days)

---

29. If yes, timing to onset of recurrent symptoms:  
Eggs  
Hours \_\_\_\_\_  
(hours)

---

29. If yes, timing to onset of recurrent symptoms:  
Eggs  
Minutes \_\_\_\_\_  
(Minutes)

---

29. If yes, timing to onset of recurrent symptoms:  
Peanut  
Days \_\_\_\_\_  
(days)

---

29. If yes, timing to onset of recurrent symptoms:  
Peanut  
Hours \_\_\_\_\_  
(Hours)

---

29. If yes, timing to onset of recurrent symptoms:  
Peanut  
Minutes \_\_\_\_\_  
(Minutes)

---

29. If yes, timing to onset of recurrent symptoms:  
Tree nuts  
Days \_\_\_\_\_  
(days)

---

29. If yes, timing to onset of recurrent symptoms:  
Tree nuts  
Hours \_\_\_\_\_  
(Hours)

---

29. If yes, timing to onset of recurrent symptoms:  
Tree nuts  
Minutes \_\_\_\_\_  
(Minutes)

---

29. If yes, timing to onset of recurrent symptoms:  
Fish  
Days \_\_\_\_\_  
(Days)

---

29. If yes, timing to onset of recurrent symptoms:  
Fish  
Hours \_\_\_\_\_  
(Hours)

---

29. If yes, timing to onset of recurrent symptoms:  
Fish  
Minutes \_\_\_\_\_  
(Minutes)

---

29. If yes, timing to onset of recurrent symptoms:  
Shellfish  
Days \_\_\_\_\_  
(Days)

---

29. If yes, timing to onset of recurrent symptoms:  
Shellfish  
Hours \_\_\_\_\_  
(Hours)

---

29. If yes, timing to onset of recurrent symptoms:  
Shellfish  
Minutes \_\_\_\_\_  
(Minutes)

---

29. If yes, timing to onset of recurrent symptoms:  
Wheat  
Days \_\_\_\_\_  
(Days)

---

29. If yes, timing to onset of recurrent symptoms:  
Wheat  
Hours \_\_\_\_\_  
(Hours)

---

29. If yes, timing to onset of recurrent symptoms:  
Wheat  
Minutes \_\_\_\_\_  
(Minutes)

---

29. If yes, timing to onset of recurrent symptoms:  
Soy/Tofu  
Days \_\_\_\_\_  
(Days)

---

29. If yes, timing to onset of recurrent symptoms:  
Soy/Tofu  
Hours \_\_\_\_\_  
(Hours)

---

29. If yes, timing to onset of recurrent symptoms:  
Soy/Tofu  
Minutes \_\_\_\_\_  
(Minutes)

---

29. If yes, timing to onset of recurrent symptoms:  
Seeds  
Days \_\_\_\_\_  
(Days)

---

29. If yes, timing to onset of recurrent symptoms:  
Seeds  
Hours \_\_\_\_\_  
(Hours)

---

29. If yes, timing to onset of recurrent symptoms:  
Seeds  
Minutes \_\_\_\_\_  
(Min)

---

29. If yes, timing to onset of recurrent symptoms:  
Other 1  
Days \_\_\_\_\_  
(Days)

---

29. If yes, timing to onset of recurrent symptoms:  
Other 1  
Hours \_\_\_\_\_  
(Hours)

---

29. If yes, timing to onset of recurrent symptoms:  
Other 1  
Minutes \_\_\_\_\_  
(Minutes)

---

29. If yes, timing to onset of recurrent symptoms:  
Other 2  
Days \_\_\_\_\_  
(Days)

---

29. If yes, timing to onset of recurrent symptoms:  
Other 2  
Hours \_\_\_\_\_  
(Hours)

---

29. If yes, timing to onset of recurrent symptoms:  
Other 2  
Minutes \_\_\_\_\_  
(Minutes)

---

29. If yes, timing to onset of recurrent symptoms:  
Other 3  
Days \_\_\_\_\_  
(Days)

---

29. If yes, timing to onset of recurrent symptoms:  
Other 3  
Hours \_\_\_\_\_  
(Hours)

---

29. If yes, timing to onset of recurrent symptoms:  
Other 3  
Minutes \_\_\_\_\_  
(Minutes)

---

29. If yes, timing to onset of recurrent symptoms:  
Other 4  
Days \_\_\_\_\_  
(Days)

---

29. If yes, timing to onset of recurrent symptoms:  
Other 4  
Hours \_\_\_\_\_  
(Hours)

---

29. If yes, timing to onset of recurrent symptoms:  
Other 4  
Minutes \_\_\_\_\_  
(Minutes)

---

29. If yes, timing to onset of recurrent symptoms:  
Other 5  
Days \_\_\_\_\_  
(Days)

---

29. If yes, timing to onset of recurrent symptoms:  
Other 5  
Hours \_\_\_\_\_  
(Hours)

---

29. If yes, timing to onset of recurrent symptoms:  
Other 5  
Minutes \_\_\_\_\_  
(Minutes)

---

29. If yes, timing to onset of recurrent symptoms:  
Other 6  
Days \_\_\_\_\_  
(Days)

---

29. If yes, timing to onset of recurrent symptoms:

Other 6

Hours

\_\_\_\_\_ (Hours)

29. If yes, timing to onset of recurrent symptoms:

Other 6

Minutes

\_\_\_\_\_ (Minutes)

### Pediatric Sleep Questionnaire

A47. Does the time at which your child goes to bed change a lot from day to day?

- Yes  
 No  
 Don't know

¿La hora en que... duerme cambia mucho cada día o normalmente duerme a la misma hora cada día?

A48. Does the time at which your child gets up from bed change a lot from day to day?

- Yes  
 No  
 Don't know

¿La hora en que... levante cambia mucho cada día o se levante a la misma hora cada día?

A49. What time does your child go to bed (fall asleep) during the week?

\_\_\_\_\_ (24hr)

¿A que hora duerme... normalmente durante la semana?

A50. What time does your child go to bed (fall asleep) on the weekend or vacation?

\_\_\_\_\_ (24hr)

¿A que hora duerme... normalmente durante la fin de semana?

A51. What time does your child usually get out of bed (wake up) on weekday mornings?

\_\_\_\_\_ (24 hr)

¿A que hora se levanta ... normalmente la semana?

A52. What time does your child usually get out of bed (wake up) on weekend or vacation mornings?

\_\_\_\_\_ (24 hr)

¿A que hora se levanta... normalmente durante la fin de semana?

A.53 How many hours of sleep does your child usually get on (weekday) school nights?

Hours

\_\_\_\_\_ (Hours)

A.53 How many hours of sleep does your child usually get on (weekday) school nights?

Minutes

\_\_\_\_\_ (Minutes )

A.54 How many hours of sleep does your child usually get on (weekend) non-school nights?

Hours

\_\_\_\_\_ (Hours)

A.54 How many hours of sleep does your child usually get on (weekend) non-school nights?

Minutes

\_\_\_\_\_ (Minutes)

**If the child is < 2 years old skip to question B10**

B7. Does your child wake up with headaches in the morning?

- Yes  
 No  
 Don't know

¿Normalmente, tiene...dolor de cabeza en la mañana?

B8. Does your child get a headache at least once a month, on average?

- Yes  
 No  
 Don't know

¿Tiene dolor de cabeza al menos una vez por mes?

B10. Does your child still have tonsils and/or adenoids?

- Yes  
 No  
 Don't know

¿Tiene... sus amígdalas o adenoides o han sido removidos? (por una cirugía)

If not, when were they removed?  
years

\_\_\_\_\_ (years)

If not, when were they removed?  
Months

\_\_\_\_\_ (Months)

B11. Has your child ever had a condition causing difficulty with breathing?

- Yes  
 No  
 Don't know

¿Ha tenido... un problema que causa dificultad para respirar?

If so, please describe

\_\_\_\_\_

30. On an average day, how many hours and minutes does your child watch Tv?

- Don't know

30. On an average day, how many hours and minutes does your child watch TV?

Hours

\_\_\_\_\_ (Hours/ horas)

¿Cuántas horas por día mira televisión?  
Horas

30. On an average day, how many hours and minutes does your child watch TV?

\_\_\_\_\_ (Minutes)

¿Cuántas horas por día mira televisión?

31. On an average day, how many hours and minutes does your child spend playing video games or sitting in front of the computer? Include both time spent on the computer at home and at school.

Don't know

31. On an average day, how many hours and minutes does your child spend playing video games or sitting in front of the computer? Include both time spent on the computer at home and at school.

\_\_\_\_\_  
(Hours)

Hours

¿Cuántas horas por día está... en la computadora?

31. On an average day, how many hours and minutes does your child spend playing video games or sitting in front of the computer? Include both time spent on the computer at home and at school.

\_\_\_\_\_  
(Minutes)

Minutes

¿Cuántas horas por día está... en la computadora?

32. If your child goes to school, in an average week when your child is in school, how many days does your child go to physical education (PE) classes?

Don't know  
 Doesn't attend school

32. If your child goes to school, in an average week when your child is in school, how many days does your child go to physical education (PE) classes?

\_\_\_\_\_  
(Days)

Days

¿En la escuela, va... a clase de gimnasia?  
¿Cuántas días por semana?

33. Since the last visit, did your child play on any sports teams or participate in other organized physical activities? Some examples would include dance classes, YMCA swim classes, weekend park district, church or school basketball teams, or other teams or activities run by schools or local community centers.

Yes  
 No  
 Don't know

¿En el último año, participó... en algunos deportes?

34. On an average day, how many hours and minutes does your child spend in active play? Some examples of active play include running around, playing catch, basketball and bicycling. (PROMPT: If respondent indicates that answer would vary based on the time of year, ask them to average out their child's activity. For example, if the answer in the summer would be 8 hours a day, and in the winter 4 hours, the answer should be hours. You may need to help them with the math.

\_\_\_\_\_  
(Hours)

Hours

¿Cuántas horas por día está corriendo, jugando, haciendo muy activo(a)?



34. On an average day, how many hours and minutes does your child spend in active play? Some examples of active play include running around, playing catch, basketball and bicycling. (PROMPT: If respondent indicates that answer would vary based on the time of year, ask them to average out their child's activity. For example, if the answer in the summer would be 8 hours a day, and in the winter 4 hours, the answer should be 6 hours. You may need to help them with the math.)

Minutes

\_\_\_\_\_ (Minutes)

¿Cuántas horas por día está corriendo, jugando, haciendo muy activo(a)?

34. On an average day, how many hours and minutes does your child spend in active play? Some examples of active play include running around, playing catch, basketball and bicycling. (PROMPT: If respondent indicates that answer would vary based on the time of year, ask them to average out their child's activity. For example, if the answer in the summer would be 8 hours a day, and in the winter 4 hours, the answer should be 6 hours. You may need to help them with the math.)

Hours

Don't know (Hours)

35. About how physically active is your child compared to other children his/her age? Would you say about the same, a lot less, a little less, a little more, a lot more active?

¿Ud. Cree que, comparado a otros niños de la misma edad, que... es más activo, o menos activos que otros niños? ¿Mucho más (o menos) o poco más (menos)?

1. A lot less active  
 2. A little less active  
 3. Same  
 4. A little more active  
 5. A lot more active

36. Do you live close enough to your child's school that he/she could walk or bike to school?

¿Ud. Vive cerca de la escuela para que puede caminar o montar la bicicleta a escuela?

- Yes  
 No  
 Don't know  
 Not applicable

37. How many days a week does your child bike to school?

Don't know

37. How many days a week does your child bike to school?

Days

\_\_\_\_\_ (days)

¿Cuántas días por semana monta su bicicleta para ir a la escuela?

38. How many days a week does your child walk to school?

Don't Know

38. How many days a week does your child walk to school?

Days

(Days)

¿Cuántas días por semana camina para ir a la escuela?

## Section II. Family History

39. What is your present marital status?

¿Mamá Ud. esta...?

Casada

Viuda

Divorciada

Separada

Soltera

- Married
- Widowed
- Divorced
- Separated
- Single

40. What is the highest grade of school you have completed to date?

¿Qué grado de escuela Ud. terminó?

- No school
- Elementary school
- Some secondary school (9th grade and above)
- High school graduate or GED
- Some college
- College degree
- Graduate school degree
- Post Graduate (PhD/MD/Other)

41. Are you currently working for pay?

¿Ud. Está trabajando?

- Yes
- No
- Retired

42. What is your occupation/job title?

¿Cuál es su ocupación?

41. What field does your occupation fall under?

- Not Applicable
- Management/Business/Administration
- Financial/Computer/Mathematical
- Architecture and Engineering
- Life, Physical, and Social Science
- Legal Occupations
- Education, Training, and Library
- Sales, Arts, Design, Entertainment, and Media
- Athletics (Sports, Dancing, etc)
- Healthcare
- Food Preparation and Serving
- Building and Grounds Cleaning and Maintenance
- Personal Care and Service
- Farming, Fishing, and Forestry
- Construction Trades
- Extraction Workers
- Installation, Maintenance, and Repair Workers
- Production Occupations
- Transportation and Material Moving
- Military Specific
- Other
- Don't know

42. Will you answer some questions about your child's biological father?

- Yes  
 No

¿Puedo preguntar sobre el padre?

43. What is the highest grade of school he has completed to date?

- Elementary school  
 Some secondary school (9th grade and above)  
 High school graduate or GED  
 Some college  
 College degree  
 Graduate school degree  
 Post Graduate (PhD/MD/Other)  
 Don't know

¿Y por el padre que grado de escuela terminó el?

44. Is he currently working for pay?

- Yes  
 No  
 Retired  
 Don't know

¿Y él está trabajando?

What is his occupation/ Job title  
Don't know

- Don't know

45. What is his occupation/job title?

¿Cuál es su ocupación?

46. What field does his occupation fall under?

- Not Applicable  
 Management/Business/Administration  
 Financial/Computer/Mathematical  
 Architecture and Engineering  
 Life, Physical, and Social Science  
 Legal Occupations  
 Education, Training, and Library  
 Sales, Arts, Design, Entertainment, and Media  
 Athletics (Sports, Dancing, etc)  
 Healthcare  
 Food Preparation and Serving  
 Building and Grounds Cleaning and Maintenance  
 Personal Care and Service  
 Farming, Fishing, and Forestry  
 Construction Trades  
 Extraction Workers  
 Installation, Maintenance, and Repair Workers  
 Production Occupations  
 Transportation and Material Moving  
 Military Specific  
 Other  
 Don't know

### Section III. Home Environment

47. What was your total household income last year, before taxes? (INCLUDES PUBLIC ASSISTANCE)

¿Cuál fue su ingreso familiar el año pasado antes de impuestos?

- < \$5,000  
 \$5,000-9,999  
 \$10,000-14,999  
 \$15,000-19,999  
 \$20,000-24,999  
 \$25,000-29,999  
 \$30,000-34,999  
 \$35,000-39,999  
 \$40,000-49,999  
 \$50,000-59,999  
 \$60,000-79,999  
 \$80,000-99,999  
 > \$100,000  
 Don't know

#### 48. Here are some questions about your current home:

a) How long have you lived in your current home?  
(TIME IN YEARS)

\_\_\_\_\_

¿Cuántos años ha vivido Ud. en su Casa?

a) How long have you lived in your current home?  
(TIME IN MONTHS)

\_\_\_\_\_

b) What type of housing is your home?

¿Qué tipo de casa?  
apartamento

- Single family  
 Duplex  
 Row House  
 Condo/Apartment  
 Trailer Home  
 Shelter

c) # of bedrooms

¿Cuántas habitaciones tiene en la casa?

\_\_\_\_\_

d) # of bathrooms

¿Cuántos baños?

\_\_\_\_\_

e) # of people who permanently live in your home

¿Cuántas personas viven allí?

\_\_\_\_\_

f) What type of fuel do you use for heating your home?

¿Qué usa Ud. para calentar la casa?  
Aceite  
Electricidad  
Gas

- Oil  
 Electricity  
 Gas

If Others, specify:

\_\_\_\_\_ (other type of fuel used for heating the home)

g) What type of stove do you use for cooking?

- Gas  
 Electric

¿Y para cocinar?

Gas  
 Electricidad

If Others, specify:

\_\_\_\_\_  
 (other type of fuel used for cooking)

h) Do you have any wall to wall carpet in your home?

- Yes  
 No

¿Hay alfombra de pared a pared en alguna parte de la casa?

If yes, specify location:

Sala  
 Sala de estar  
 Comendar  
 Cocina  
 Habitaciones  
 Sótano  
 Baño

- Living room  
 Family room  
 Dining room  
 Kitchen  
 Bedroom (master) parents  
 Bedroom index child  
 Bedroom Sib#1  
 Bedroom Sib#2  
 Basement  
 Bathroom

i) Approximately how old is the building/apartment/home you live in?

- 10 years or less  
 11-25 years  
 26-50 years  
 51-75 years  
 Greater than 75 years old  
 Don't know

¿Cuántos años tiene desde su casa ha sido consumado?

49. Do you (mother of the child) currently smoke cigarettes, cigars, or pipes?

- Yes  
 No

¿Ud. fuma? (¿Ha fumado?)

If yes, what do/did you smoke?

Cigarrillos  
 Cigarros  
 Pipa

- Cigarettes  
 Cigars  
 Pipes

If yes to Q 49,  
 Do you smoke inside the home?

- Yes  
 No

¿Fuma en la casa?

How many (cigarettes, cigars, pipes) do you smoke PER DAY (Regardless of indoor or outdoor)

\_\_\_\_\_

¿Cuántos cigarrillos fuma por día?  
 En la casa o a fuera

50a. Can I ask you about your child's biological father's smoking status?

- Yes  
 No

50b. Does your child's father currently smoke cigarettes, cigars, or pipes?  Yes  
 No  
 Don't Know

¿Y el padre de ... fuma?

If yes, what does/did he smoke?  Cigarettes  
 Cigars  
 Pipes

Cigarrillos  
Cigarros  
Pipa

If yes to Q 50b, Does he smoke inside the home?  Yes  
 No

¿Fuma él en la casa?

How many (cigarettes, cigars, pipes) does he smoke PER DAY (Regardless of indoor or outdoor)? \_\_\_\_\_  
(per day)

¿Cuántos cigarrillos fuma por día?

51. Do other people who currently live in your home cigarettes, cigars or pipes (not including the mother and father of the child)?  Yes  
 No

¿Hay otras personas en la casa que fuman?

How many people?

¿Cuántas personas? \_\_\_\_\_  
(# of people)

How many of them smoke inside the home?

¿Cuántas personas fuman en la casa? \_\_\_\_\_

52. Total numbers of cigarettes smoked inside your home per day (NOT INCLUDING AMOUNT SMOKED by yourself and the father of your child)? \_\_\_\_\_

¿Cuántos cigarrillos fuman por día en la casa?

53. Do you currently have any pets in your home?  Yes  
 No

¿Tiene Ud. mascotas o animales en la casa?

**If yes, specify type of pet and how many of each type:**

|                   | Yes                   | No                    |
|-------------------|-----------------------|-----------------------|
| Cat / Gato        | <input type="radio"/> | <input type="radio"/> |
| Dog / Pero        | <input type="radio"/> | <input type="radio"/> |
| Reptiles / Reptil | <input type="radio"/> | <input type="radio"/> |
| Rabbit / Conejo   | <input type="radio"/> | <input type="radio"/> |

|                |                       |                       |
|----------------|-----------------------|-----------------------|
| Fish / Pez     | <input type="radio"/> | <input type="radio"/> |
| Guinea Pig     | <input type="radio"/> | <input type="radio"/> |
| Birds / Pájaro | <input type="radio"/> | <input type="radio"/> |
| Others         | <input type="radio"/> | <input type="radio"/> |

---

How many cats?

\_\_\_\_\_

---

How many dogs?

\_\_\_\_\_

---

How many reptiles?

\_\_\_\_\_

---

How many rabbits?

\_\_\_\_\_

---

How many fish?

\_\_\_\_\_

---

How many guinea pigs?

\_\_\_\_\_

---

How many birds?

\_\_\_\_\_

---

If others, specify:  
Type other 1

\_\_\_\_\_

---

How many others?  
First other

\_\_\_\_\_

---

If others, specify:  
Type other 2

\_\_\_\_\_

---

How many others?  
Second other

\_\_\_\_\_

---

If others, specify:  
Type other 3

\_\_\_\_\_

---

How many others?  
Third other

\_\_\_\_\_

---

54. Does the house you live in have any cockroaches?

- Yes  
 No  
 Unsure

¿Hay cucarachas en la casa?

---

55. Does the house you live in have any mice/rats?

- Yes  
 No

¿Hay ratones en las casa?

---

56. Does the house you live in have any visible mold, mildew, water damage, leakage or seepage?

- Yes  
 No

¿Hay moho o daños por agua en la casa?

---

56. Do you currently live in a farming environment?

- Yes  
 No

¿Ud. no vive en una granja, verdad?
