# Supplementary material for: Boston Birth Cohort profile: rationale and study design
Source: PubMed Central journal article supplement (PMC9844822; doi:10.1097/pn9.0000000000000011), 2022-08-18
Supplement: NIHMS1818381-supplement-_10.pdf [file NIHMS1818381-supplement-_10.pdf]

# Medical Record Abstraction

Study ID

\_\_\_\_\_

## Quality Assurance: Interview

Interviewer's Name

\_\_\_\_\_  
(First and last name)

Date of Interview

\_\_\_\_\_

Result of Interview

- Complete  
 Incomplete

If complete, specify

\_\_\_\_\_

Reviewed by

\_\_\_\_\_  
(First and last name)

Date of Review

\_\_\_\_\_

Result of review

- Complete  
 Incomplete

Recommendations

\_\_\_\_\_

## Quality Assurance: Abstract

Abstractor Name

\_\_\_\_\_  
(First and last name)

Abstraction Date

\_\_\_\_\_

Reviewed by

\_\_\_\_\_  
(First and last name)

Date of Review

\_\_\_\_\_

Result of review

- Complete  
 Incomplete

Recommendations

\_\_\_\_\_

1. Prenatal Care

- No Prenatal Care
- Prenatal Care Outside BMC
- Prenatal Care at BMC
- Prenatal Care Both Outside and at BMC

Starts at week at BMC

\_\_\_\_\_

# of Documented Visits at BMC

\_\_\_\_\_

Rec. avail from week at BMC

\_\_\_\_\_

Starts at Week Outside BMC

\_\_\_\_\_

# Documented Visits Outside BMC

\_\_\_\_\_

Rec avail from week Outside BMC

\_\_\_\_\_

Starts at Week at BMC

\_\_\_\_\_

# Documented Visits BMC

\_\_\_\_\_

Rec avail from wk BMC

\_\_\_\_\_

Starts at week Outside BMC

\_\_\_\_\_

# Documented Visits Outside BMC

\_\_\_\_\_

Rec Avail from Wk Outside BMC

\_\_\_\_\_

2. Date of Last Menstrual Period

- Certain
- Uncertain
- Unknown

Please Specify LMP Date

\_\_\_\_\_

3a. Gravidity

\_\_\_\_\_

3b. Parity

\_\_\_\_\_

3c. TAB

\_\_\_\_\_

---

3d. SAB

---

---

4a. Gestational Age By LMP

---

(Decimal weeks by LMP)

---

---

4a. EDC by LMP

---

---

4b. Gestational Age by Ultrasound

---

(Decimal Weeks by Ultrasound)

---

---

4b. EDC by Ultrasound

---

---

4c. Gestational Age by Dubowitz at birth

---

(Decimal weeks by Dubowitz at birth)

---

---

4c. Dubowitz Total score

---

---

4d. Gestational Age by New Ballard Score

---

(Decimal weeks by New Ballard Score)

---

---

4d. New Ballard Score: Total score

---

---

5a. Apgars at 1 Minute

---

---

5b. Apgars at 5 Min

---

---

5c. Apgars at 10 Min

---

---

6. Birth Weight

---

---

6a. Type of Delivery

- Vaginal
- C/S

---

6b. Length of Ruptured of Membranes

- Known
- Unknown

---

Hours

---

(hours)

---

---

Minutes

---

(minutes)

---

6c. Clinical Presentation Before Delivery

- Uterine contraction as first sign of labor
- Rupture of Membrane without uterine contraction as first sign of labor: Water broke noted by mom
- Rupture of Membrane without uterine contraction as first sign of labor: Fern test positive
- Rupture of Membrane without uterine contraction as first sign of labor: Both by mom and fern test
- Both uterine contraction and rupture of membrane as first sign of labor
- Medical Induction(no Contraction, no ROM, to end pregnancy due to medical reasons)

Medical Induction

- Artificial Initiation of Labor
- No artificial Initiation of Labor

Artificial Initiation of Labor

- Postdate (>40 Weeks)
- Maternal Complications (eg, PIH)
- Fetal Distress/IUGR
- Other

Artificial Initiation of labor if Other

\_\_\_\_\_

C/S: No artificial initiation of labor

- Elective C/S
- Repeat C/S
- Postdate (>40 weeks)
- Breech Presentation
- Pelvic-fetal Disproportion
- Maternal Complications (eg, PIH)
- Fetal Distress / IUGR
- Other

CS: No Artificial Initiation of Labor if other

\_\_\_\_\_

**8. Complications of the Index Pregnancy**

8a. Preeclampsia

- No
- Mild
- Severe

8b. Eclampsia

- Yes
- No

8c. Chronic Hypertension

- Yes
- No

8d. Gestational Hypertension

- Yes
- No

8e. Placental Abruption

- Yes
- No

8f. Placenta Previa

- Yes
- No

8f. Incompetent Cervix

- Yes
- No

---

If yes, Suture placed  Yes  
 No

---

At week \_\_\_\_\_

---

8h. Diabetes  No  
 GDM  
 DM

---

8i. Genital Tract Infections  Yes  
 No

---

8j. Urinary Tract Infections  Yes  
 No

---

8k. HELLP Syndrome  Yes  
 No

---

8l. Oligohydramnios  Yes  
 No

---

If yes, the lowest amniotic fluid level(< =5cm) \_\_\_\_\_

---

8m. Polyhydramnios  Yes  
 No

---

If yes, the highest amniotic fluid level (>=25) \_\_\_\_\_

---

8n. Meconium in Amniotic Fluid  Yes  
 No

---

8o. Any documented preterm non Braxton-Hicks contractions  Yes  
 No

---

8p. First Documented preterm contractions at \_\_\_\_\_  
(weeks)

---

8q. Number of Documented Preterm Contraction Episodes \_\_\_\_\_

---

8r. Bed Rest  Yes  
 No

---

8r. Tocolysis  None  
 Magnesium Sulfate  
 Beta2-adrenergic agents  
 other

---

8r. Betamethazone  None  
 1 Dose  
 2 or more doses

---

8r. IV Fluids  Yes  
 No

---

8r. Other  Yes  
 No

---

Specify Other \_\_\_\_\_

---

8s. Fetal Fibronectin 1  
\_\_\_\_\_

---

Fetal Fibronectin 1 Results  Positive  
 Negative  
 Unknown

---

Fetal Fibronectin 2  
\_\_\_\_\_

---

Fetal Fibronectin 2 Results  Positive  
 Negative  
 Unknown

---

8t. Vaginal Bleeding  Yes  
 No

---

During first trimester  Yes  
 No

---

During 2nd trimester  Yes  
 No

---

During 3rd trimester  Yes  
 No

---

Preceding onset of labor  Yes  
 No

---

8u. Signs of Chorioamnionitis  Yes  
 No

---

Maternal Temperature >38c  Yes  
 No

---

Uterine tenderness  Yes  
 No

---

Foul smelling vaginal discharge or amniotic fluid  Yes  
 No

---

Maternal tachycardia  Yes  
 No

---

Fetal tachycardia  Yes  
 No

Maternal white blood cell count >15,000  Yes  
 No

8v. Were any intrapartum antibiotics administered  Yes  
 No

**If yes, specify intrapartum antibiotic administration: Check all that apply**  
**If none administered check "None"**

|                    | None                  | One dose < 4 hours prior to delivery | One dose >=4 hours prior to delivery | 2 or more doses       | Given, but time unknown |
|--------------------|-----------------------|--------------------------------------|--------------------------------------|-----------------------|-------------------------|
| Ampicillin         | <input type="radio"/> | <input type="radio"/>                | <input type="radio"/>                | <input type="radio"/> | <input type="radio"/>   |
| Clindamycin        | <input type="radio"/> | <input type="radio"/>                | <input type="radio"/>                | <input type="radio"/> | <input type="radio"/>   |
| Gentamicin         | <input type="radio"/> | <input type="radio"/>                | <input type="radio"/>                | <input type="radio"/> | <input type="radio"/>   |
| Penicillin         | <input type="radio"/> | <input type="radio"/>                | <input type="radio"/>                | <input type="radio"/> | <input type="radio"/>   |
| Other Antibiotic 1 | <input type="radio"/> | <input type="radio"/>                | <input type="radio"/>                | <input type="radio"/> | <input type="radio"/>   |
| Other Antibiotic 2 | <input type="radio"/> | <input type="radio"/>                | <input type="radio"/>                | <input type="radio"/> | <input type="radio"/>   |

If other, specify antibiotic 1 \_\_\_\_\_

If other, specify antibiotic 2 \_\_\_\_\_

9. Amniocentesis  Yes  
 No

If yes, what was the result  Normal  
 Abnormal  
 Unknown

If Abnormal, specify \_\_\_\_\_

10. Number of Prenatal Ultrasounds \_\_\_\_\_

Please specify any abnormal results \_\_\_\_\_

U/S gestational week at which the FIRST U/S was performed \_\_\_\_\_  
 (2 decimal places)

LMP gestational week at which the FIRST U/S was performed \_\_\_\_\_  
 (2 Decimal places)

11. Placenta Sent for Pathology  Yes  
 No

---

12. Does the mother smoke or drink or take drug  Yes  
 No

---

Pre pregnancy Smoking  Yes  
 No

---

Type of cigarette  Cigarette  
 E-Cigarette

---

Number of cigs per day \_\_\_\_\_

---

Pre pregnancy Alcohol  Yes  
 No

---

Number drinks/week \_\_\_\_\_

---

Pre pregnancy Drug Type 1 \_\_\_\_\_

---

#use/wk \_\_\_\_\_

---

Pre pregnancy Drug Type 2 \_\_\_\_\_

---

#use/wk \_\_\_\_\_

---

Pre pregnancy Drug Type 3 \_\_\_\_\_

---

#use/wk \_\_\_\_\_

---

Pre pregnancy Drug Type 4 \_\_\_\_\_

---

#use/wk \_\_\_\_\_

---

1st Trimester Smoking  Yes  
 No

---

Type of cigarette  Cigarette  
 E-Cigarette

---

Number of sigs per day \_\_\_\_\_

---

1st Trimester Alcohol  Yes  
 No



Number drinks/week

---

1st Trimester Drug type 1

---

#use/wk

---

1st Trimester Drug type 2

---

#use/wk

---

1st Trimester Drug type 3

---

#use/wk

---

1st Trimester Drug type 4

---

#use/wk

---

2nd trimester Smoking

- Yes
- No

Type of cigarette

- Cigarette
- E-Cigarette

#cigs/day

---

2nd Trimester Alcohol

- Yes
- No

#drinks/week

---

2nd trimester drug type 1

---

#use/wk 1

---

2nd trimester drug type 2

---

#use/wk 2

---

2nd trimester drug type 3

\_\_\_\_\_

#use/wk 3

\_\_\_\_\_

2nd trimester drug type 4

\_\_\_\_\_

#use/wk 4

\_\_\_\_\_

3rd trimester smoking

- Yes
- No

Type of cigarette

- Cigarette
- E-Cigarette

#cigs/days

\_\_\_\_\_

3rd trimester alcohol

- Yes
- No

#drinks/wk

\_\_\_\_\_

3rd trimester Drug Type 1

\_\_\_\_\_

#use/wk

\_\_\_\_\_

3rd trimester Drug Type 2

\_\_\_\_\_

#use/wk

\_\_\_\_\_

3rd trimester Drug Type 3

\_\_\_\_\_

#use/wk

\_\_\_\_\_

3rd trimester Drug Type 4

\_\_\_\_\_

#use/wk

\_\_\_\_\_

15. Mother Received anesthesia

- Yes
- No

17. CBC  Yes  
 No

18. Mother Transfused  Yes  
 No

If yes, Date Transfused:

\_\_\_\_\_

Transfusion Time: 24 Hour Clock

\_\_\_\_\_

Transfusion, number of units

\_\_\_\_\_

19. Amniotic Fluid Culture  Yes  
 No

If Yes, specify pathogen

\_\_\_\_\_

20. Urine Culture  Yes  
 No

21a. Urinary Tract Infection during 1st and 2nd trimester (< 27 weeks gestation)  1. Neither Reported or indicated by labs  
 2. Pt Report Only  
 3. (+) urine Culture only or chart mentioned in problem list  
 4. Both 2 and 3  
 5. (+) urine culture but < 50,000 colonies  
 6. Unable to determine

21b. Urinary Tract Infection during 3rd trimester (>= 27 weeks gestation)  1. Neither Reported or indicated by labs  
 2. Pt Report Only  
 3. (+) urine Culture only or chart mentioned in problem list  
 4. Both 2 and 3  
 5. (+) urine culture but < 50,000 colonies  
 6. Unable to determine

**Any significant past medical history: USE MEDICAL RECORD INFO ONLY**

Asthma  Yes  
 No

If Yes  During Pregnancy  
 Before Pregnancy  
 Both

Hyperthyroidism  Yes  
 No

If Yes  During Pregnancy  
 Before Pregnancy  
 Both

---

Hypothyroidism

- Yes  
 No

---

If Yes:

- During Pregnancy  
 Before Pregnancy  
 Both

---

Endometriosis

- Yes  
 No

---

If yes:

- During Pregnancy  
 Before Pregnancy  
 Both

---

Uterine Myoma

- Yes  
 No

---

If yes

- During Pregnancy  
 Before Pregnancy  
 Both

---

Uterine Malformation

- Yes  
 No

---

If yes:

- During Pregnancy  
 Before Pregnancy  
 Both

---

Pelvic Inflammatory Disease

- Yes  
 No

---

If yes

- During Pregnancy  
 Before Pregnancy  
 Both

---

Abnormal PAP Smear

- Yes  
 No

---

If yes

- During Pregnancy  
 Before Pregnancy  
 Both

---

Polycystic Ovaries

- Yes  
 No

---

If yes

- During Pregnancy  
 Before Pregnancy  
 Both

---

Abdominal Operation

- Yes  
 No

---

If yes

- During Pregnancy  
 Before Pregnancy  
 Both

|                        |                                                                                                                |
|------------------------|----------------------------------------------------------------------------------------------------------------|
| Anemia                 | <input type="radio"/> Yes<br><input type="radio"/> No                                                          |
| If yes                 | <input type="radio"/> During Pregnancy<br><input type="radio"/> Before Pregnancy<br><input type="radio"/> Both |
| Malignant Tumor        | <input type="radio"/> Yes<br><input type="radio"/> No                                                          |
| If yes                 | <input type="radio"/> During Pregnancy<br><input type="radio"/> Before Pregnancy<br><input type="radio"/> Both |
| Tuberculosis           | <input type="radio"/> Yes<br><input type="radio"/> No                                                          |
| If yes                 | <input type="radio"/> During Pregnancy<br><input type="radio"/> Before Pregnancy<br><input type="radio"/> Both |
| Cardiovascular Disease | <input type="radio"/> Yes<br><input type="radio"/> No                                                          |
| If yes                 | <input type="radio"/> During Pregnancy<br><input type="radio"/> Before Pregnancy<br><input type="radio"/> Both |
| High Blood Pressure    | <input type="radio"/> Yes<br><input type="radio"/> No                                                          |
| If Yes                 | <input type="radio"/> During Pregnancy<br><input type="radio"/> Before Pregnancy<br><input type="radio"/> Both |
| Auto-immune Disease    | <input type="radio"/> Yes<br><input type="radio"/> No                                                          |
| If Yes                 | <input type="radio"/> During Pregnancy<br><input type="radio"/> Before Pregnancy<br><input type="radio"/> Both |
| Drug Allergy           | <input type="radio"/> Yes<br><input type="radio"/> No                                                          |
| If yes                 | <input type="radio"/> During Pregnancy<br><input type="radio"/> Before Pregnancy<br><input type="radio"/> Both |
| Seizure Disorder       | <input type="radio"/> Yes<br><input type="radio"/> No                                                          |
| If yes                 | <input type="radio"/> During Pregnancy<br><input type="radio"/> Before Pregnancy<br><input type="radio"/> Both |

---

Gestational Diabetes

- Yes  
 No

---

If yes

- During Pregnancy  
 Before Pregnancy  
 Both

---

Diabetes Mellitus

- Yes  
 No

---

If yes

- During Pregnancy  
 Before Pregnancy  
 Both

---

Infertility (Unable to get pregnant after one year of unprotected intercourse)

- Yes  
 No

---

Age Diagnosed

\_\_\_\_\_

---

Any Treatment:(check all that apply)

- Medications  
 Intrauterine Insemination(IUI)  
 In-vitro-Fertilization  
 Others

---

If Other

\_\_\_\_\_

---

Mother is allergic to food or environmental allergens

- Yes  
 No

---

Cow's Milk

- Yes  
 No

---

Egg

- Yes  
 No

---

Peanut

- Yes  
 No

---

Walnut

- Yes  
 No

---

sesame

- Yes  
 No

---

Shellfish

- Yes  
 No

---

Fish

- Yes  
 No

---

Soy

- Yes  
 No

|                                 |                                                            |
|---------------------------------|------------------------------------------------------------|
| Wheat                           | <input type="radio"/> Yes<br><input type="radio"/> No      |
| Cat                             | <input type="radio"/> Yes<br><input type="radio"/> No      |
| Dog                             | <input type="radio"/> Yes<br><input type="radio"/> No      |
| Cockroach                       | <input type="radio"/> Yes<br><input type="radio"/> No      |
| Dust Mites                      | <input type="radio"/> Yes<br><input type="radio"/> No      |
| Molds                           | <input type="radio"/> Yes<br><input type="radio"/> No      |
| Others                          | <input type="radio"/> Yes<br><input type="radio"/> No      |
| If others, specify              | _____                                                      |
| Eczema                          | <input type="radio"/> Yes<br><input type="radio"/> No      |
| Seasonal Allergy (or Hay Fever) | <input type="radio"/> Yes<br><input type="radio"/> No      |
| If Others, specify              | _____                                                      |
| <b>BABY INFORMATION</b>         |                                                            |
| Date of Delivery                | _____<br>(Month and Year only)                             |
| Time of delivery                | _____                                                      |
| Baby Gender                     | <input type="radio"/> Male<br><input type="radio"/> Female |
| Length                          | _____<br>(cm)                                              |
| Head Circumference              | _____<br>(cm)                                              |
| Birth Defect Present            | <input type="radio"/> Yes<br><input type="radio"/> No      |

---

Was birth defect diagnosed

- Prenatally  
 Perinatally  
 Unknown
- 

Type of Birth Defect

- Anencephalus  
 Cleft lip/palate  
 Club foot  
 congenital hip dislocation  
 Diaphragmatic hernia  
 Down Syndrome  
 Gastroschisis  
 Hydrocephalus  
 Hypospadias  
 Microcephalus  
 Omphalocele  
 Other Cardiac  
 Other chromosomal  
 Other CNS  
 Other GI  
 Other musculoskeletal  
 Other urogenital  
 Other(specify)  
 Patent ductus arteriosus  
 Polydactyly  
 Rectal atresia/stenosis  
 Renal agenesis  
 Spina bifida  
 Syndactyly  
 Unknown
- 

If Other, specify

\_\_\_\_\_
