# Supplementary material for: Boston Birth Cohort profile: rationale and study design
Source: PubMed Central journal article supplement (PMC9844822; doi:10.1097/pn9.0000000000000011), 2022-08-18
Supplement: NIHMS1818381-supplement-_13.pdf [file NIHMS1818381-supplement-_13.pdf]

Place Patient Sticker Here

Please fill this out and give to the medical assistant when you are called into the exam room. Your answers will help your care team take better care of your health and connect you with resources. Thank you!

**Please check “✓” your answers: I am a  Patient  Parent / Caregiver**

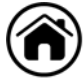

**What is your living situation today?**

- I have a steady place to live
- I have a place to live today, but I am worried about losing it in the future
- I do not have a steady place to live (I am temporarily staying with others, in a hotel, in a shelter, living outside on the street, on a beach, in a car, abandoned building, bus or train station, or in a park)
- Emergency: I do not have a safe place to stay tonight.

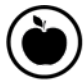

**Within the past 12 months, the food you bought just didn't last and you didn't have money to get more.**

- Often true
- Sometimes true
- Never true

**Within the past 12 months, you worried whether your food would run out before you got money to buy more.**

- Often true
- Sometimes true
- Never true

**Is this an emergency, do you need food for tonight?**

- Yes  No

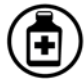

**Do you have trouble paying for medicines?**

- Yes  No

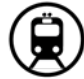

**Do you have trouble getting transportation to medical appointments?**

- Yes  No

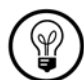

**Do you have trouble paying your heating or electricity bill?**

- Yes  No

**If yes, are you at risk of having your utilities shut off in the next week?**

- Yes  No

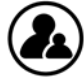

**Do you have trouble taking care of a child, family member or friend?**

- Yes  No

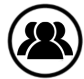

**Do you have trouble with day-to-day activities such as bathing, preparing meals, shopping, managing finances, etc.?**

- Yes  No

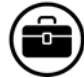

**Are you currently unemployed and looking for a job?**

- Yes  No

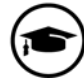

**Are you interested in more education?**

- Yes  No

**Please check “✓” the resources you want help with:**

Housing / Shelter

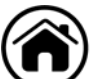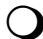

Food

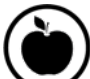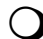

Paying for Medicine

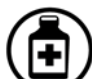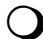

Transport

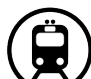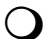

Utilities

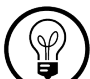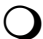

Childcare

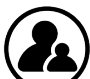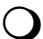

Care for elder or disabled

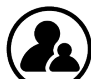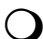

Daily Support

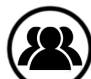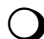

Job search / training

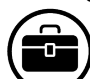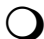

Education

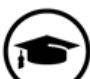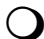

I do not want to answer these questions
