# Supplementary material for: Boston Birth Cohort profile: rationale and study design
Source: PubMed Central journal article supplement (PMC9844822; doi:10.1097/pn9.0000000000000011), 2022-08-18
Supplement: NIHMS1818381-supplement-_16.pdf [file NIHMS1818381-supplement-_16.pdf]

**CURRENT**

**Social  
Communication  
Questionnaire (SCQ)**

AutoScore™ Form

Michael Rutter, M.D., F.R.S., Anthony Bailey, M.D.,  
Sibel Kazak Berument, Ph.D., Catherine Lord, Ph.D.,  
and Andrew Pickles, Ph.D.

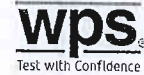

1. Is she/he now able to talk using short phrases or sentences?  
If *no*, skip to question 8. .... yes no
2. Do you have a to and fro "conversation" with her/him that involves  
taking turns or building on what you have said? ..... yes no
3. Does she/he ever use odd phrases or say the same thing over and  
over in almost exactly the same way (either phrases that she/he  
hears other people use or ones that she/he makes up)? ..... yes no
4. Does she/he ever use socially inappropriate questions or statements?  
For example, does she/he ever regularly ask personal questions or  
make personal comments at awkward times? ..... yes no
5. Does she/he ever get her/his pronouns mixed up  
(e.g., saying *you* or *she/he* for *I*)? ..... yes no
6. Does she/he ever use words that she/he seems to have invented  
or made up her/himself; put things in odd, indirect ways; or use  
metaphorical ways of saying things (e.g., saying *hot rain* for *steam*)? ..... yes no
7. Does she/he ever say the same thing over and over  
in exactly the same way or insist that you say the same thing  
over and over again? ..... yes no
8. Does she/he ever have things that she/he seems to have to do  
in a very particular way or order or rituals that she/he insists  
that you go through? ..... yes no
9. Does her/his facial expression usually seem appropriate to  
the particular situation, as far as you can tell? ..... yes no
10. Does she/he ever use your hand like a tool or as if it were part of  
her/his own body (e.g., pointing with your finger or putting your  
hand on a doorknob to get you to open the door)? ..... yes no
11. Does she/he ever have any interests that preoccupy her/him and  
might seem odd to other people (e.g., traffic lights, drainpipes,  
or timetables)? ..... yes no
12. Does she/he ever seem to be more interested in parts of a toy  
or an object (e.g., spinning the wheels of a car), rather than  
in using the object as it was intended? ..... yes no
13. Does she/he ever have any special interests that are *unusual*  
in their intensity but otherwise appropriate for her/his age and  
peer group (e.g., trains or dinosaurs)? ..... yes no
14. Does she/he ever seem to be *unusually* interested in the sight,  
feel, sound, taste, or smell of things or people? ..... yes no
15. Does she/he ever have any mannerisms or odd ways of moving  
her/his hands or fingers, such as flapping or moving her/his fingers  
in front of her/his eyes? ..... yes no
16. Does she/he ever have any complicated movements of  
her/his whole body, such as spinning or repeatedly bouncing  
up and down? ..... yes no
17. Does she/he ever injure her/himself deliberately,  
such as by biting her/his arm or banging her/his head? ..... yes no

Name of Subject \_\_\_\_\_

Date of Birth \_\_\_\_\_

Date of Interview \_\_\_\_\_

Chronological Age \_\_\_\_\_ F \_\_\_\_\_ M  
Gender

Name of Respondent \_\_\_\_\_

Relation to Subject \_\_\_\_\_

Clinician Name \_\_\_\_\_

School/Clinic \_\_\_\_\_

**Directions**

Thank you for taking the time to complete this questionnaire. Please answer each question by circling *yes* or *no*. A few questions ask about several related types of behavior; please circle *yes* if *any* of these behaviors were present during the past 3 months. Although you may be uncertain about whether some behaviors were present or not, please answer *yes* or *no* to every question on the basis of what you think.

18. Does she/he ever have any objects (*other* than a soft toy or comfort blanket) that she/he *has* to carry around? ..... yes no
19. Does she/he have any particular friends or a best friend? ..... yes no
20. Does she/he ever talk with you just to be friendly (rather than to get something)? ..... yes no
21. Does she/he ever *spontaneously* copy you (or other people) or what you are doing (such as vacuuming, gardening, or mending things)? ..... yes no
22. Does she/he ever spontaneously point at things around her/him just to show you things (not because she/he wants them)? ..... yes no
23. Does she/he ever use gestures, other than pointing or pulling your hand, to let you know what she/he wants? ..... yes no
24. Does she/he nod her/his head to indicate *yes*? ..... yes no
25. Does she/he shake her/his head to indicate *no*? ..... yes no
26. Does she/he usually look at you directly in the face when doing things with you or talking with you? ..... yes no
27. Does she/he smile back if someone smiles at her/him? ..... yes no
28. Does she/he ever show you things that interest her/him to engage your attention? ..... yes no
29. Does she/he ever offer to share things other than food with you? ..... yes no
30. Does she/he ever seem to want you to join in her/his enjoyment of something? ..... yes no
31. Does she/he ever try to comfort you if you are sad or hurt? ..... yes no
32. If she/he wants something or wants help, does she/he look at you and use gestures with sounds or words to get your attention? ..... yes no
33. Does she/he show a normal range of facial expressions? ..... yes no
34. Does she/he ever spontaneously join in and try to copy the actions in social games, such as *The Mulberry Bush* or *London Bridge Is Falling Down*? ..... yes no
35. Does she/he play any pretend or make-believe games? ..... yes no
36. Does she/he seem interested in other children of approximately the same age whom she/he does not know? ..... yes no
37. Does she/he respond positively when another child approaches her/him? ..... yes no
38. If you come into a room and start talking to her/him without calling her/his name, does she/he usually look up and pay attention to you? ..... yes no
39. Does she/he ever play imaginative games with another child in such a way that you can tell that each child understands what the other is pretending? ..... yes no
40. Does she/he play cooperatively in games that need some form of joining in with a group of other children, such as hide-and-seek or ball games? ..... yes no

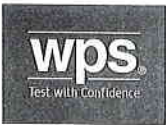

# SRS-2 AutoScore™ Form

Preschool

MALE

FEMALE

## INSTRUCTIONS

For each question, please darken the circle that best describes this child's behavior **over the past 6 months.**

Child's name \_\_\_\_\_ Child's age \_\_\_\_\_ years \_\_\_\_\_ months

Rater's name \_\_\_\_\_ Date of rating \_\_\_\_\_

Relationship to rated individual  Mother  Father  Other custodial adult  Teacher  Other specialist

School or clinic \_\_\_\_\_

**PLEASE PRESS HARD WHEN MARKING YOUR RESPONSES.**

**1 = NOT TRUE    2 = SOMETIMES TRUE    3 = OFTEN TRUE    4 = ALMOST ALWAYS TRUE**

1. Seems much more fidgety in social situations than when alone. .... (1) (2) (3) (4)
2. Expressions on his or her face don't match what he or she is saying. .... (1) (2) (3) (4)
3. Seems self-confident when interacting with others. .... (1) (2) (3) (4)
4. When under stress, child seems to go on "autopilot" (for example, shows rigid or inflexible patterns of behavior that seem odd). .... (1) (2) (3) (4)
5. Doesn't recognize when others are trying to take advantage of him or her. .... (1) (2) (3) (4)
6. Would rather be alone than with others. .... (1) (2) (3) (4)
7. Is aware of what others are thinking or feeling. .... (1) (2) (3) (4)
8. Behaves in ways that seem strange or bizarre. .... (1) (2) (3) (4)
9. Clings to adults, seems too dependent on them. .... (1) (2) (3) (4)
10. Unable to pick up on any of the meaning of conversations of older children or adults. .... (1) (2) (3) (4)
11. Has good self-confidence. .... (1) (2) (3) (4)
12. Is able to communicate his or her feelings to others in words or gestures. .... (1) (2) (3) (4)
13. Is slow or awkward in turn-taking interactions with peers. .... (1) (2) (3) (4)
14. Is not well coordinated in physical activities. .... (1) (2) (3) (4)
15. Is able to understand the meaning of other people's tone of voice and facial expressions. .... (1) (2) (3) (4)
16. Avoids eye contact or has unusual eye contact. .... (1) (2) (3) (4)
17. Recognizes when something is unfair. .... (1) (2) (3) (4)
18. When on the playground or in a group with other young children, child does not attempt to interact with other children. .... (1) (2) (3) (4)
19. Gets frustrated trying to get ideas across in conversations. .... (1) (2) (3) (4)
20. Has a strange way of playing with a toy. .... (1) (2) (3) (4)
21. Is able to imitate others' actions. .... (1) (2) (3) (4)
22. Plays appropriately with children his or her age. .... (1) (2) (3) (4)
23. Does not join group activities unless told to do so. .... (1) (2) (3) (4)
24. Has more difficulty than other children with changes in his or her routine. .... (1) (2) (3) (4)
25. Doesn't seem to mind being out of step with or "not on the same wavelength" as others. .... (1) (2) (3) (4)
26. Offers comfort to others when they are sad. .... (1) (2) (3) (4)
27. Avoids starting social interactions with peers or adults. .... (1) (2) (3) (4)
28. Thinks or talks about the same thing over and over. .... (1) (2) (3) (4)
29. Is regarded by other children as odd or weird. .... (1) (2) (3) (4)
30. Becomes upset in a situation with lots of things going on. .... (1) (2) (3) (4)
31. Can't get his or her mind off something once he or she starts thinking about it. .... (1) (2) (3) (4)
32. Wants to be changed when diaper or underwear is soiled or wet. .... (1) (2) (3) (4)

Continue on back page

**PLEASE PRESS HARD WHEN MARKING YOUR RESPONSES.**

**1 = NOT TRUE    2 = SOMETIMES TRUE    3 = OFTEN TRUE    4 = ALMOST ALWAYS TRUE**

33. Is socially awkward, even when he or she is trying to be polite. .... (1) (2) (3) (4)
34. Avoids people who want to be emotionally close to him or her. .... (1) (2) (3) (4)
35. Has trouble keeping up with the flow of normal interaction with other children. .... (1) (2) (3) (4)
36. Has difficulty relating to adults. .... (1) (2) (3) (4)
37. Has difficulty relating to peers. .... (1) (2) (3) (4)
38. Responds appropriately to mood changes in others (for example, when a friend's or playmate's mood changes from happy to sad). .... (1) (2) (3) (4)
39. Has a restricted (or unusually narrow) range of interests. .... (1) (2) (3) (4)
40. Is imaginative, good at pretending (without losing touch with reality). .... (1) (2) (3) (4)
41. Wanders aimlessly from one activity to another. .... (1) (2) (3) (4)
42. Seems overly sensitive to sounds, textures, or smells. .... (1) (2) (3) (4)
43. Separates easily from caregivers. .... (1) (2) (3) (4)
44. Doesn't understand how events are related to one another the way other children his or her age do. .... (1) (2) (3) (4)
45. Focuses his or her attention to where others are looking or listening. .... (1) (2) (3) (4)
46. Has overly serious facial expressions. .... (1) (2) (3) (4)
47. Is too silly or laughs inappropriately. .... (1) (2) (3) (4)
48. Has a sense of humor, understands jokes. .... (1) (2) (3) (4)
49. Does extremely well at a few tasks, but does not do as well at most other tasks. .... (1) (2) (3) (4)
50. Has repetitive, odd behaviors such as hand flapping or rocking. .... (1) (2) (3) (4)
51. Responds to clear, direct questions in ways that don't seem to make any sense. .... (1) (2) (3) (4)
52. Knows when he or she is talking too loud or making too much noise. .... (1) (2) (3) (4)
53. Talks to people with an unusual tone of voice (for example, talks like a robot or like he or she is giving a lecture). .... (1) (2) (3) (4)
54. Seems to react to people as if they are objects. .... (1) (2) (3) (4)
55. Knows when he or she is too close to someone or is invading someone's space. .... (1) (2) (3) (4)
56. Walks in between two people who are talking. .... (1) (2) (3) (4)
57. Other children do not like to play with him or her. .... (1) (2) (3) (4)
58. Concentrates too much on parts of things rather than seeing the whole picture. For example, spins the wheels of a toy car but doesn't play with it as a car, or plays with doll's hair but not with the whole doll. .... (1) (2) (3) (4)
59. Is overly suspicious. .... (1) (2) (3) (4)
60. Is emotionally distant, doesn't show his or her feelings. .... (1) (2) (3) (4)
61. Is inflexible, has a hard time changing his or her mind. .... (1) (2) (3) (4)
62. Gives unusual or illogical reasons for doing things. .... (1) (2) (3) (4)
63. Touches others in an unusual way (for example, he or she may touch someone just to make contact and then walk away without saying anything). .... (1) (2) (3) (4)
64. Is too tense in social settings. .... (1) (2) (3) (4)
65. Stares or gazes off into space. .... (1) (2) (3) (4)

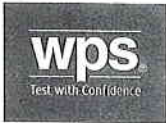

# SRS-2 AutoScore™ Form

School-Age

MALE

FEMALE

## INSTRUCTIONS

For each question, please darken the circle that best describes this child's behavior **over the past 6 months.**

Child's name \_\_\_\_\_ Child's age in years \_\_\_\_\_

Rater's name \_\_\_\_\_ Date of rating \_\_\_\_\_

Relationship to rated individual  Mother  Father  Other custodial adult  Teacher  Other specialist

Grade \_\_\_\_\_ School or clinic \_\_\_\_\_

**PLEASE PRESS HARD WHEN MARKING YOUR RESPONSES.**

**1 = NOT TRUE    2 = SOMETIMES TRUE    3 = OFTEN TRUE    4 = ALMOST ALWAYS TRUE**

1. Seems much more fidgety in social situations than when alone. .... (1) (2) (3) (4)
2. Expressions on his or her face don't match what he or she is saying. .... (1) (2) (3) (4)
3. Seems self-confident when interacting with others. .... (1) (2) (3) (4)
4. When under stress, he or she shows rigid or inflexible patterns of behavior that seem odd. .... (1) (2) (3) (4)
5. Doesn't recognize when others are trying to take advantage of him or her. .... (1) (2) (3) (4)
6. Would rather be alone than with others. .... (1) (2) (3) (4)
7. Is aware of what others are thinking or feeling. .... (1) (2) (3) (4)
8. Behaves in ways that seem strange or bizarre. .... (1) (2) (3) (4)
9. Clings to adults, seems too dependent on them. .... (1) (2) (3) (4)
10. Takes things too literally and doesn't get the real meaning of a conversation. .... (1) (2) (3) (4)
11. Has good self-confidence. .... (1) (2) (3) (4)
12. Is able to communicate his or her feelings to others. .... (1) (2) (3) (4)
13. Is awkward in turn-taking interactions with peers (for example, doesn't seem to understand the give-and-take of conversations). .... (1) (2) (3) (4)
14. Is not well coordinated. .... (1) (2) (3) (4)
15. Is able to understand the meaning of other people's tone of voice and facial expressions. .... (1) (2) (3) (4)
16. Avoids eye contact or has unusual eye contact. .... (1) (2) (3) (4)
17. Recognizes when something is unfair. .... (1) (2) (3) (4)
18. Has difficulty making friends, even when trying his or her best. .... (1) (2) (3) (4)
19. Gets frustrated trying to get ideas across in conversations. .... (1) (2) (3) (4)
20. Shows unusual sensory interests (for example, mouthing or spinning objects) or strange ways of playing with toys. .... (1) (2) (3) (4)
21. Is able to imitate others' actions. .... (1) (2) (3) (4)
22. Plays appropriately with children his or her age. .... (1) (2) (3) (4)
23. Does not join group activities unless told to do so. .... (1) (2) (3) (4)
24. Has more difficulty than other children with changes in his or her routine. .... (1) (2) (3) (4)
25. Doesn't seem to mind being out of step with or "not on the same wavelength" as others. .... (1) (2) (3) (4)
26. Offers comfort to others when they are sad. .... (1) (2) (3) (4)
27. Avoids starting social interactions with peers or adults. .... (1) (2) (3) (4)
28. Thinks or talks about the same thing over and over. .... (1) (2) (3) (4)
29. Is regarded by other children as odd or weird. .... (1) (2) (3) (4)
30. Becomes upset in a situation with lots of things going on. .... (1) (2) (3) (4)
31. Can't get his or her mind off something once he or she starts thinking about it. .... (1) (2) (3) (4)
32. Has good personal hygiene. .... (1) (2) (3) (4)

Continue on back page

**PLEASE PRESS HARD WHEN MARKING YOUR RESPONSES.**

**1 = NOT TRUE    2 = SOMETIMES TRUE    3 = OFTEN TRUE    4 = ALMOST ALWAYS TRUE**

33. Is socially awkward, even when he or she is trying to be polite. .... (1) (2) (3) (4)
34. Avoids people who want to be emotionally close to him or her. .... (1) (2) (3) (4)
35. Has trouble keeping up with the flow of a normal conversation. .... (1) (2) (3) (4)
36. Has difficulty relating to adults. .... (1) (2) (3) (4)
37. Has difficulty relating to peers. .... (1) (2) (3) (4)
38. Responds appropriately to mood changes in others (for example, when a friend's or playmate's mood changes from happy to sad). .... (1) (2) (3) (4)
39. Has an unusually narrow range of interests. .... (1) (2) (3) (4)
40. Is imaginative, good at pretending (without losing touch with reality). .... (1) (2) (3) (4)
41. Wanders aimlessly from one activity to another. .... (1) (2) (3) (4)
42. Seems overly sensitive to sounds, textures, or smells. .... (1) (2) (3) (4)
43. Separates easily from caregivers. .... (1) (2) (3) (4)
44. Doesn't understand how events relate to one another (cause and effect) the way other children his or her age do. .... (1) (2) (3) (4)
45. Focuses his or her attention to where others are looking or listening. .... (1) (2) (3) (4)
46. Has overly serious facial expressions. .... (1) (2) (3) (4)
47. Is too silly or laughs inappropriately. .... (1) (2) (3) (4)
48. Has a sense of humor, understands jokes. .... (1) (2) (3) (4)
49. Does extremely well at a few tasks, but does not do as well at most other tasks. .... (1) (2) (3) (4)
50. Has repetitive, odd behaviors such as hand flapping or rocking. .... (1) (2) (3) (4)
51. Has difficulty answering questions directly and ends up talking around the subject. .... (1) (2) (3) (4)
52. Knows when he or she is talking too loud or making too much noise. .... (1) (2) (3) (4)
53. Talks to people with an unusual tone of voice (for example, talks like a robot or like he or she is giving a lecture). .... (1) (2) (3) (4)
54. Seems to react to people as if they are objects. .... (1) (2) (3) (4)
55. Knows when he or she is too close to someone or is invading someone's space. .... (1) (2) (3) (4)
56. Walks in between two people who are talking. .... (1) (2) (3) (4)
57. Gets teased a lot. .... (1) (2) (3) (4)
58. Concentrates too much on parts of things rather than seeing the whole picture. For example, if asked to describe what happened in a story, he or she may talk only about the kind of clothes the characters were wearing. .... (1) (2) (3) (4)
59. Is overly suspicious. .... (1) (2) (3) (4)
60. Is emotionally distant, doesn't show his or her feelings. .... (1) (2) (3) (4)
61. Is inflexible, has a hard time changing his or her mind. .... (1) (2) (3) (4)
62. Gives unusual or illogical reasons for doing things. .... (1) (2) (3) (4)
63. Touches others in an unusual way (for example, he or she may touch someone just to make contact and then walk away without saying anything). .... (1) (2) (3) (4)
64. Is too tense in social settings. .... (1) (2) (3) (4)
65. Stares or gazes off into space. .... (1) (2) (3) (4)
