# Supplementary material for: Boston Birth Cohort profile: rationale and study design
Source: PubMed Central journal article supplement (PMC9844822; doi:10.1097/pn9.0000000000000011), 2022-08-18
Supplement: NIHMS1818381-supplement-_18.pdf [file NIHMS1818381-supplement-_18.pdf]

DIRECTIONS

For each question, circle the number that best describes the child's behavior over the past 6 months.

ID: [Handwritten] Chronological Age: \_\_\_\_\_
Gender (required): [ ] Female [ ] Male [ ] Primary: \_\_\_\_\_
Relationship to Child: [X] Mother [ ] Father [ ] Other \_\_\_\_\_
Administration Date: \_\_\_\_\_

PLEASE PRESS HARD WHEN MARKING YOUR RESPONSES.

1 = NOT TRUE 2 = SOMETIMES TRUE 3 = OFTEN TRUE 4 = ALMOST ALWAYS TRUE

- 1. Seems much more fidgety in social situations than when alone.
2. Expressions on his or her face don't match what he or she is saying.
3. Seems self-confident when interacting with others.
4. When under stress, he or she shows rigid or inflexible patterns of behavior that seem odd.
5. Doesn't recognize when others are trying to take advantage of him or her.
6. Would rather be alone than with others.
7. Is aware of what others are thinking or feeling.
8. Behaves in ways that seem strange or bizarre.
9. Clings to adults, seems too dependent on them.
10. Takes things too literally and doesn't get the real meaning of a conversation.
11. Has good self-confidence.
12. Is able to communicate his or her feelings to others.
13. Is awkward in turn-taking interactions with peers (e.g., doesn't seem to understand the give-and-take of conversations).
14. Is not well coordinated.
15. Is able to understand the meaning of other people's tone of voice and facial expressions.
16. Avoids eye contact or has unusual eye contact.
17. Recognizes when something is unfair.
18. Has difficulty making friends, even when trying his or her best.
19. Gets frustrated trying to get ideas across in conversations.
20. Shows unusual sensory interests (e.g., mouthing or spinning objects) or strange ways of playing with toys.
21. Is able to imitate others' actions.
22. Plays appropriately with children his or her age.
23. Does not join group activities unless told to do so.
24. Has more difficulty than other children with changes in his or her routine.
25. Doesn't seem to mind being out of step with or "not on the same wavelength" as others.
26. Offers comfort to others when they are sad.
27. Avoids starting social interactions with peers or adults.
28. Thinks or talks about the same thing over and over.
29. Is regarded by other children as odd or weird.
30. Becomes upset in a situation with lots of things going on.
31. Can't get his or her mind off something once he or she starts thinking about it.
32. Has good personal hygiene.

Continue on back page...

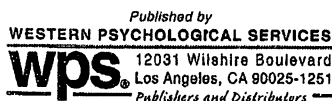

PLEASE PRESS HARD WHEN MARKING YOUR RESPONSES.

1 = NOT TRUE      2 = SOMETIMES TRUE      3 = OFTEN TRUE      4 = ALMOST ALWAYS TRUE

33. Is socially awkward, even when he or she is trying to be polite. .... 1 2 3 4
34. Avoids people who want to be emotionally close to him or her. .... 1 2 3 4
35. Has trouble keeping up with the flow of a normal conversation. .... 1 2 3 4
36. Has difficulty relating to adults. .... 1 2 3 4
37. Has difficulty relating to peers. .... 1 2 3 4
38. Responds appropriately to mood changes in others (e.g., when a friend's or playmate's mood changes from happy to sad). .... 1 2 3 4
39. Has an unusually narrow range of interests. .... 1 2 3 4
40. Is imaginative, good at pretending (without losing touch with reality). .... 1 2 3 4
41. Wanders aimlessly from one activity to another. .... 1 2 3 4
42. Seems overly sensitive to sounds, textures, or smells. .... 1 2 3 4
43. Separates easily from caregivers. .... 1 2 3 4
44. Doesn't understand how events relate to one another (cause and effect) the way other children his or her age do. .... 1 2 3 4
45. Focuses his or her attention to where others are looking or listening. .... 1 2 3 4
46. Has overly serious facial expressions. .... 1 2 3 4
47. Is too silly or laughs inappropriately. .... 1 2 3 4
48. Has a sense of humor, understands jokes. .... 1 2 3 4
49. Does extremely well at a few tasks, but does not do as well at most other tasks. .... 1 2 3 4
50. Has repetitive, odd behaviors such as hand flapping or rocking. .... 1 2 3 4
51. Has difficulty answering questions directly and ends up talking around the subject. .... 1 2 3 4
52. Knows when he or she is talking too loud or making too much noise. .... 1 2 3 4
53. Talks to people with an unusual tone of voice (e.g., talks like a robot or like he or she is giving a lecture). .... 1 2 3 4
54. Seems to react to people as if they are objects. .... 1 2 3 4
55. Knows when he or she is too close to someone or is invading someone's space. .... 1 2 3 4
56. Walks in between two people who are talking. .... 1 2 3 4
57. Gets teased a lot. .... 1 2 3 4
58. Concentrates too much on parts of things rather than seeing the whole picture.  
For example, if asked to describe what happened in a story, he or she may talk only about the kind of clothes the characters were wearing. .... 1 2 3 4
59. Is overly suspicious. .... 1 2 3 4
60. Is emotionally distant, doesn't show his or her feelings. .... 1 2 3 4
61. Is inflexible, has a hard time changing his or her mind. .... 1 2 3 4
62. Gives unusual or illogical reasons for doing things. .... 1 2 3 4
63. Touches others in an unusual way (e.g., he or she may touch someone just to make contact and then walk away without saying anything). .... 1 2 3 4
64. Is too tense in social settings. .... 1 2 3 4
65. Stares or gazes off into space. .... 1 2 3 4
